# Supplementary material
Source: publisher figshare collection journal article supplement (https://brill.figshare.com/articles/dataset/_/11994000)
Supplement: Supplementary file 1 [file 1]

**Identification of past and present gobies: distinguishing *Gobius*  
and *Pomatoschistus* (Teleostei: Gobioidi) species using characters  
of otoliths, meristics and body morphometry**

*Carolin Gut*

Department of Earth and Environmental Sciences, Ludwig-Maximilians-Universität  
München, Richard-Wagner Straße 10, 80333 Munich, Germany

*Jasna Vukić*

Department of Ecology, Faculty of Science, Charles University, Viničná 7, CZ-128 44  
Praha, Czech Republic

*Radek Šanda*

Department of Zoology, National Museum, Václavské nám. 68, CZ-115 79 Praha,  
Czech Republic

*Timo Moritz*

Deutsches Meeresmuseum, Katharinenberg 14-20, 18439 Stralsund, Germany  
Institute for Zoology and Evolutionary Research, Friedrich-Schiller-University Jena,  
Erbertstr. 1, 07743 Jena, Germany

*Bettina Reichenbacher*

Department of Earth and Environmental Sciences, Ludwig-Maximilians-Universität  
München, Richard-Wagner Straße 10, 80333 Munich, Germany

GeoBio-Center, Ludwig-Maximilians-Universität München, 80333 Munich, Germany

*b.reichenbacher@lrz.uni-muenchen.de*

**Supplementary material**
