# Supplementary material
Source: publisher figshare collection journal article supplement (https://brill.figshare.com/articles/dataset/_/11994000)
Supplement: Supplementary file 1 [file 1]

## Sheet: Suppl. Data 3a
	Supplementary Table S3a. Fourier descriptors when the complete dataset of Gobius was included in the Fourier shape analysis.
	Specimen number	Species	A1	A2	A3	A4	A5	A6	A7	A8	A9	A10	A11	A12	A13	A14	A15	A16	A17	A18	A19	A20	A21	A22	A23	A24	B1	B2	B3	B4	B5	B6	B7	B8	B9	B10	B11	B12	B13	B14	B15	B16	B17	B18	B19	B20	B21	B22	B23
	Gau-1-re.auratus	auratus	1	0,0242159108770535	0,0559975094292594	-0,0133327903654268	0,0415686887866853	-0,00713271029955422	0,0164185335532963	0,0071366152055402	-0,00242182885077042	0,00402243446261399	5.88121e+09	-0,000931687951565287	0,00357265620474276	-0,000276783537079318	0,00138539386204542	0,00108854752972954	8.45305e+09	0,00102085808399615	0,00136974824332817	0,00103999900446321	0,00150416007253742	0,000349194842240269	0,00125434572360207	-0,000472646314906785	0	0,00296839393846912	-0,0315222704415941	-0,00872569930970701	-0,0206187781581044	-0,0105204022884229	-0,000851824623394211	-0,00392661052202916	-1.44949e+09	-0,000932695465344736	-0,00104618956746331	-6.74366e+09	-0,00162983557110344	0,00197227369524038	0,000191502573015292	-0,00127627487012793	0,00137533905927407	-0,00249199891631176	-0,000627073539073381	0,000119118188889462	-0,000646755157875775	0,000474708940483028	0,0014648536342708
	Gau-2-re.auratus	auratus	1	0,0152842230136477	0,0529605436218415	-0,00927160507383666	0,0363468303386487	-0,00513575812124975	0,0169630787334508	0,0083562174302231	0,000787475297329159	0,00578358522869453	-0,000237826660547518	0,00044103986944898	0,000620017218929229	-0,00170739962658473	-0,000467255862808073	-0,00220358972334167	8.79036e+09	0,000245558389185898	0,000311136068428425	0,00155197867774423	0,000221867501946435	0,000933034276836699	6.92302e+09	0,000170284149302534	0	0,012028688713947	-0,0298014059437034	0,000900191648774533	-0,0211544435302451	-0,00690960586825397	-0,00096992289292039	-0,00314218569786697	0,00109605585453837	0,00204627569951118	-0,00129730052001601	0,0026819675406148	-0,0019824867230478	-0,00124250545955637	-0,000665847556865828	-0,00385455472542578	0,000600775411833896	-0,00200612723591614	-0,000182667749525753	0,000385215427726092	-7.65168e+09	0,00050571229973341	0,000226496831064646
	Gau-3-R,selce_OK.auratus	auratus	1	0,0452932470358266	0,0671128533208177	-0,0199642346625568	0,0531481338375062	-0,00788721689114273	0,0201044086876795	0,0033702998492308	0,000382135238398821	0,00282240642887132	0,00110489848787461	-0,00165202226952976	0,000110180306750868	1.14939e+09	0,00213944232176347	-0,00146847002315003	0,00094984798633387	-0,000278889320135896	0,0003783197219816	0,00144054791894109	-0,000628389285371585	0,000146323029532124	-0,000858915376332998	-0,000476107076135559	0	-0,00131414075906359	-0,0593772242299934	0,0133079945782077	-0,023514978267708	-0,0129962328147173	0,00646204477677846	-0,00456156101532064	-5.62823e+08	-0,00175373215375657	0,000669001940236198	0,000245881485722829	-0,00328476981148344	-0,000708638049187477	-0,00155458655695528	0,000316847617968229	0,000863788766468712	-0,0015766894550468	0,00129088841639306	0,000107032866133535	0,000301862090551208	0,00121682167079909	-0,000701356073072439
	Gau-4-R,selce_OK.auratus	auratus	1	0,0107402309733785	0,0579174769103719	0,00361586500945367	0,0418767982331055	-0,0071427978750709	0,0124461084053815	0,000632448076464098	0,00220964050341759	0,00566240806905825	0,00170036190398158	0,00394272422130304	0,00331427022895378	-0,000401775998326126	0,00171860613422119	0,000335895118936885	0,00173756326850726	0,00127719499987475	0,000217631818992714	0,000549147183261531	-0,00115775031372907	0,000274795117146107	-0,000294729426973078	7.20734e+09	0	0,0032272193632159	-0,0400793388352828	0,00666568132807282	-0,00787642892473792	-0,000576843689310251	0,0102896472271387	-0,0031064929811785	-0,000177029266820653	-0,000702114674793303	-0,000407136987427347	0,001736387055846	0,001172575777967	0,000211881820268006	-0,000453120223435993	-0,00234689286477004	0,000322927410223176	-0,00237549346646777	0,000636411309960881	-6.59142e+09	-0,000250874656699309	0,000131946806782412	-0,000517274633933309
	Gau-5-R,selce_OK.auratus	auratus	1	0,0122542700484149	0,0568855687527405	-0,00297948221506091	0,0502429215015692	-0,00598212432676733	0,019906211276827	-0,000226246776929385	0,000409766591211673	0,00208504178589336	-0,00171948245975212	1.99036e+09	0,00120147490313201	-0,000445221215410776	0,00126036083067789	-0,000446918699049954	0,000418401255899578	-0,00152419181350565	-0,000367803005111515	0,000216842130064912	-0,00102807135350603	0,000551827430241937	-0,000245019140096237	-4.59104e+09	0	0,0299388719345282	-0,0509826693380257	0,0105384578340632	-0,0258751304201925	-0,00193358115059332	0,00191695135222352	-0,00261868931851118	0,00416467393236952	-3.90344e+09	-0,0026194377129021	0,00245211357083263	-0,00445355894634487	0,00110036155907196	-0,000848486342401949	0,0008099578606785	0,00121506006071645	0,00058021128778006	0,000469204064535834	0,000335740705695357	-0,000100573144291889	0,000751243049009358	-0,000171347671558849
	Gau-6-R,selce_OK.auratus	auratus	1	0,00408970625583985	0,0584276850448234	-0,00449873656360582	0,0377254997598985	-0,00382716524916773	0,0161543431910008	0,000753693481055773	-0,00280317726259746	-0,000466388094864584	-0,000304330806175096	0,00240911777075482	0,000536642696795275	0,00127414239722794	0,00223484488937667	-0,00179335372320727	0,0015386399211266	-0,00166457877940175	-6.58305e+09	-0,000687314251391809	-0,00104042811797957	0,00115266778510678	-0,000180891930527502	0,000234185677196075	0	-0,010740901754781	-0,0450207432127264	-0,00588403827094178	-0,0267562909697536	-0,00783087141486237	-0,00305685479592752	-0,00543497161725937	0,00178497164652375	-0,00605690636140219	-0,0015503752756336	-0,0017362615809269	-0,0041453382448795	-0,000642940647090227	-0,00181877499548701	0,000383615489049806	1.24003e+09	0,000185420062929784	0,000515282480582125	-0,00122468192779623	-0,000109742704868206	-0,000708808444560138	-0,000269363906211696
	Gau-7-R,selce_OK.auratus	auratus	1	0,0170474039817368	0,0547371511550449	-0,00613739734252799	0,0369850165301135	-0,000392442714066155	0,0253498497428226	0,00283538912560572	0,00573798272174121	-0,00128092250239594	-0,00163868890351825	0,00121135947232125	-0,00151218215608508	0,00156829523064662	0,00126214449566862	-0,00096336812963091	0,00123854844104779	-0,00196003492291582	-9.90564e+07	-0,00158434769973563	0,000979705007750235	0,00119501674358272	-0,000470153125105985	-0,000106960789576345	0	0,0164370430447103	-0,0567244291213982	0,00774375185912733	-0,0342783111936816	0,001045437882344	-0,00594032867863166	-0,00085155690938692	0,00260463402523941	-0,00426489820339745	-0,0019039262893906	-0,00480174023892795	-0,00439253729972908	-7.99363e+09	-0,00238153801313717	0,00239400964142875	-0,000488171554432479	0,00126820397738937	0,000719526631415199	-0,00162831694097669	0,000654913654255174	-0,000937996564392689	0,000364606191659212
	Gau-8-R,selce_OK.auratus	auratus	1	0,0166175946868712	0,0505739295776027	-0,00320012426107185	0,0436993262208648	-0,00461533136878925	0,024617592174971	0,00283637961375235	0,00386521687211687	0,00241126364718646	-0,000749789709543831	0,0026000100974485	0,00189772541977198	0,000805737007690861	0,00263372570024625	-0,000513270060442804	0,00172200689752684	-0,00154446286682508	-0,000110201610824434	-0,000608011082906262	-0,000212993857328155	0,000516836506106897	-0,000302200307350733	6.27524e+09	0	0,0200766823035609	-0,050336168670356	0,00507341101322063	-0,0277425879448221	-0,000412498873311403	-0,00147645742625984	-0,000758810569461126	-0,000322320836589872	-0,00414354973900397	-0,00124231485570265	-0,00167001131857487	-0,00449451440259818	0,00174843596266155	-0,0026446480914031	0,00187255396228036	0,000730416205269828	-0,000648707976648928	0,00096246607448824	-0,000966395124526406	-0,000246371770759231	0,000354086899334786	-0,00089715383601331
	Gau-9-R,selce_OK.auratus	auratus	1	0,0104821867531907	0,0621366628953785	0,00561496298412031	0,0478133277245717	-8.52095e+07	0,0149253982391044	0,00328499630543543	0,00279098135581707	0,00394490261596124	0,00206233349999526	0,00208667947295312	0,000763113493993906	5.73421e+09	7.7486e+08	2.26351e+09	0,000424099532842062	0,00126559549921322	0,000635492602452414	0,00118745730240932	0,000227733589936276	-0,00038966368983596	-0,000601157296234428	-0,000219028158694036	0	0,0105788234371911	-0,0129758420036419	-0,00624234156650359	0,00907408367437476	-0,0100672073321948	0,0135232469367758	-0,000738554717682574	-0,000831914860603523	-0,000918597774500567	-0,0020925713525183	-0,00183713851755376	0,000967009186079363	-0,000614632315890215	0,000758071029735719	-2.78013e+09	0,000190356120521998	3.27062e+09	0,000474284696539819	9.98546e+09	-0,000207511548314663	1.21366e+09	7.79499e+09
	Gau 2 L,selce_OK.auratus	auratus	1	0,0299046786379094	0,0387337359147479	-0,00101324171323232	0,0340359670454869	-0,00347740178077024	0,0183858333419294	0,000938108835484271	0,000902085046563	0,000900990230941476	-0,00179926643177187	0,0017764408801659	-0,000413475179253858	0,000936772546725937	-0,000250572839605978	0,000613646062872881	0,000599477638511912	-1.00874e+09	0,00153215962608208	-0,000626137359402574	-1.86368e+09	-2.45193e+09	-0,000241738430391573	0,000681704778213927	0	0,029297667906626	-0,0539543760645486	0,0175992863043847	-0,0409371238468855	0,00481435476902764	-0,0115143436940956	-0,00282753837485136	0,00226785432740621	-0,00322905878539739	0,00117991730992243	0,000225960306577877	-0,00196961027410911	0,00172643215793208	-0,000607808479921923	0,00172061066395344	7.57943e+09	0,00142123925079288	0,00112197142947967	0,000579103777276734	0,00206602705447906	0,000733095396105235	0,00181002983089584
	Gau 3 L,selce_OK.auratus	auratus	1	0,00876464027089794	0,0516749295388556	-9.35607e+09	0,0430029149381273	-0,00213535817500449	0,0179542193543509	-0,000718354908867087	-0,00112953950133741	0,00083089282932309	-0,00174919229726335	0,00169576742518297	0,000995695617553512	-0,000936745376653869	0,00240595138012363	-0,00143154462615261	0,00122199259288108	-0,000205644246681566	0,000241599757982591	0,000787091820272768	0,00010004077115615	0,000819805203573523	0,000113437515663949	0,000307275618292988	0	0,0225267925487547	-0,0617453930019563	0,0127363424842417	-0,0323254404977817	0,00054414390231775	-0,00118732727488489	-0,00206323851530096	0,000962976654588348	-0,00377805075743132	-0,00342869700881854	-0,00269800744538249	-0,00588266762435022	0,000596316986214368	-0,00289429956974429	0,000827081372238619	0,000117801752582022	-0,00046085951152314	0,00100100348330227	-0,000241924733262057	0,000573262419153438	0,000831717666229169	-0,000186324305054495
	Gau 4 L,selce_OK.auratus	auratus	1	0,0197083916236111	0,0581111698947272	0,00918170851094026	0,0415393857605275	-0,00648246509392341	0,0136183917245595	-0,00126123848233495	0,000760935755537349	0,00447658043495722	0,000606358306220857	0,00311083704675228	0,00104836943219851	-0,00150648068567071	0,000788169921152596	-0,00108815775368124	0,000971474176265857	0,000462384056305014	6.58001e+08	0,000160765504290179	-0,000959271310932143	-7.13379e+09	-0,00017376212813257	0,000220645720383206	0	0,0248611858009942	-0,0302523061293522	0,0161589301879662	-0,00223849122768146	0,00765045145127148	0,0101896979967104	0,00173569359263811	0,00385164237201711	0,000913195910586956	0,000823258695799694	0,00244337819320286	0,000567390599578829	0,00192843957183047	0,00216704971888238	0,000387177777876576	0,000801796257034341	-0,000480644033808782	0,000898164749280945	-0,000172819256037911	0,00081117635517114	0,000543865773159601	0,000176636914479957
	Gau 5 L,selce_OK.auratus	auratus	1	-0,000625600979224636	0,0555216577530308	-0,00740855220688398	0,0467555004053205	-0,00103059886709449	0,0226766515421799	0,00306877371192343	0,000508507301434255	0,000721571778605472	-0,00183995771054055	0,000193702571436817	0,00180650828986372	-0,000451895267949351	0,00179653212592333	0,000407388502428848	0,00209933633107491	-0,000313088720613839	0,00026476921549509	-0,000346182482669171	-0,00115709840643754	-0,000716139280934922	-0,000778639314394801	-0,00055174896153425	0	0,0105173293560047	-0,0501521649157212	-0,00383149637324953	-0,0274289674823089	-0,00481363114244651	-5.62231e+09	-0,00347480466001183	0,00544482750549519	-0,00206132940094151	-0,000737582086793733	0,00148249725391189	-0,00468535390429942	0,00055860108633165	-0,00194932803842093	-0,000916864976277852	0,000647990211821502	-0,000944823055911069	0,000871250195714531	0,000347859346175841	-0,000132118455455666	0,000810187110177104	-0,000266198138237208
	Gau 6 L,selce_OK.auratus	auratus	1	0,0259934786842109	0,0422697932594346	0,00419960590905084	0,033273213778903	0,000253476524634841	0,0128728472696219	-0,000291428765341537	-0,000676548310785973	-5.56266e+09	-0,000823555038118185	0,00225197549110013	-0,000917377665427313	0,00247981287021462	-0,00135649460890165	-0,00108638374395908	0,000357618884895174	-0,00298435910966221	-0,000409657742597955	-0,000944416527439658	-0,000408868909589353	0,000697053375957549	-0,000245372526772409	0,000891862454095857	0	0,0138324028262021	-0,0533256838986281	0,00434797854311955	-0,0292012276223427	0,00327169659857503	-0,00429493231484375	-0,00219114249975392	0,000628161944391017	-0,00569792854645806	-0,00279619697816558	-0,00176850576570893	-0,00298810924474643	0,000538928547598462	-0,00209612697661634	0,000964253759232896	-0,00106783539019594	0,00089838429568531	-0,000481906275761199	0,000101076796679159	0,000391735515729782	-0,000684608794021722	0,00176048036340998
	Gau 7 L,selce_OK.auratus	auratus	1	0,0211198283477853	0,0522364424088786	-0,000638379420710462	0,0398728139898813	-0,00208689186930945	0,0208534383973441	0,00192589465717579	0,00367973906898386	0,00167703752477798	-0,000905271874326036	0,00233807616015153	-0,000212847527215133	0,000830685219240629	0,00279710801571215	0,000169739754604252	0,00352015409712956	0,000555785945094103	0,00167614224160217	0,000646623991062945	-0,000587082554152929	0,00056261039827182	-0,000232893478915685	9.54911e+09	0	0,0367776684974117	-0,0517847424855279	0,00950528731395712	-0,0284439828357045	0,000455977113158184	-0,000178903596619729	0,00185053746765821	0,0045221998284662	-0,00190788227145987	0,00127006564468971	-0,000106392414524261	-0,00207850546615918	0,0032487019063387	-0,0022004171132849	0,00222277886881458	-1.31503e+09	7.27777e+08	0,00104638384891829	-0,00162618359119063	-0,000184007835634397	-0,000423699612225898	-0,00114183175458623
	Gau 8 L,selce_OK.auratus	auratus	1	0,0164562537853525	0,0603151530732368	0,00106569751226184	0,0412347597176746	0,00241438103799558	0,02617744185072	0,00330051012742029	0,00202539300252463	0,00341604458072586	-0,00120384558496976	0,00188741426183852	0,000166001599008201	0,00133135932487409	0,00365006461400694	-0,000627393389474404	0,00150182202501699	-0,000290113208715492	-9.19672e+09	0,000528236162057921	-0,000751704062227973	0,000261462734190848	0,000192474677802203	-0,000401960673774507	0	0,0397480833075786	-0,0422866239168653	0,00651293834541544	-0,0223987404441143	0,00220553160991701	-0,00310810661352339	-0,00140987107046365	0,00245763679668678	0,00042038475273392	-0,000165025808306092	0,000972996795181741	-0,000833476472260695	0,00245794766707057	-0,001647079272623	0,0011126036217382	0,000372551156813851	0,000157324552365428	0,0014280639450971	-0,000379290530776156	0,000984473981076787	0,000206975285144032	-0,000526184205578176
	Gau 9 L,selce_OK.auratus	auratus	1	0,0245076382255957	0,0639007162323615	0,00964972734322263	0,0398227630941699	0,00591038612442541	0,00301425415810814	0,00402861019707876	0,00187518358691235	0,00483176070694226	0,00282496736292231	0,000684038554513714	-0,000614150187918105	4.06517e+09	0,000338723954075292	0,00108379359849767	0,00052247937892219	0,000614452850737411	0,000155324766736477	-0,000890454946848359	-0,000890394046613194	-0,000455493604004509	-0,000118647999671926	-0,00043663180111696	0	0,00712997310736345	0,00377605844990264	-0,0105270791151531	0,0263805189859445	-0,0081490269192275	0,0145535733872255	0,0055895802446294	0,00108990418596217	0,00108417202955466	0,000396423202787256	-0,000159573186078236	0,00173947616137601	0,00142546918959812	0,00109060794127997	0,000448236916944835	-0,00120471796051275	-0,000364779112493813	-0,000887423247480102	-0,000396706168468085	9.43519e+09	0,000463784954228327	-0,000107544375742902
	Gbuc-1-re.bucchichi	bucchichi	1	-0,000446301435321786	0,0351490855741558	-0,0123889166070446	0,0252257544428276	-0,0123485882187816	0,0215889658739624	-0,00148015532790559	0,00608251976849639	0,00216108619878671	-0,000141222638859881	-0,00166406842922673	0,000219148188139816	-0,00441891145569218	0,000722992947480682	-0,00374452921295981	0,00014898716548097	-0,00230532008853933	0,000601745119561543	-0,000947138896412064	0,00103144904383251	-0,000112681746086991	0,000978721307379322	0,000536711473181861	0	0,00183412935266641	-0,0401842927214912	-0,00771576604363772	-0,0394782858675612	-0,0123212247359941	-0,0160713049764557	-0,00957610299071922	0,000185896439556185	-0,00488301319055995	0,00139739936117178	-0,000694253943938246	-0,00158980263436502	0,00177046952106501	-0,000756234397137888	0,0011739512413667	0,00018205714474512	-0,000396334442269002	-0,000347874696896143	-0,000729324540893243	-0,00114137882481289	0,000180421482010429	-0,000564526042474041
	Gbuc-2-re.bucchichi	bucchichi	1	0,00556936000007416	0,0469849303796546	0,00311764307177562	0,0292092107782328	0,000535612924862423	0,0231309253839558	0,00253512118856723	0,00826054067103315	0,00277990141090924	-0,000336779476573079	-0,000117892484442257	-0,00280302767826045	-0,00156319184883147	-0,00228972793001807	-0,00070049063362233	-0,00145336813435464	-0,00109355832328758	0,000163738746644796	-0,000598917576202114	0,000707117963868571	0,000211396223362116	0,000375002470784675	0,000168573209199508	0	0,0134547551437555	-0,0392384024350471	0,00696610249316979	-0,0327714031532777	0,00121277583822973	-0,00849623915092441	-2.44836e+09	0,00209696348687504	0,000185611849755342	0,000192453944291916	0,0014215859723893	-0,00199694086651311	0,00176020377252516	-0,00185566797222531	2.17395e+08	-0,00206789746511558	0,000782292184449625	-0,000833009302313202	0,0015485572815162	-4.66073e+09	0,00068574387000533	-5.06975e+09
	Gbuc-3-re.bucchichi	bucchichi	1	0,00928914723079375	0,0320974885912895	0,00241825168076975	0,0135688335804775	-0,00166963507829918	0,0154414144884563	-0,00135949346421717	0,00896089472798474	-0,000825753197572318	0,00314878810939414	-0,00136321571815821	0,000404101065024596	-0,0017626041868016	-0,00115218303130199	-0,000976680674180212	-0,00151656976010996	-5.85598e+09	-0,00113582082992933	-6.53102e+09	-0,000984775726563393	-0,000275895175914718	-0,000428460654278563	-0,000484182199774016	0	0,00856217118734843	-0,0414994944336122	0,00406529302964313	-0,0362162361852421	-0,00260878939312915	-0,0142007656897816	-0,00527242312459116	-0,00222929802423363	-0,0047662595313123	-0,00110410535814659	-0,00187936079302655	-0,000745818370537596	1.09923e+09	-0,000103361132743034	0,00156435377202899	-0,00151582825935754	0,00258859096788465	-0,00195785328742537	0,00129048161804582	-0,000601564142565848	-0,000142951294767896	-0,000584556634442531
	Gbuc-4-re.bucchichi	bucchichi	1	0,0258908569345826	0,0223538221764552	0,00792053247900467	0,00498536740849587	-0,00208474745963867	0,011109727956929	0,000822193012255725	0,00579126336881767	0,00279143565175322	0,00189542431665179	-0,000807812928831535	0,000576659475148937	-0,00245928025101112	-0,000897177014224008	-2.72881e+09	-0,00245301417708353	0,00130503561676065	-0,0014793814082251	0,000429398312078478	-0,000167795544583094	-0,000483799086670244	6.46046e+08	0,000212355255194822	0	0,0137341893212041	-0,0463591547959105	0,0115662258005517	-0,0444379005080426	0,00201526886660172	-0,0228813508001894	-0,00502650262341741	-0,00724179319416357	-0,00368167091410483	-0,000603346208429433	5.73071e+09	0,00158597728244636	0,000218016040434878	0,00139349344506814	-0,00118420451151253	0,000653386434379799	-0,000137396145296578	0,000390327116969412	0,000575200223112531	-0,000454510591183082	0,000345680631901932	-0,000699126722067796
	Gbuc-5-re.bucchichi	bucchichi	1	0,0119800146081377	0,0443794952812193	0,00306520324522653	0,0241021631284651	-0,00232077427064733	0,0202095697531645	-0,00301977406671857	0,0110486728883751	-0,00105928563750293	0,00306520858781783	6.6774e+09	0,000811777812258425	0,000208379758248293	-0,000511036974410207	0,000988587795642403	-0,000723864075772034	0,000146596011681197	7.80688e+09	-0,00016971206287553	0,00105001762840376	0,000269485748022439	0,00091531565238472	0,000208119829780598	0	0,00137713919181344	-0,0383922592537042	0,00644635712522366	-0,0329048672502949	0,00211088545383145	-0,0138803815522418	-0,00322797981584358	-0,00275741729327385	-0,00517464346153491	-0,00223553684684848	-0,00369186349862563	-0,00276232741404683	-0,00117071178527698	-0,00190584700397065	-0,000120246744606757	-0,00205709415979259	0,000500882701457707	-0,00201424742034281	0,000733619986668	-0,00110367756377505	3.34228e+09	-0,000310182754655974
	Gbuc-6-re.bucchichi	bucchichi	1	0,0151262444401535	0,039039032000704	0,00557059549059566	0,0253553009082719	-0,00254158044543568	0,02305698567977	-0,00311406745994847	0,0117697031420641	-0,000576062531155413	0,00270087093386216	0,000273905705938962	-0,000963098417609241	0,000881513199409031	-0,000415264812263243	0,000906123282545138	-0,000154734846955222	0,000516879692864465	-0,000596302454653235	0,00010106945851653	-0,000184650735367264	0,000595934453185935	-0,00013872855984663	0,00101240282290707	0	0,00632990075030026	-0,0378792903749844	0,0053884565492146	-0,0367685284800516	0,00237391116047094	-0,0143480302561579	-0,00105546205499133	0,00173640266228488	-0,00131439261172295	0,00231751057388639	0,000361379368474371	-0,000587455619224169	0,00139020434389816	-1.77119e+09	0,00189803736581664	-0,000459912876144416	0,000834410443647103	-0,00131428190248186	-0,000413300525682164	-0,000579210817182654	-0,00016957163407262	-0,000314371823103236
	Gbuc-7-re.bucchichi	bucchichi	1	0,00876126692825687	0,0243847903119361	-0,0102162674115261	0,0119176537369011	-0,0169844737893213	0,0140426719527018	-0,0075136993104847	0,00871013435171915	0,00124774130860373	0,00329383197209055	0,00296501997036545	-0,000416440753805797	0,00274449010272719	-0,00151574868005387	0,00126217057936471	-0,00138213789945968	-0,000642573007161349	-0,000334140683757332	-0,000408138102062537	0,000431514350344349	0,000205124979096537	0,000566147215509453	0,000161201574146429	0	0,000513387507803752	-0,039972375813524	0,000233284447930258	-0,0397804506074372	-0,00531657014850745	-0,0210321844997069	-0,00750359149305564	-0,00414924059716622	-0,0075453311645047	0,00164446485090352	-0,00226820247907484	0,000503456466458004	0,00141773993745793	-0,000276851970426425	0,00186483602011889	-3.31716e+09	0,000472494056275277	-0,000806647588504194	-0,000496632941934901	-0,000561593789012313	-0,000316205198885889	0,00042484906869165
	Gbuc-8-re.bucchichi	bucchichi	1	0,024276110432853	0,0364376640759396	0,00893501287074606	0,030741273271377	-0,00214607279952532	0,0243441177779733	-0,00172485615225328	0,00810050486373222	0,00333147445092361	-0,00242050572381787	0,00306980786678104	-0,0025005371035893	-9.99863e+08	0,000924305974367664	0,00120918389087774	0,000350487126320627	0,00143397507849101	-0,000602566988976961	-4.47431e+09	0,000180881189457565	-0,000374063968118703	-6.99487e+09	2.93628e+09	0	0,00885612034834254	-0,0316591057759406	0,0118865252581469	-0,0299868917614151	0,00561938084737333	-0,0120235463948311	0,00254780659563559	0,00304770293757477	-0,000352932605646692	0,00454377837944308	-0,00219999305526779	0,00139230979591038	-0,000924624998626557	-0,000379164890856493	-0,000163294909856153	-0,000748494763321354	-0,000149631454659009	-0,000144547344266005	0,000497232957585567	-0,000322835588431337	0,000998954362418688	-0,000169980180070273
	Gbuc-Ostro-re.bucchichi	bucchichi	1	-0,0107685996622257	0,0351367940366623	-0,0183024213407446	0,0264033024386134	-0,0103556204499508	0,0204047289595929	0,00481967203731584	0,00451528881734099	0,00233988558944676	-0,00265043725302549	-0,00146202820920974	-0,00261885750862315	-0,000317183636111418	-0,000430532141410239	0,000220970179360755	0,000946175661596901	-0,000561060074516022	0,000667185838309132	0,000156793384132552	0,000306531491822579	-0,000106598526376289	0,000105694285165718	-0,000529136461969678	0	0,0100315286983238	-0,0437762404563213	-0,00616235905073397	-0,0340687932948329	-0,0142541775092514	-0,0086886054175591	-0,00640093790950504	0,000661217705368764	-6.34202e+09	0,00122623162631459	0,00154491659060282	-0,000234673006786502	0,000280597658217664	-0,00180737982331144	6.12107e+09	-0,000557854180901996	-0,000162049026957326	0,000842304731105345	-0,000472924199182822	0,000181909340542324	0,000101102590296049	-0,000302938626914644
	Gbuc-Selce-re.bucchichi	bucchichi	1	0,000963599446962881	0,0442173464172724	-0,00265265611822392	0,0320572549699653	0,00183251666424645	0,0251876215107678	0,0059673738172251	0,00679317461471082	0,00277884698121945	0,000187890611624703	-0,000225601706278134	0,000407062350956845	-0,00122282239855263	-0,00170877327476505	-0,00101010710705462	-0,00030973531114983	-0,00152102487517066	0,00119960271538162	-0,000627469481030459	0,00122092318280839	-0,000542010436904724	0,000696872527710788	-0,000410612441063062	0	0,00864129224806831	-0,0352132532802836	-0,000127713559535248	-0,0286002773438453	-0,00769425573432277	-0,00698111292588948	-0,0055821147499865	0,00157336844234268	-0,000666561875597092	0,00336202499735056	-0,00151478973684685	0,000288166927003226	-0,000894462801691117	-0,00105686452726341	0,000410867932020127	-0,000530853202295819	9.63054e+07	-0,000408946111677526	-0,000213592249592642	-0,00019921649715793	0,000312731494884228	0,000152839706842053
	Gbuc Ostro l gedreht.bucchichi	bucchichi	1	-0,00577254321020212	0,0443288376084109	-0,0108401916886749	0,0237140512117758	-0,00453577158757303	0,0193530121599108	0,00489039149567309	0,00703468925314891	0,00459010452848302	-0,0017900170841318	0,00151809050249821	-0,00393882783351076	-0,00102829548911425	-0,00124354119070745	-0,000921785920717973	0,00131579043709318	-0,000227712748330494	0,00133633973361643	-0,000335640196751861	0,00086734111336592	-3.04904e+09	0,000843226387948133	0,000152181305169729	0	0,0181435586135189	-0,0411833956741614	0,00141277348928339	-0,0367242554330448	-0,00664806019503895	-0,01339070017945	-0,00351631138988425	0,0015984736527494	0,00180827991335207	0,00251938678029842	0,00302943670168876	-0,00273817860765068	0,00258848823386454	-0,00226542634475878	0,00136719559673045	-0,000945021355149981	0,000541146039587816	-0,000539226835196346	0,000795588115643444	8.20693e+09	5.97895e+09	-0,000372898439492531
	Gbuc Selce 2013 l gedreht.bucchichi	bucchichi	1	0,0039576811602976	0,0475028769978694	-0,000766356964062171	0,034539134051438	-0,00120843057498531	0,0286705157916721	0,00597947522366556	0,00783307942009406	0,00308623658684922	0,000184843827635226	-0,00136285142540096	0,000166714598444341	-0,00371234710898706	0,00110321112912149	-0,00240826717480133	0,00178306521774146	-0,00241812323446511	0,00225056001894794	-0,00130962882843652	0,00227051434508441	-0,000280573912493273	0,00105066918992424	0,000430058619339192	0	0,00200923780541783	-0,0320405970167508	-0,00265170675321596	-0,0265117619744462	-0,00859761343340153	-0,00787982744095179	-0,00503508323716371	0,00127712311512171	-0,0018169985503399	0,00253908526430772	-5.76524e+09	-0,000225717895821705	-0,00146369879453879	-0,00218214756569838	0,000287986885965951	-0,000852286918417616	-0,000619637319368534	-0,000403069165334312	-0,00119404237408895	0,000503280327214548	-6.3705e+09	0,000596229795778612
	Gbuc Selce 2016 1l gedreht.bucchichi	bucchichi	1	0,0078723362526842	0,0493184762559147	-0,00384057896638532	0,027840937114525	-0,00502093274990777	0,0181210386379401	0,00367500819661097	0,000107257715357432	0,00393229689458039	-0,00316692503903651	-0,000890027031516151	2.73847e+09	-0,00190981746940001	0,00134137371721487	-0,000774650968840138	-0,000764348901544457	-1.64741e+08	-0,00118450122234319	0,000466436727593509	-0,000560065832621002	0,000418804690324261	-0,000120285029636005	-0,000238201702007472	0	0,011819722985366	-0,0336660972117794	0,00243552096363834	-0,0290295348251191	-0,00760336307592533	-0,0054511050088721	-0,00524820604043262	0,000714195802728434	-0,00192598523791537	-0,00268486561825632	-0,002288859212467	-0,00326233848276787	-0,00258377585416401	-0,00117352387748859	-0,0016985001090997	-0,000501220742814604	-0,0009416382922938	0,000231096871681096	-0,00126614969919412	1.77029e+09	-0,00117392247778869	0,000306117528539941
	Gbuc Selce 2016 2l gedreht.bucchichi	bucchichi	1	0,00824161295935865	0,0530701646673497	-0,00356540434667397	0,0305843567567243	-0,00185347047657941	0,0230298510679038	0,0023000835179464	0,00865093554168506	0,00199170478391271	0,00101456363830952	0,000519759100238128	-0,000834151380620291	-0,000319668963548082	0,00049779092975919	-0,000778911974062316	0,00151929711603078	-0,000770699790735524	0,000987053686902463	-0,000603670519952282	0,000631215444588705	-0,000203082523063041	0,000249554477976511	0,000207175414737308	0	0,0161265037328678	-0,0400881370173035	0,0029987723703237	-0,0322284324932122	-0,00307373958703544	-0,00845731605833802	-0,00156895492404796	0,0016521478381483	0,000727064085848204	0,000767231376063273	-6.35259e+09	-0,0027747095241742	-0,000206970953635465	-0,00357411650770601	-4.04524e+08	-0,00236811336292695	0,000150407323656023	-0,00120448011370698	-0,000106776390603253	-0,00100421068136093	2.63742e+09	-0,000520314396483105
	Gbuc Selce 2016 3l gedreht.bucchichi	bucchichi	1	0,0118108684647249	0,0374824216513563	0,00150992564037118	0,0234765193464446	-0,00143182205776898	0,021730797413842	0,000152340830399965	0,0105073457589818	3.34507e+09	0,00340671246248162	-0,000235185641505241	0,000309084410403133	7.80927e+09	-0,000957193332746115	-0,000370151799912321	-0,00135613601834329	-0,000313239751329558	-0,000729882523195932	0,000520807865320833	-8.97093e+08	0,000572101708265264	-0,000293300536597031	0,000213381780240214	0	0,00746221280340866	-0,0351968850273981	0,00371569978461676	-0,0347723793746783	0,000928584108842795	-0,0129539943044479	0,0015352050833353	-0,00220851430458367	0,000720935312242061	-0,00147271058137619	-0,00228346677092332	-0,000472826803614761	-0,00212239497909729	-0,000146379983460074	0,000106497629568656	-0,00237620616380837	0,00161661333622885	-0,00322077374051702	0,00107698872651807	-0,00198483549785415	0,000324646979542167	-0,000579604173988979
	Gbuc Selce 2016 4l gedreht.bucchichi	bucchichi	1	0,0201807963924484	0,0380166607427998	0,00512396239115938	0,0158315199453691	0,00037001664619174	0,0143252233438905	0,00393086113221883	0,0089282507856091	0,00491585984046545	0,0029070498355625	0,00106622680415661	-0,00107987942435708	-0,000700555571225635	-0,0018234455471653	0,0012766773774629	-0,0017989047627106	8.17782e+09	-0,000925609242962999	-0,000771375727783402	-0,000620066896323768	-3.05932e+09	-0,000797494497381926	-7.54531e+09	0	0,013146397340906	-0,0369788161440283	0,0114049481370295	-0,0352125325793853	0,00349423871713206	-0,0161130822959146	-0,00326986469443389	-0,0039787379970649	-0,00290799968593768	-2.49385e+09	-0,00125263873548136	0,000535588630250526	-0,000380555193464877	-0,00127553319220789	0,000812999508288543	-0,00216694089342544	0,000926858883523667	-0,00058651462171661	-3.4306e+09	-0,000294536217125702	-0,000502384967563968	-0,000195660819739487
	Gbuc Selce 2016 5l gedreht.bucchichi	bucchichi	1	0,0176528580803765	0,0674882364969803	-0,0176568752462894	0,0340382905131385	0,000618476075996791	0,0204698513996596	0,0082905230044618	0,00658151304386682	0,00592938929195342	0,00416509231903494	-0,00187791848035681	0,00017372587277777	0,000946399323371579	0,00137819006200176	-0,00318090537173538	0,0029430855789485	0,00101631196983833	-0,00145716436910292	0,00114214228179253	6.41846e+09	-0,000230828570639857	-0,000335442593056084	-0,000475931253355467	0	-0,0290933417316819	-0,0113647377393715	-0,00560755431130896	-0,0195025154339353	-0,0121327605167026	0,00135292425280415	-0,00635633938682535	0,0013174336528425	-0,000111729915630579	-0,000692688264875481	0,00194191857053435	-0,0026901170490433	-0,00191332259332505	0,00158350076259406	-0,00258477782773013	-0,00193515005915964	5.06748e+09	8.50049e+09	-0,000838823483980337	-0,000499422400046624	0,000774552776924753	-0,000805074576520504
	Gbuc Selce 2016 6l gedreht.bucchichi	bucchichi	1	0,0229694760383265	0,0350301829067266	0,00162208362093865	0,0260037378984669	-0,00453364399347326	0,0235793048208291	-0,000149338989590446	0,00868617020375713	0,00325146024188987	-0,000587505960262009	0,00129134195243578	-0,00345564423800268	-0,000592390512085174	-0,0025975847064712	-9.50601e+09	-0,00182598443046535	-0,000476244302970374	-0,00148816671875653	-0,000578751446136389	-0,00057806393419438	0,000509399694135906	7.05167e+09	0,000915503188128654	0	0,0214277866549237	-0,0419024629380138	0,0128987705859681	-0,0373801794031865	0,000653675772970147	-0,0125661744365795	-0,00257096160869239	0,00276650207260058	0,000464047144307159	0,00082068695287504	0,00249486333602125	-0,00263285036750224	0,00276566261095108	-0,00195427244409595	0,0023082991009388	-0,00132455783084458	0,00117609921785766	-0,000828490921275794	0,000172353409029242	-0,000855531009770505	0,000257272580968607	-0,00103917124879088
	Gbuc Selce 2016 7l gedreht.bucchichi	bucchichi	1	0,00956579108948069	0,0224372017204181	-0,0183156783047815	0,0072381161860257	-0,0161303197188866	0,0123642235070661	-0,0094426810448193	0,00936478347701576	-0,00072517673209295	0,00377123837736446	0,000724232373865864	-0,000178023382238796	0,00116474875443914	-0,00322476199030365	0,00103453883927134	-0,000364704742790026	-0,00139070907448931	0,000409362944803881	-0,00060029915277153	-0,000224780641164327	-0,000401338563588789	0,000365206569018046	0,000247962800867703	0	-0,00212434978665529	-0,0302872767121263	0,00407854819620055	-0,0402198087006725	-0,00686447313716479	-0,0198595594744515	-0,00782536689067591	-0,00541686531510831	-0,00242011523947915	0,00156970202713226	-0,00156962272233456	0,000587085845918223	0,00106672612210486	-0,00141430492803456	0,00108487638393593	-0,00175930748677842	0,00146520233334038	-0,00198977378144548	0,00077186378672934	-0,000332287246747312	-0,000506221788785067	-0,000609632792231858
	Gbuc Selce 2016 8l gedreht.bucchichi	bucchichi	1	0,0131652202237694	0,0428872840648433	0,00280840833518662	0,0314119564849257	-0,00269647129291618	0,0214373399296352	0,00145268481320443	0,00542357793868588	0,00315291149718996	-0,00107721292157457	-0,000667323110778935	-0,00119962174825857	-0,000936348057826172	0,000700830164165316	0,000962115218209159	0,000968523182456475	0,000390492128539387	-0,000109459157606861	-0,000530332395677488	0,00025006093466284	0,00046296265210527	-0,00017285393475463	0,000573530751312371	0	0,00402736583500051	-0,0392727579380251	0,00683513737090214	-0,0306977554262521	0,00739948745402299	-0,00940614144361369	0,0012309861661695	0,000428818288020028	-0,00230474865357856	0,00200486522126205	-0,000558767531899882	-0,000386942551831939	-0,00133921660214915	-0,00143790739421496	-0,000598542633927824	0,000149342352874285	0,000857541255553046	0,000674426518205554	0,000675531346707553	-0,000666441688425708	4.81229e+09	-2.51759e+09
	Gcob-CG-no10r.cobitis	cobitis	1	0,00843879272306079	0,0525594886218219	-0,00756947673785185	0,0124735257034857	-0,0120229232848487	0,0031271175310925	0,00657529663591745	0,00249043126668753	0,00166858452265457	-0,00485763924545443	0,00356098912642152	-0,00270081440691432	0,00184326876467419	-0,00629774481914584	0,000461539108714792	-0,000118373301199199	-0,000662013011671751	0,00117295569940646	-0,000359053083217478	0,00126411353820024	0,000582653702599418	0,00154447517280783	-0,00213785149900083	0	0,0208769705787475	-0,0694951817137503	0,0233986446943141	-0,0265887797701802	-0,00387694148825242	-0,0172855464303575	-0,0102747473010925	-0,00203047485377074	-0,00111690265409106	0,00018813541629444	-0,00542166526487198	-8.81152e+08	-0,00206271919216714	-6.35334e+09	-0,00231621133285894	-0,00350542625453671	-0,000579825706921195	0,000213602579347664	-0,000568671300452614	-0,00115363334735052	-1.78838e+09	0,000276926141355502
	Gcob-CG-no6r.cobitis	cobitis	1	-0,00449862250403788	-0,0203162757330723	-0,0169926600699903	-0,0265836682723125	-0,00917668567990834	-0,01042293561525	-0,00282018071486639	-0,00133889896902497	-0,000575985902597346	0,00252118339654994	0,00159737095723996	-6.43462e+08	-0,00353541243051414	0,00411712272350114	-0,00343252253664959	0,00549956859999928	0,00209381986665284	0,00290514888645688	-0,000799010635630209	0,00112779849880446	-0,00283531595819281	-0,00138151455297474	-0,00103892666624242	0	0,0175132355345317	-0,0756318961948762	0,0240535615706777	-0,0447623064025185	0,00577983926483422	-0,0180012656187291	0,00427949500669024	-0,00232009899443166	0,000204960601569109	0,00789589633919609	0,00278159549050521	0,0067230284037833	0,00452353625001348	0,00209221281431529	0,00125369193844851	0,0034973791894262	0,00171655558829073	0,0016813261147092	0,00544818249163909	0,00153724937875065	0,00190784328528148	0,00275644828881402
	Gcob-CG-no7r.cobitis	cobitis	1	0,0134242819250192	0,0494120929662928	-0,0151007204403757	0,0372343289725481	-0,0100096187340514	0,0165852608259001	0,00600999137523181	0,00203846005309739	0,0033996424073704	-0,0023929216293533	0,00182655589257486	-0,000374851658532266	0,00105388179333646	-0,000355412678019691	-0,00176768451394502	0,00157996703789111	7.29103e+07	-0,000221991102508362	0,000880116233105008	-0,00089591720857667	-0,000681377089318432	0,00126014011140814	-0,000323943425657528	0	0,0215112803448095	-0,0314768769246848	0,00609900295049221	-0,0291730742973641	-0,00528364974584049	-0,00718685991852136	0,00385320951225355	-0,00401145496244725	0,00470167189463937	0,00215996406016317	0,00313722481077673	0,00267292211609512	0,00373271947939998	-0,0023805420991258	0,00413770453611967	-0,000433738005658729	0,00138551741267297	-0,000558088351242621	-0,000344459064477501	-0,00155535180384185	0,000481465311685794	-0,000306550566774914
	Gcob-CG-no8r.cobitis	cobitis	1	0,0135142996487259	0,0471364139516723	-0,00755151397732017	0,0189083451288768	-0,00115133486998892	0,0113593109990028	0,00613152626208908	-0,000754855944959767	0,00475089645690833	0,00085890059252809	0,000906372751489475	-0,00187667919037064	0,000120336822784824	-0,000676144210767422	0,00221301119883934	0,00205365324791629	0,00121950372006551	0,000323061718003203	0,00115648559335607	-0,000911132285379906	-0,000504201381620803	-0,00154847995010774	0,00248183182253607	0	0,0211355411965815	-0,0507411615438354	0,0134019382404787	-0,0363453984728869	-0,00821896191536257	-0,0111724023444488	-0,00969040542794444	0,0012429593550651	-0,00467907263078814	0,000930877394290159	-0,00048435307602986	-0,000657490096467012	-0,00263132035608986	-0,00200361309559884	1.49996e+09	-0,00241904475818406	0,0023907947586613	-0,00254566236167389	0,00176166733214669	-0,00185518858900838	0,000356823246867177	-0,00062950274226895
	Gcob-CG-no9r.cobitis	cobitis	1	0,0160273216456903	0,0337769420176108	0,00828038721666777	0,00545523349617907	-0,00511108448848315	-0,00136806515794768	-0,00592696810455117	0,00636307143893692	-0,000579168959642512	0,00771793626213221	0,00197727201268655	0,00176416326559027	-0,00566965073204388	-0,000257974217343114	0,00409266552609583	0,00276931242473719	0,00386708788175939	0,000977732415141827	-0,00126004180977352	0,000610869211640551	0,00188625455815157	-0,000396194398649852	-0,00019528387207356	0	0,011613102112923	-0,0722280244695695	0,00575632685366483	-0,0289388340090228	-0,000498958241350413	-0,00849453944740784	-0,0103489744927291	-0,00574549541344111	-0,0125414674250085	0,00381348614309465	-0,00151357578141041	0,00146681880213457	-0,00401282228384116	-0,00279845586192972	-0,00571955677849389	-0,00229722934472142	0,00200382856971625	-0,000614084405470037	0,00117793486569702	0,000211916592683759	5.47387e+09	-0,000769650811792101
	Gcob-J850-aug17-no1r.cobitis	cobitis	1	0,0198968850580844	0,0828987049958881	-0,02622025817576	0,0312979235123019	-0,00525361801929701	0,0120851182078949	0,00482738166333167	0,00409704548634857	0,000239519541409231	0,00304166971531969	0,00521532189178836	-0,00065514755244676	-0,000687396188851994	-0,000478726160334216	-0,000174368166462472	-9.32732e+09	0,000728478234663303	-0,00155244975431398	0,00253332089130149	-0,000923006145966262	-0,000396091382018698	-0,000141994657788628	0,00114533180051937	0	0,00922806404039359	-0,0466929812092333	0,0119669127586647	-0,0342521025493835	-0,0101466328083347	-0,00631380539288733	-0,0124755052804362	-0,0046098926877949	0,000886004504239546	-0,00305541368541011	0,00427210924460858	0,00235327360451174	0,00201316768929	-0,0014721756064358	0,00287121738737493	-0,00226705638478191	0,00146448061556793	-0,0001500358116254	0,00224524402452849	-0,00172776779200217	0,00188296871681414	0,000528109805666689
	Gcob-no1r.cobitis	cobitis	1	0,026395909003516	0,0473702219934675	-0,00259354161863457	0,017352052667323	0,00768033932784052	0,0134919441413113	0,00717363449374221	0,00889791967213929	-0,00239112904593741	0,00480744365330161	0,000693748547210131	0,000112499653697398	0,00012731959768617	0,00254852392031871	0,00057144317540013	0,00122403990397615	-0,000948098826894156	0,00242936671319405	-0,00231967315429709	0,0012002417639704	-0,00149367183655735	-0,00118687462098347	0,000141164467489636	0	0,0401907341895736	-0,0517802248483654	0,0161196911234251	-0,0368064944986842	0,000338594379768386	-0,0125686736319586	-0,000735283558250003	0,00208571812629209	-0,00276324034641615	0,00752326482121313	-0,00393917238700718	0,00136508713616712	-0,00453717654259734	0,00211704608750913	-0,00204044606277415	-0,00040259429949156	0,00383042388538648	-0,000492607966784666	0,00153964985004919	0,000963897348910287	0,000307693643145064	-0,00117496018107114
	Gcob-no2r.cobitis	cobitis	1	0,0264246568314004	0,0469715349593684	-0,0195813397614709	0,018305875851661	-0,00432619925663638	0,016235314542732	0,000430069115613391	0,0056629059336275	0,00262798112917631	-0,00310442154529337	0,000708174769605181	0,000497387880007331	0,000856759397015503	-0,00220625037363362	0,00273117947706653	-0,00190567169172507	-0,000459832036503292	-0,00271220846010868	0,000391510286855235	-0,00244176988686563	0,000665719055204947	-0,00187798845509705	0,000745548388395496	0	0,00635293089209539	-0,0532834410352231	0,023904905376134	-0,0444947150216329	0,00389200882096663	-0,00884804606112741	0,00382457155170877	0,00143083401749452	0,0024429943181885	0,00286621381372673	0,00191678265453434	-0,000311349622117878	0,00316188762433665	0,00175373216137114	0,0010040692020419	0,00216962862415947	0,002831196947967	0,000189141292323748	0,000294477852152268	-0,000391042127038365	0,00115914623943115	-0,00102449541980888
	Gcob-no3r.cobitis	cobitis	1	0,0167253538441602	0,0340704118948919	-0,00603829349234605	0,00744719904431607	0,00233897840531319	0,00897529886171789	0,00504453662894807	0,00455453763430355	0,00500282945517141	0,00160443905556309	0,0045728982155352	0,000495207493811487	0,0014091949498338	-0,00178775206222753	0,00481766285182335	-0,00184744279238799	0,000885078307841265	0,00127575387577352	-0,000775571089096848	0,000260117267679074	-0,00146130772476868	0,00098477961857142	-0,000864406283819087	0	0,0284776367797168	-0,0582112289768258	0,0169417065827551	-0,0423471120636628	0,00262617613965599	-0,0185668837270901	0,000312534549641838	-0,00291452336708666	-0,000518086028536192	0,00453807925466929	0,000567700396448692	0,0059538819957889	-0,0034633936364378	0,00564782647996291	-0,00359116683723435	0,00117946172956946	-0,000326867292386405	0,000369944134092983	-0,000942544515459994	0,00103630977335227	-0,00153987472199025	-0,000148043095794351
	Gcob-no4r.cobitis	cobitis	1	0,0174472044404648	0,0497078339060633	-0,0159861292518419	0,0221782540114093	-0,0063902520890533	0,0116363935076213	0,00035138117269572	0,00208950548043712	0,00413436040356894	-0,000721159198784216	0,00433111383436638	-0,00300057037292687	0,00408085480652452	-0,000563786673216724	0,00206909925542677	0,0012262088035132	0,00127653097297231	-0,000323119979438425	0,000615773203387462	0,000666219669931292	-0,000650919742882464	0,00131491870328247	-0,000629315683559303	0	0,0172319095923796	-0,0374729169940049	0,0010200156049572	-0,0366094226932829	-0,00455351693805582	-0,0157956885399832	-0,00943227704569854	0,00319500579703913	-0,00359436664868776	-0,0023963367989694	-0,000675896209019705	-0,00384513177669599	-0,000855883101258474	-0,000861141696287239	-9.49907e+09	-0,000610023205759912	0,00102123402586123	-0,000510314833626748	0,00026267417247349	0,000624743628209665	0,000170749348187666	-3.27599e+09
	Gcob-no5r.cobitis	cobitis	1	0,0059238800330494	0,0423408850572414	-0,0146578673851713	0,0176753131828703	-0,00508800040003572	0,00580688981330166	0,00291335518568511	0,00124439096604485	0,00121020282647206	-0,00463949573292188	0,00577589293673702	-0,00311442605649235	0,00428655871267493	-0,00113227848364842	0,00403919866817736	0,000627681676986905	0,00600589519238796	0,00159976976524522	0,00275822078778052	0,00255699759179111	5.75494e+09	-0,000717856297955578	0,00098439730132904	0	0,00239379008313494	-0,0425998107667719	0,00847503643845581	-0,0399235537119473	0,00218201137626539	-0,0115310249843378	-0,00503084897971246	-0,000682302078185284	-0,00399569849605013	-0,00194352830470519	-0,00307188208294358	0,00174921530050442	-0,00101905819689638	-0,00135386945276925	0,00221546041951367	-0,00142535869780439	-0,000286058213199526	0,001349441959514	0,00211229383425235	0,00190671420716103	0,0015057249320623	0,00371264443366106
	Gcob CG no10l.cobitis	cobitis	1	-0,00170568968402984	0,0823375647768275	-0,028043836416751	0,0174174605451527	-0,0192409699151735	-0,000357776430579874	-0,00739634591176145	4.46349e+09	0,0040327285300899	-0,00196219110875118	0,00370937490413517	-0,0037969205205294	-0,00329308494373669	-0,00341544046362328	-0,000209694706406222	-0,00163511310571528	-0,00154350373614272	-0,00564135042118175	-0,00245967805094903	-1.28085e+09	-0,00136937325949032	0,000761409285945641	-0,00146310290321824	0	-0,0345227340292495	-0,0650792910247385	0,0145880534264231	-0,0247804291435766	-0,00242704191093758	-0,00978610183796122	-0,0103463548424334	-0,00523865244528963	-0,00360993684578406	-0,0022748916663871	0,00317330464019465	-0,00220808848603799	-9.66387e+09	-0,000250806345794558	-0,000483409077994776	-0,00251851942279117	0,00263171726416422	0,000988946785131966	-0,0039624052838524	-0,00229912280647194	0,000171443514069066	-4.69008e+09
	Gcob CG no6l.cobitis	cobitis	1	0,01086175450163	0,0212291232126268	-0,00921649537539053	0,00573041959951289	-0,00817052077841566	0,00683607463849304	-0,00544951540482483	0,00120321737917374	-0,00459339033924463	-0,00244383406373358	-0,00155081998826107	-0,000671315814764836	0,000204798678556355	-0,000123397947869534	0,00209453195950429	-0,0041499562450788	0,000688522074704904	-0,00303504297325331	-0,000918379783127572	-0,00238484656432308	0,00182293084912939	-0,000209884595857645	0,000315662359934698	0	0,0172122024212858	-0,0744822710090629	0,0178696801572624	-0,0453133366958687	-0,000272425601290331	-0,015581494009129	-0,00060106739441485	-0,00135836031924052	-0,00387099763469859	-0,00281445240398009	-0,00278742584943075	-0,00397912108302474	-0,00270227335725312	-0,000751615910673971	-0,0021442869785046	-0,0014999553929973	-0,00145795553340116	-0,000697393523441014	-0,00299494528982782	-0,000262905082715657	-0,0027134696982403	-0,000258628709141356
	Gcob CG no7l.cobitis	cobitis	1	0,00832295136905379	0,0577592624690858	-0,0211076729611416	0,0253760011853106	-0,00693902621471129	0,0108206634590791	0,00463324748206284	-0,000193199104737852	0,00231112847286286	-0,00177111808675333	0,00272902123121961	-0,00334405422772217	0,00365488022434237	-0,00202039823858954	0,000680817304658685	6.59861e+09	0,0020552413668365	-0,00041784643844283	0,0036503063049307	0,000533283760480322	0,00109679381793733	0,00125088267956806	0,000866802809215358	0	0,0135999594165879	-0,043832432041594	0,0128617328653305	-0,0361004267632681	-0,00179292489182895	-0,00615901878421806	-0,000765646037159983	0,001799152526782	-0,000395007020800993	-0,00116706565521756	0,0061472216174986	-0,000632504416786086	0,00319568369576984	8.40697e+09	0,00240161583950153	-0,00080354767040416	-0,000189443988500072	-0,00184116525559133	0,00126590926290855	-0,00108649996339181	0,000112360758452582	0,000782997701029078
	Gcob CG no8l.cobitis	cobitis	1	0,0197858328319776	0,0568226641485374	-0,0132090033541926	0,0079694448226011	-0,00585494735843502	0,00571039391750344	0,0009411056069611	0,000388774864290231	0,00220804510046695	-0,00319909525527707	0,00764592512531367	-0,00150805124131344	0,00301957329223416	-0,00243494734817339	0,00378267076472444	-0,00323963144421421	0,000914164130191095	-0,000207765549124205	-0,00101532421282148	0,00179456278676415	0,000206492552863415	0,00186000033200629	-0,00115655870943858	0	0,025990596468361	-0,0553776857759737	0,0161559873528461	-0,034882927204799	-0,00283927886488329	-0,0204834171151044	-0,0061058183624108	-0,00339109137965388	-0,00648102284695017	-0,000909700572654543	-0,000827401487427278	0,000226869597999579	-0,00164994210217428	0,00567932821552921	-0,00441672768320859	0,000598108046326074	0,000356405506749795	0,00147371811744324	-0,00203284545360669	-0,000215816384756579	-0,000620726058246975	-2.22976e+09
	Gcob no1l.cobitis	cobitis	1	0,00868496538280839	0,0535024140541185	-0,0129485764710313	0,0207096184144927	0,00297732094620907	0,00730183841363723	0,00455134563336723	0,00517961165013814	0,000529228823162989	0,00268110755206676	0,000357815253012439	0,00124868337771735	0,000814221439618569	0,00365189895265053	0,00272668798292934	0,0019212586361333	0,00169132172837854	-7.33937e+09	0,000924996800263065	0,00120545652445648	0,00209283658715967	0,00171310745066742	-0,000701807934640613	0	0,0333699635274236	-0,0527804395228748	0,00984309930233154	-0,0360626094409416	-0,00263219952496939	-0,0197817925829326	-0,000249764581426527	-0,0086350299672683	-0,00146021833646357	0,000615118872236934	-0,00313910874797674	-0,00212829451491956	-0,00239852143654491	0,00160897659819482	-0,00430521551668939	0,000497964367032314	-0,000162255783413494	0,000460760569300126	-0,000832235241254738	0,000927117731275492	0,00131417481657178	-0,00114278335980982
	Gcob no2l.cobitis	cobitis	1	0,0106783992365961	0,038783728429357	-0,0138529716004814	0,0260637193534216	-0,00729027176460307	0,0157734955757686	-0,000115066830215786	0,00753227373458825	0,000453113865207258	0,00279133990472078	0,000571726800036464	-0,0011395772970499	-0,00146376488134632	-0,00236012284265834	-0,00106195201484441	-0,00114736925260663	-0,000684131201421598	0,00126941787632757	0,00116220836360233	0,000465456903708777	0,000911130187942133	-0,00052526788466277	0,000794709913517695	0	0,0214550219306356	-0,0548474883723841	0,014351993633955	-0,0375255265903914	0,00353456131242958	-0,00876260166504096	0,00217600329723348	0,00298526952321944	0,000562656286642306	0,00637308926628647	0,00320484968701302	0,00280907607533491	0,0059042199904129	-0,00071028689034696	0,00171912052953005	-0,00197089444459705	-0,000206135569594375	-0,0014637003669191	0,000214541762203019	-0,00113868335094738	0,00123167735801402	-0,00149103194918267
	Gcob no3l.cobitis	cobitis	1	0,00934120189283157	0,0480220078816735	-0,0114439529509162	0,0230351786028519	-0,00187825360083386	0,016224510353763	-0,000218116498950982	0,00772862095492622	0,00128639990830294	-7.56471e+08	0,002549271116321	-0,000999230506403947	0,00183861871218682	-0,00378838730471164	0,0018437102425227	-0,00226651894709454	0,000965453864635445	0,000331099728287905	0,00168267595618133	0,000899526487508465	0,00107712586988039	0,00111426482887293	0,000538374934428104	0	0,0258510991588647	-0,0532928442610489	0,00921867177320038	-0,0387547689033827	0,00285649813540905	-0,0128672763221162	0,00411123987907528	0,00015033732156565	0,00182868173889363	0,0047630658828956	0,00377938195133682	0,00277335268083299	0,00293034566217517	-0,00122104279249707	0,00184161411447575	-0,00174715733199746	-0,000317480264498437	8.49932e+09	-0,000198118476369675	0,000511953564192863	0,00119916229653036	0,000837330577166238
	Gcob no4l.cobitis	cobitis	1	-0,00301307552389625	0,0692335640362474	-0,0148857513178884	0,00687156421169097	-0,0174565912599762	-0,00255904081524066	-0,00608342970708495	0,000521979079592941	0,00357375176651317	-0,00797652796498508	-0,000110715399997203	-0,00522489692873304	0,00344200761691099	-0,0055873655136878	0,00153765314840726	-0,00336978861595081	-0,000322673730628626	-0,000872706287447896	-0,000296108119243183	-0,00186668267071657	-0,000538878193695129	0,000940115760630271	-0,000283681812260387	0	-0,031669083686402	-0,0631863639037241	0,0102564026241076	-0,0235351912213168	-0,00386776185727838	-0,0167402246184093	-0,00715831122832465	-0,00556519764659642	-0,00033737037257306	0,000890553630323834	0,00164441088586646	-0,00328139420640163	0,00108494478845688	0,00209672435156965	-0,00104556898062467	-0,00292679083453306	0,000439579873027503	-0,000731129311614855	-0,000459212831037601	-0,000932996994948559	-0,000940830616427806	0,000270363251311461
	Gcob no5l.cobitis	cobitis	1	0,0117925589870153	0,0501669610771	-0,0187219072522895	0,0191536622164518	-0,00289655000711058	0,0127672956536859	0,00251456683832985	0,00376297824116654	0,00456270257154846	-0,00327761698429699	0,00121585377061023	-0,00518775706740344	0,00577088386830456	-0,00638961735582578	0,00496577325178903	-0,00164265394686436	0,000901150378554032	-0,000689002696895289	5.01951e+09	0,000731296239598206	-0,000718858264515943	0,000310351235378271	0,00153923731933767	0	0,0162974398332548	-0,0434598180309713	0,00288365248611082	-0,0379705380100928	-0,00505397267250149	-0,0124910235422748	-0,00277307775436864	-2.23579e+09	0,000458016313544649	0,0013322742025801	0,000167616190617745	0,000648942932998081	0,00237379789241123	-0,00133810576698558	0,0013908402190595	0,00164552760713041	0,00160696030626682	-0,000373093162535746	0,000996952302001423	0,000454061953278464	-0,0026313239990055	0,00122588571362174
	Gcou-1-re.couchi	couchi	1	0,00783467393907239	0,030939477593155	-0,0124762302397898	0,0351698108716118	-0,00244258841523951	0,0210569677968712	0,00693252156645024	0,000969240462981207	0,00135419414723902	-0,0026212611988534	-0,00160903940660057	-0,000496681813922541	-0,00069830236926497	0,0017530443293872	-0,00127703379484287	0,00206383430513849	-0,00132599774117855	0,000351819173368137	-0,000477755316110015	-0,000264266501281529	0,000560164288341477	-5.48148e+09	0,000557106209461945	0	0,00222605494255501	-0,036176466389242	-0,0163331618816453	-0,0150072798085402	-0,0184623111076708	0,00211980406478986	-0,00238820395277956	0,00137151948092541	0,00220067139851513	-0,000551978166970437	-0,00213237540241657	-0,00228564823136625	-0,00150260261802428	-0,00210109183234432	-0,000516835099014581	0,000657624290071816	-0,00135334219194178	0,00158613198408355	-0,000661327894426697	0,000910578053465022	0,000134690008629575	-1.47655e+09
	Gcou-2-re.couchi	couchi	1	-0,00929996488061733	0,0468480854794701	-0,000792134351580327	0,0432474889156894	0,000171524720093866	0,0192239394024655	0,00826537861029653	0,00218093649279602	0,00295388658729191	3.92332e+09	-0,00183694697021634	0,00164931193071485	-0,000594616119651623	0,00111929173109622	0,00123055401207082	-0,00105325421081203	0,00238484928020964	-0,000948049903995042	0,000876293662579131	0,000266101584933117	-0,00109143525710049	-0,000844093070933942	0,000121387159295197	0	0,00496865257483536	-0,0165358185559948	-0,0227139228315016	-0,00602612507674394	-0,0190561933097982	0,00961324206293409	0,000120831078631189	0,00103825157544572	0,00339698209375957	0,00199443372510627	-0,00158562739267418	0,00193402531046681	-0,0041145296510873	0,00183492367645308	-0,00187424945073014	5.26868e+09	0,000159437285821597	0,00110947280876284	0,000456366820568002	0,000306992890718807	-0,000171305296871082	-2.48415e+08
	Gcou-3-re.couchi	couchi	1	0,0203847993481821	0,0229981020626909	-0,0283053399875593	0,0346462797595857	-0,0223257327471245	0,0180635672225025	2.9896e+09	0,000376649007097512	0,00268363051877528	0,00100301413902175	0,00069100333140883	-0,000414354084290099	-0,000402279626420288	-0,00179161110171939	-0,00374431001447954	-0,000504146560400351	-0,00356179253451461	-0,00047658545612185	-0,00165284681072361	-5.27052e+08	-0,00197570558826048	0,000437399244349213	-0,00149612768863234	0	0,0145494327362578	-0,050634638865375	-0,000925818136129057	-0,0324876330156965	-0,010798490526057	-0,0120639300238096	-0,00327976914658179	-0,00646481862422767	-0,000714566363621947	-0,00105627854601976	-0,00204798727943148	-0,00197352095585408	0,00245112063618922	-0,00382859436854827	0,00270496550009809	-0,000835426374837055	0,000278090246454767	0,000833387200161373	0,000311859180314058	0,000390596294985088	0,000110943997877445	0,000463973954334933
	Gcou-4-re.couchi	couchi	1	0,00252231045989291	0,0367492634472185	-0,0243686431258067	0,0280733784825858	-0,0214551556287504	0,0218772521323415	-0,00287489466136359	0,00455728942718215	-0,00233279835117117	0,000810449687572091	-0,00177982780107741	0,00118482103838898	-0,000138893155844651	0,000507254261015007	-0,000864615546124208	0,00111003761385803	-0,00215086210486689	0,000409210313645179	-0,00122383859290185	-0,000205175002319692	0,000136801188559737	-0,000448598884369906	0,000333650833071409	0	-0,0122416542412221	-0,0504642668835551	-0,00143047346596834	-0,0321039366933233	-0,0163659046383167	-0,00858349403149397	-0,0132417810323651	-6.26443e+09	-0,0087543678017922	-0,00163642279132841	-0,0024790045672435	-0,0032161502071211	0,00253100970677757	-0,00112949860172306	0,00273200441464681	-0,000991463462348649	-0,000132183666279413	9.45719e+09	-0,00279196754296986	0,000929882966121741	-0,00124912053110772	-0,0007665756522986
	Gcou Croatia 2013 1l gedreht.couchi	couchi	1	0,0274114492030548	0,0346388927630265	-0,0106565152462546	0,0323845169796605	-0,00359132783043848	0,0219528610262613	0,00325614337039653	0,0101072936227136	-0,0012800465839886	0,00250625784166833	-0,00332191830795845	0,00103409382459372	-0,000579571734293799	0,00114720648641823	0,000928996252171173	0,000794120774952041	0,000363002616304003	0,000679142520052452	-0,000319450660631698	0,000299949985588181	-0,000106913622027081	8.6135e+09	0,000361386099530321	0	0,0330387456998946	-0,0528038779152963	0,0048158648511005	-0,0278330699349302	-0,00816131342208152	-0,00363134051616539	-0,00203351798371849	0,00550361261781847	-0,00182761760928828	0,00255411892394287	-0,00119298108710229	-0,00232752772070869	-0,000320192028932925	-0,00362793823806178	0,00022670172296	-0,00282236214877761	0,00165431715398429	-0,00104747736549037	0,00140264324007216	-0,000169832281043528	0,000346207081272721	3.68696e+09
	Gcou Croatia 2013 2l gedreht.couchi	couchi	1	-0,00822998140528412	0,0450619108267242	-0,00291117160658896	0,0367762960550873	0,00717044446996337	0,018883877935055	0,00574171477100273	0,00777115280569144	0,00286691852265034	0,00163194192527426	0,00080919963272786	-0,00106557667095099	0,00155163644573996	-0,000582296841481537	0,00222620193234968	-0,00125062332919187	0,00234010766266818	-4.60028e+09	0,000241530002909692	0,000659399438810581	0,000120785368898182	-0,000530338292237557	0,000218523261952188	0	-0,00404787603596831	-0,0145728876315091	-0,0270107204103396	-0,000342037786073772	-0,0238844585546775	0,01034742079735	0,000464303499243783	0,00274005424775406	0,0047588473399331	0,000599742089064393	0,00158427680806615	-0,000594613906585237	-0,00236834575530633	0,00107075665980678	-0,00311669984307081	0,000317615329922318	-0,00111150183356338	-0,000610023715634472	0,00059826575004624	6.78179e+09	0,000611271473135038	3.51775e+09
	Gcou Croatia 2013 3l gedreht.couchi	couchi	1	0,0122568653118586	0,0453921711355083	-0,0131135574390418	0,0434390418990186	-0,00641198961139154	0,0184581576202168	0,00608092150863607	0,00469594359742415	0,0048914669235271	0,00242400729441296	0,00177584530203224	0,00392016899003844	-0,000819789479128549	0,00281394140023611	0,000546970220649595	0,000655635440247616	0,00139829107954528	-0,00021102865678405	0,000790396226471817	-0,000493327935714616	0,00123415076349572	0,000868556173115207	3.31465e+09	0	0,0278169092986287	-0,0356399162016477	-0,003511190185976	-0,0133870593177295	-0,0139342551248986	0,00504682258769513	0,000778965091331038	-0,000564195908267528	0,00232714594756755	-0,00121368764235765	0,00293663648823765	-0,00195872364101936	0,000949556168045981	-0,000516135450495527	-0,00199106814368639	-0,000865176790732538	-0,000145509054921432	-0,000654337270734229	-0,000879569477517402	0,000315177672641691	-0,000743154278638439	0,00033535717066083
	Gcou Croatia 2013 4l gedreht.couchi	couchi	1	0,00429353798518048	0,039167927710716	-0,0184892141213497	0,0402418729470335	-0,0105458542896092	0,024580890581485	0,00276598179156331	0,00698300018419366	0,00210552683912029	0,00258396696680524	-0,00204491424389033	0,00230167464592012	-0,00415721876568143	0,00219788915311549	-0,00370619747417364	0,00151603209092828	-0,00164166384556292	-7.79942e+08	0,000384158311647194	0,00103569837876469	0,000701753734019527	0,000897018688717868	0,00042447721607271	0	0,000664611726893236	-0,0325444551600254	-0,0154273336517612	-0,0170378789456772	-0,0177619664935028	5.62813e+09	-0,00622906443680402	0,00289083072878	-0,00162558045181771	0,00133474149333443	-5.43717e+09	0,000660946544964343	0,00125071347512921	-0,000229212139687332	0,000370919564490608	0,000302121629762241	-0,00209772201478361	0,000983555680697101	-0,00145989545834929	-0,000238782540311795	-1.53115e+09	0,000401551086062729
	Gcru-1 B2-re.cruentatus	cruentatus	1	0,0219115231216354	0,0347307598871952	0,000774856409792459	0,0218557943672194	-0,00839183342132678	0,0108315096772789	0,000444069341115572	0,00413900011918593	0,00319179331003276	0,00246373826303815	-0,00215188388200402	-0,000111431380905608	-0,000494993860301845	-0,00117875931006456	0,000449196644136169	-0,00134599284599405	0,000936666413121709	-0,000543439146032906	0,000742450831327498	-0,00159786480856291	-0,00113135581198979	-0,00102284389146627	0,000371611137039896	0	0,0116998238623847	-0,0651495402455631	0,0109654371994057	-0,0417688754031077	-0,00393980767630753	-0,0168049533936335	-0,0128981258220675	-0,00802283627006483	-0,00124221501645037	-0,00318581946854598	0,00144546749866142	0,00107620646018523	-0,00112257588474595	0,00165888179011277	-0,00126923685506219	-0,00097451913583239	0,000285492944396113	-0,00230454086695676	0,0016993890229218	-0,00153989489002758	0,00120161877330742	-0,00219717545095538
	Gcru-1 M2-re.cruentatus	cruentatus	1	0,0382176557919342	0,0391858752967567	-0,0102509560236137	0,01523689883996	-0,00727417053349207	0,00438156935058672	0,00674518030439325	0,000716071077285454	0,00180624243280259	0,00651139085534138	-0,0039208820216721	0,00407857553698635	-0,000318482280181258	-0,00176813928730311	0,00304433669096938	-0,00433443185045771	0,00325752765398866	-0,00251350758425317	-0,000183843098942556	2.77791e+09	-0,000150891009599833	-7.62549e+08	0,000288090004428392	0	0,0433988108200898	-0,0512230386455067	0,0104775397088006	-0,0331237183344955	-0,00709403716807902	-0,0167887218275051	-0,00714738622971549	-0,0113612365697341	-0,0024375873259328	-0,00394142656432472	-0,00212681071604108	0,000721713259578588	-0,000952057736155241	0,00164480339294841	-0,00148712328312676	0,0025812273748274	-0,000239807034080132	-0,000597190257062952	0,000113181831500259	3.45447e+08	-0,00176211223078842	0,000756883179464859
	Gcru-2-re M2.cruentatus	cruentatus	1	0,00314224216332108	0,0476815067334775	0,00178710043323115	0,0270922747191951	0,000364405105721653	0,0164295827576349	0,00490446015490749	0,00508430208627221	0,00132189900564574	0,00236719867701327	0,00339171510849347	-0,000321637283093385	0,00258640847980202	-0,0010091015474545	-0,000291276011633448	-0,000864073466100738	0,000748149958828018	-0,00106117586473158	0,00110126017979533	2.30616e+09	-7.90803e+09	-0,000418925154221334	0,000453129140624857	0	0,0340828483856555	-0,0501692182020059	0,00516399498622388	-0,0401504119049128	-0,00395959516672723	-0,0133250270751752	-0,00259647814243818	-0,00557232354863236	-0,000744567972081307	-0,00141683156250228	7.26724e+09	0,000948382757444845	0,00142973620821796	-0,000210304576348012	-0,000340685248967261	-0,00171988095495793	-0,00136817296562003	-0,00235745293908025	0,000431403017284633	-0,00203235965068632	0,000164996338622365	-0,00166710440507978
	Gcru-2 B2-re.cruentatus	cruentatus	1	-0,00126636513179126	0,0321171843277862	-0,0246062116175853	0,0174171674755552	-0,017655939336013	0,00724329682103657	-0,00473757088994929	-0,000335344912129027	-0,00406254760898585	-0,00105964200980633	0,000161925130534735	-0,00194583867344466	-0,000961559476321663	-0,00204847226175003	-0,00280020233200881	-0,000509108954176791	-0,001920258279987	0,000757427443878016	-0,00122704821168305	0,00203362409977578	-0,000547231723847762	-0,000501939840829125	-0,000409429599787256	0	0,00350687959480203	-0,0564701562454827	-0,00509544105757851	-0,0416380954619943	-0,0128635217573232	-0,0183056211678965	-0,0106184660002543	-0,0084827784436288	-0,00651593701944565	-0,00338151884093805	-0,000496866026236797	1.65192e+09	0,00467462795374961	-0,000228463262774144	0,00327678477513093	-0,00228420511255476	0,00216358929248041	-0,0022909332452536	0,00230606563831194	-0,000543054439123592	0,000825696447769178	0,00174694244005143
	Gcru-3-re.cruentatus	cruentatus	1	0,00924030806917789	0,0513130589228032	-0,0153155892487449	0,0176512545665394	-0,00527092075011334	0,00935673483047939	0,000729266788687546	0,00633602742159402	0,00234428204604936	-0,000509442692299156	0,00286947031539498	-0,00104534514930772	-0,000138590708189987	-0,00210196968269642	-0,000179844987266361	-0,000928411410573922	0,000354443880037413	0,00111323303581442	0,00016520909055481	0,000621740733434948	0,00102059039217827	4.55421e+09	0,00113333764366514	0	0,027789322109795	-0,0476250016988297	0,00449858086497666	-0,033580489701344	-0,00972434027457666	-0,0160445690057344	-0,00532282732545334	-0,00602361358528796	-0,00351596534450716	0,00134807643895197	-0,000373661454517887	0,000354249442242655	0,00087576955063451	0,000337659723795722	0,00100079844057343	-0,000467200215730698	0,00303762648584628	-0,0015879083035195	0,00148852838388979	0,0011922857657743	-0,000539596729602939	0,000603264626548004
	Gcru-5-re.cruentatus	cruentatus	1	0,0233071116719128	0,0268747335145515	-0,0165079037137214	0,0078034248585409	-0,0138778814255156	0,00159754586594346	0,000877462637002336	-0,000653840771368293	-0,00150447339106711	0,00321737872038627	-0,00459979369341433	-0,000624984174415997	-0,000793813224498242	-0,00171984628272553	0,00118015015821268	-0,000154840713695575	0,00160682999530457	-9.65094e+09	0,000788687942266796	-0,000722680464039121	0,000541708490510176	-0,00146200373121898	0,000739136146419539	0	0,0132817486702976	-0,0601373081934577	0,0109264577312038	-0,0448486643970416	-0,0105935451853913	-0,0174073638141762	-0,0120893643959804	-0,00581871207929095	-0,00272496726190088	-2.14592e+09	-0,000980500950107958	0,00407558678813312	-0,00229067978144736	0,000861222920074752	0,00180148518854103	-0,0026792289444706	0,00230830416772065	-0,000956257877782825	0,00188301732300419	-0,000540239289586158	0,00156795003169663	-0,00133051732997919
	Gcru-6-re.cruentatus	cruentatus	1	0,0149760432887824	0,0557861014756676	-0,0158400018262749	0,027681349164836	0,00686691041986484	0,00699129454942563	0,0125300333916876	0,00615973815075172	0,000142216096626818	0,00336903760851218	0,00204285783621494	-0,00357032608901376	-0,000862836750724624	0,000306701803330706	-0,00362906579349946	-0,000928084014312904	1.49835e+09	-0,000786467437802861	-0,0012407517600379	0,00196219218658519	-0,00240009552632122	-3.49254e+08	-0,000184188050782956	0	0,0135515301165911	-0,0300344341810029	0,00241258259904072	-0,0297260986566615	-0,00486978983634074	-0,00752167684237308	-0,013420086866653	-0,00342754187880103	-0,00782863531628836	-0,00418935507854102	-0,00413946798038472	0,000498814846118717	-0,00291054324657055	0,00152650580455554	-0,00113287750793447	-0,00162274417939816	5.50094e+09	-5.73385e+09	-0,0013583540681906	-0,000385091294704859	-0,000928770208240447	0,000880359485321029
	Gcru-7-re.cruentatus	cruentatus	1	0,0164666557255251	0,0446992102868972	-0,0170988852404136	0,0118653794616093	-0,0077523639535596	0,007499113056307	-0,000886835509084694	0,00639067524394499	-0,000101543442622654	0,000358311889400096	0,00120189417753483	-0,00501503147058287	0,00279202930932232	-0,00302116518675172	-0,00108991247198037	0,00213624873773802	-0,000326203825225031	0,0030814728398258	-0,00076580953639055	0,00223645584578283	-0,000272326349984663	-0,000474260857854232	-0,000284664010638528	0	0,0355390002455687	-0,0420906657273275	0,000409859728194712	-0,0218612846328916	-0,017181428391603	-0,0131722177750617	-0,00863372451250487	-0,00919729487059518	-0,00263285788383743	-0,000747922222749628	-0,00215078319662296	0,00278811736057488	-0,0011550831082541	-0,000761107866652052	-0,000351940634247093	0,000610092150139084	-0,000437635664138231	-0,000279047581297348	0,00170750423528158	0,00104025707766086	-4.87872e+09	0,000874078817233914
	Gcru-8-re.cruentatus	cruentatus	1	0,0386174770004548	0,0127388932192397	-0,00165899805073687	-0,000752661984331819	-0,00181714223544066	0,00155960237222171	0,00172225563981536	0,00547475286559693	-0,00489547139176536	0,00557694835132498	-0,00333760588473232	-0,00200137296957061	0,00180976711444333	-0,00259096132927148	0,000505174895163187	0,000544839790851385	-0,000518558408351966	0,000480863486753104	-0,000526820649977395	-0,00031477427090203	-0,000363647701052159	-0,00072784864557275	0,0011313721045163	0	0,0352551157272645	-0,0539570605283344	0,0188165475707797	-0,0372536741369605	-0,00720268439225187	-0,0203270856861109	-0,00952627415423654	-0,0124773148159915	-0,00450484320864242	-0,00215936796598886	-0,0044337373790949	0,00405011841187396	-0,00277606307978499	0,000136093440603325	-0,00115644474353226	-0,000748391190184127	-0,00325748602637287	6.0355e+09	-0,00260447667769246	-0,00068504820080266	-0,000861596794717144	0,000282632286187383
	Gcru-9-re.cruentatus	cruentatus	1	0,0314829180043138	0,0153359009279854	-0,00855586464853292	-0,00783725503001261	-0,00513314413311431	-0,0109642676057151	-0,00199190821549157	-0,00454182506159625	-0,00801534425855142	0,0024836457997738	-0,00800067480084764	0,000309244456022013	-0,000744862486502766	-0,00210031751577312	0,00123441053777559	-0,000807668421054564	-0,000174896711862127	0,000280917534033979	0,000523806788615296	-0,000404183135499162	0,00108661286805675	0,000113388882989984	0,000477921717696214	0	0,0148022826040902	-0,0471708696048393	0,00900523549876338	-0,031648590277558	-0,000809839522034002	-0,0147994969780471	-0,00147454199289832	-0,00727173267799322	0,0016059115112244	-0,00333052490826897	-0,000108772655772982	0,0020287273057761	-0,00335393549186286	0,00195496629846375	0,000331220366999487	0,000250996935951673	0,000326153652799723	0,001994852913943	-0,000363845670180774	0,00147658570498938	0,000833216123937985	0,00093861078897317
	Gcru Krk-1 re B2.cruentatus	cruentatus	1	0,0207233317068543	0,0319284167084383	0,000951065747295122	0,0208045863738485	-0,00919230039890201	0,0088879848122712	-0,00161728754402161	0,00222247707095608	0,00248607643988903	0,00235972837273945	-0,00161910196941282	0,000328089754231466	-0,000649053117620865	-0,00155507674744233	-0,000200752539535909	-0,00186062232697582	0,000980648695576443	-0,00064075352505928	0,00121336944519198	-0,00192867549849217	-0,00116819289669846	-0,00183645902481471	9.58077e+09	0	0,00908423441978537	-0,0686509027444386	0,0102489013902864	-0,0428415928163868	-0,00338323788305172	-0,0169353454917618	-0,0132773621982351	-0,00917585797220056	-0,00248593771349779	-0,00433392852023133	0,00112102603339439	0,00131450546977193	-0,000599098505300634	0,0022361952200779	-0,00125192810556495	-0,00108444889275688	-9.42783e+09	-0,00209373301976752	0,00197852882054868	-0,000691706038650702	0,00176575821131191	-0,00187131124960947
	Gcru Krk 2-li M2.cruentatus	cruentatus	1	0,0029059331099176	0,0351400373375978	-0,0133185448059841	0,0253004381793492	-0,00647761813824225	0,0117267211313548	0,00545478418428493	0,00346302002108372	0,000232706419335034	0,00337695397445641	0,00244248425087598	0,00100754708650583	0,00250068480394086	0,00160907703424077	-0,00182417980972212	0,0017795117551504	-0,0010055126260381	-0,000492186994359455	-0,000740576351899221	-0,000882769580571056	-0,00246232442402061	0,000610377521407681	-0,00013948143701867	0	0,0155915927039286	-0,0563804174197701	-0,00686372062286234	-0,0435060018440382	-0,0164964610775161	-0,0132754891021752	-0,0108198416785325	-0,0026070478062467	-0,00517262346534703	-0,00245515843657458	-0,00327904466500545	-0,00169996176192474	-0,00104545917819182	-0,000684635805125474	0,00228720503542147	-0,0013098626873239	0,00358679107656347	-0,00289185363759124	0,00101987090278639	-0,00173602535426055	-5.95118e+09	-0,000578739755098634
	Gcru Krk 2-re M2.cruentatus	cruentatus	1	0,0024278098453319	0,0481679187436785	0,000944472901527882	0,0270105593474972	0,000118931235820517	0,0164645959174588	0,00445195242011701	0,00517849882034014	0,00134016186421717	0,00221021706142141	0,00339452067516395	-0,000305891174351464	0,00255785963869121	-0,00103503408149104	-0,000232874749957026	-0,000828615407072428	0,000461264752829619	-0,000999529579225137	0,00102580224803182	-0,000100821145052485	-0,000253692378788009	-0,000436182869449696	0,00037726831791384	0	0,0329296718845055	-0,0496580107618478	0,00437169489105564	-0,040748750074667	-0,0045249232973835	-0,0133766116627875	-0,00299192015230956	-0,00598115270801337	-0,000651145096909821	-0,00162176797544007	-0,000133264164428354	0,000968073525646523	0,00155052596359859	-0,0002099098987617	-0,000420672126366187	-0,00160299684857195	-0,00125718492734345	-0,00242750740265322	0,000588033822850358	-0,00211518536045481	0,000120076668761004	-0,00178353155605054
	Gcru Selce 2016 1-l gedreht.cruentatus	cruentatus	1	0,0409363038890359	0,0434937194372844	0,00232687594430356	0,0187324534520618	-0,000783511900188588	0,0131249761383814	0,00498325789748599	0,00467155115067699	0,00318109631614784	0,00131891323413591	0,00237622650787785	-0,00112245105964152	0,00218250451258093	-0,000810593788045207	0,000597035990578697	-0,00160889962426341	0,00222716406446315	-0,0014020369048398	0,00120809404239666	0,000499133244041448	0,000118153387303613	0,000294390334821487	-0,000527124844814441	0	0,0472287765225205	-0,0586302532172955	0,0140243723942248	-0,0376951025227634	-0,00414119134097049	-0,0109689886948517	-0,00646923061239858	-0,00358444543395565	-0,00296317410956553	-0,00183476062610699	-0,00245187107030562	-0,000890007114452315	0,000512055009927171	-0,000673419396173859	0,000445351977565629	0,0012115640775908	-0,000658443104849332	-0,000877488967503543	-0,000776907912576112	-4.2308e+09	-0,000893068310426291	0,000640973733067161
	Gcru Selce 2016 2l gedreht.cruentatus	cruentatus	1	0,00848371964295528	0,0314473894728171	-0,0243007183818986	0,0212628460546629	-0,0115844228042815	0,0111488650260683	-0,000791679536997633	0,0018926932639699	-0,000637358549739984	-0,00164054134415949	0,000189663719956893	-0,00434512243900559	-0,000985153114166164	-0,00231930476742995	-0,00171783596637179	0,000407481945086713	-0,000563186863247962	0,00146458307435355	0,000464663679006776	0,000591138004989537	-0,00113228472463755	-0,00149326950207419	-0,000545575750284281	0	0,00737190849321978	-0,063269248254877	-0,00709818101270253	-0,0457769618179224	-0,0120754050213569	-0,0206585215109213	-0,00681668315156648	-0,00755535571872732	-0,00409636648866071	-0,00131814863700153	0,000131209787427757	-0,00103801651354089	0,00422638355666727	-0,00187482463641429	0,00347320193701712	-0,00260992232770075	0,00134047551569787	-0,000869799543316761	0,00186096699812148	-7.30714e+09	0,00131903902330289	-0,000123982178394723
	Gcru Selce 2016 3l gedreht.cruentatus	cruentatus	1	0,0219343009277426	0,0514492726042138	-0,0179309926845621	0,0224406398568404	-0,0114167518142059	0,00705892970258957	0,000969408795265992	0,00252230094890001	-0,000736215907176808	0,00320107555411598	0,00134618524134309	-0,00203530911754133	0,00126980864460079	-0,00177285891255722	-0,00100667844552393	-0,000163529110620159	-0,000456436833959101	0,000399376876911024	-0,000157988486096254	0,000887723171403283	-0,00109972370698241	0,000699550734860014	-0,000878684875351566	0	0,0185266034578586	-0,0409485799149272	0,00460486589922512	-0,0318301831044752	-0,00687918619874435	-0,0140808779394504	-0,0101591109930059	-0,00653898412110123	-0,00504704653729016	-0,000717638564952432	-0,000867589002325236	0,000862065676481101	0,00252374489478401	0,00101048030506484	0,000652383252058064	0,000930809996704424	0,00064531235449532	-0,00103834408210378	0,0023464110531166	-0,0010489731162847	0,00106957113073929	0,000150691772695125
	Gcru Selce 2016 5l gedreht.cruentatus	cruentatus	1	0,0316910944744759	0,0350174488855295	-0,0159938786532659	0,0163592163430878	-0,0121438168860972	0,00521628062818223	0,000322943532027004	0,00456774045055035	-0,00219258991472842	0,0046986058106075	-0,0016711490390746	-0,00235648441105561	0,00113526187669548	-0,00184507587031781	-0,00162056668112237	0,000144821481271492	0,000321284806634518	-0,00197907949732701	0,000808165508775638	-0,000718811904934051	-0,000222289765743898	0,000688135733953231	0,000706895363743857	0	0,0279859107739232	-0,0582306575749924	0,0114447562659662	-0,0422078499864635	-0,0109079893016871	-0,0138832151720088	-0,0117110746536879	-0,00523818646737886	-0,0052363049899354	0,000126582373881419	-0,00230241939237037	0,00145256040068275	-0,000337655910455603	-0,000554570309966875	0,00471458902010683	-0,00131084036612825	0,00349208552479557	5.61742e+09	0,00211537114434956	-0,00123432624574818	0,00254581794606969	-0,000351383830050639
	Gcru Selce 2016 6l gedreht.cruentatus	cruentatus	1	0,0136374559982046	0,0292659185360662	-0,0160109419728633	0,00298346178198494	-0,00466729241462588	-0,00666198111592832	0,00288541519873798	-0,00177218251522234	-0,00185593277781546	0,00448225581471376	-0,00196145402643676	0,00182053435066342	0,000202363513819076	0,00130460476517351	-0,000579721834902177	0,00108495458466767	0,00107602133507967	-0,00162160504692323	0,00293665619408283	-0,00175776661981092	0,00174668808144707	-0,000996609825659126	0,000556761852157662	0	0,0155393875256191	-0,043564651009055	0,00623117904056272	-0,0376558089867362	-0,00509377615433475	-0,0171855866721985	-0,0103879347781589	-0,00837344361339517	-0,00293778967990163	-0,00435477265990941	-0,000976823468438717	0,0033460103295598	-0,000662733269752316	0,00219013885211098	0,000620994089733598	6.27334e+09	-0,00152638603365633	0,00190682531178817	-0,000333565714979934	0,000356193954451596	0,00153971833528764	-0,00112009663830806
	Gcru Selce 2016 7l gedreht.cruentatus	cruentatus	1	0,0233240822018493	0,03938089031924	-0,019298484105558	0,014374453601604	-0,0121168445849974	0,00477593810041242	0,00119303003596329	0,00218563507789452	0,00289899479525276	0,00204435218061401	0,00187226573873974	-0,0027272352887338	0,000417087668472359	-0,00115889968180035	-0,00250846728906371	2.61837e+08	-0,000268760634988731	0,00041754921133105	-0,00140375056659826	0,00204295038028791	-0,00209416423503741	0,000911010238038893	-0,00135695898584595	0	0,0273707462315285	-0,0475344685005309	0,00344484003723923	-0,0287402888989414	-0,0118937788773893	-0,0168074524641849	-0,00794380899602553	-0,00907785829828357	-0,00562850097377015	0,00183976853597297	-0,00487961782508212	0,00225545486827923	0,00125215758957773	-0,00295254242837831	0,000989511690263072	-0,00082373484923416	-0,00129126535579648	-0,000209861332981402	4.5256e+09	0,000401013801007343	0,000279236658065672	0,000587169959420179
	Gcru Selce 2016 8l gedreht.cruentatus	cruentatus	1	0,0486444351290486	-0,00997293698422314	0,000630626567836185	-0,019183437513918	-0,0177664966709224	-0,0143327772546085	-0,0139554252725814	-0,00574626161827064	-0,00905256291045235	-0,000847155928423278	-0,00281768106631293	-0,00164543587969077	0,00245161744040643	-0,000626148694227096	0,00213933005662725	0,00323297695775198	-0,00322748777179344	0,00426199545294178	-0,00411238556921793	0,00164597812036519	-0,000677050102791723	0,00179045278067027	-6.72275e+09	0	0,0273739013979	-0,0528938147862842	0,0219407908443802	-0,0356174102504465	0,0031177432713917	-0,0142460531340315	-0,00101902422090111	-0,00589509326895969	0,00208068658068492	-0,00307698971926415	-0,000540341600260353	0,00166806831361713	-0,000455494680060864	0,00250061516511209	0,00166590709581611	-0,000603440418887008	0,00119347257289804	0,00026017625879071	-0,00138277963315612	8.29175e+09	-0,00173444018313026	-0,00149886268040004
	Gcru Selce 2016 9l gedreht.cruentatus	cruentatus	1	0,0477199949142836	-0,00509328566700984	-0,00648870892025377	-0,0159238213969415	-0,0117837357122393	-0,0169849650053356	-0,00262367772577294	-0,00984460905490737	-0,00603222615199055	0,00181566490565294	-0,00694716369336618	0,00180143612998761	-0,00156533772913026	-0,000871417067278095	-0,000215171630871138	0,00100694701981037	-0,00256789123357161	0,00216666020372966	-0,00197890688021902	-0,000416062588817793	0,000439398182993974	-0,00118194875940997	-0,000605044229266748	0	0,02019329551131	-0,0517759383790639	0,015450594546857	-0,0279306943622404	-0,00835653435328861	-0,00595142134408409	-0,0068976375572138	-0,00854862607612951	0,00515017856098962	-0,00776004364535199	0,00310894337472842	-0,000337107910361116	-0,0025783696454137	0,000516947282008691	0,000913741857750692	-0,00167622063868321	0,000650962649974629	0,00182707770895605	-0,00185141464765477	0,00191967894065885	1.6616e+09	-0,00117334887293587
	Gfal 1l_160118.fallax	fallax	1	0,021682518000193	0,0525448017006332	-0,0111929652594538	0,0384173996289501	-0,00226396260482397	0,0191009492434578	0,00204491907002264	0,00169827343061705	0,00262101545903078	0,00130104919713018	-0,0015410613762108	0,00110494679656975	-0,00141856192713449	0,000132384865053351	0,000957676785795306	0,00102436238623215	0,00266646834213306	0,000927682627832657	0,00140443373693138	0,000244240843657698	-0,000129938847867937	0,000455081610497402	-0,00126368432687638	0	0,00969095126866276	-0,0241183805550251	-0,0102456484619249	-0,00916732573219999	-0,00531050999395452	0,00968333509635257	-0,00194603918512343	0,00906996599841093	0,00193158192205814	0,00072663533922497	0,00423599871186289	0,000182756260082066	0,0023552655405717	0,00316694876765591	-0,00155064822500355	0,00283237670314986	-0,000768638399161721	0,00154539138068844	0,000932746581540598	0,000684726882182596	-0,00032191514823706	0,000154294083286965
	Gfal 4L.fallax	fallax	1	0,0244172892497405	0,047253523181204	-0,0033520352978906	0,0271483765621608	-0,00576670918511425	0,0192536828007343	0,000300080668635504	0,00867505669736918	0,00185715308762927	0,00214312354742901	0,0025136089277926	-0,000546642822891718	0,00153868273641734	0,000574667831977774	-0,00140024688126966	0,00145178605041965	-0,00128890685459606	-0,00018640969048054	0,000433924459951052	-0,000622143270506102	0,000620031998734372	0,000144630817404826	0,000884249346928497	0	0,0175489454094825	-0,0466980498602991	0,0101596436904021	-0,0367183944144804	-0,00281895316265061	-0,0107929825034162	-0,00594004725689754	-0,00028031679593404	-0,00353813327134427	0,000317854539781151	-0,000808001004204999	-0,00175979401192062	0,00141992249674126	-0,00232433940311569	0,000328510192670276	-0,000653726285694542	-0,00107495813135498	-0,000297333930546606	-0,0010419381892829	-0,00024101852775256	-0,000603880726004565	9.92008e+09
	Gfal 4r_160118.fallax	fallax	1	0,029613149124583	0,0460785992089834	0,00716443236091189	0,023408961386243	-0,000372130470086184	0,0211485335780006	-0,000980655396832575	0,00904251645271495	0,00134825857486379	0,00214120682362831	0,00168222353857545	-0,00136019976185848	0,00134131205916981	-0,00191729428369832	-0,000709186598276584	-0,000606148961073007	-6.59231e+09	-0,000638108737266259	-0,00013635635905712	0,00084999787881933	-6.33998e+09	0,000488421443673285	2.85337e+09	0	0,0189463808016897	-0,0473886545740558	0,0129714397741209	-0,0379086879052661	0,00427258294116966	-0,014522032895426	-0,00270666373741035	0,000636147139831218	-0,00388076851612861	0,00224027097077436	-0,00144093782454324	0,000977724091386822	0,00104787871315424	-0,000783868019533308	0,000933266674556726	-0,000780136548059712	-0,000427088459552342	-0,00121692615581795	0,000575524863313463	-0,000590866373724817	-0,000125572904265256	0,000609210235172205
	Gfal_1R.fallax	fallax	1	0,01575232234505	0,0579014030494617	-0,0120984156588954	0,0414290631388318	-0,00409561190679994	0,0195488888035705	0,00425405319717796	0,00178643176563111	0,00374496628493221	-0,00134123983496494	0,00119902940836286	0,00162049357375957	-0,0021492828233261	0,00136096728412093	-0,00054625428171512	-0,000735971207306962	0,000141623110263628	0,000663530038449186	-6.32957e+09	-7.91895e+09	0,000765876053956557	-0,000199577666041964	-0,000211613282447477	0	0,013533956050605	-0,0430386026008919	-0,00220741341140298	-0,0314045759538106	-0,00862188542941016	-0,00856017454404584	-0,00561593416398396	-0,00231419178310412	-0,00310771273478874	-0,00310198330788546	-0,00273362670731357	-0,00345185177116145	-8.38385e+09	-0,00279598801854746	-0,000332031478631826	-0,000834730712849391	-0,00213763092470805	0,000153710493353542	-0,000524539266028394	-0,000378583679616589	0,00181883618252991	-0,000349593479058945
	Ggas-3-re.gasteveni	gasteveni	1	0,0132700815911513	0,0422436267143879	-0,00120236543986397	0,0275710409741754	-0,000224061480553456	0,017842761563806	0,00816550795841916	0,00142645955580283	0,0067983032096658	-0,00218228047453302	0,00145200086361545	-0,000998546523798276	0,00055045263183528	0,000724462143877621	0,000795807364897933	0,00241024283746776	-7.67194e+09	0,00280005487640486	4.53054e+09	0,000658062480662668	0,000700165421896905	-0,000347263633977029	0,00110240136567842	0	0,0120292965284904	-0,0360181705516902	0,00249686141730467	-0,0225395431661982	-0,0134458058630749	-0,00552770921013345	-0,0079717227877332	-0,0014600729224747	-0,000574324432977287	-0,00207001313315861	-0,000992029137303071	-8.00792e+09	-0,00237831379832603	0,000983237183104677	-0,000309690370607582	0,00166948652938319	-8.16811e+09	0,00192222925984452	-0,000605510042279812	0,00116854436319092	-8.70873e+08	0,000117611721496398
	Ggas 3l gedreht.gasteveni	gasteveni	1	0,0120626527847066	0,0472694595688653	-0,00606700943983469	0,0327626661363566	-0,00243272915735052	0,0189352899366718	0,00690568689669975	0,00285952128013963	0,00508005850519232	0,000129111881332597	0,00150662357572361	0,000619001746047457	0,00173930071723641	0,00184506726456059	0,00118931409072586	0,00215247077723362	-0,000625589763147889	0,000319587408026426	-0,00126634665196289	-0,000292045488895801	-0,00058569229903871	0,000326049405864029	0,00043164299409038	0	0,0155319709958495	-0,0343297282383408	0,00152321835574737	-0,0201627332559226	-0,0121850986093237	-0,00426334464625737	-0,0073326141196894	-0,0025639994006008	-0,00108809949012501	-0,00280404935483541	-0,00303322635001782	-0,00141290305132805	-0,00222263243501932	-0,000187378136557384	0,000748219813638355	0,00117622696744685	0,000585095980581683	0,00187331955564417	-0,000772038858677711	0,00117261639919362	-0,000643834141682828	0,000944348500709874
	Ggen-1-re.geniporus	geniporus	1	0,0052023826198316	0,037618960363462	-0,024996106469737	0,0112490189359344	-0,0226282558461554	0,0038688862767103	-0,00581079110047475	-0,0020730484412394	4.66896e+09	-0,00346842882659454	-8.10766e+09	-0,000990596728764346	-0,0023394156975201	0,00103837708746064	-0,00282519150493856	0,00068102066299373	-0,000807889226229957	0,000191294144873934	-9.05437e+09	0,000850306707729168	-0,000265694539387552	0,0010459699704561	-0,000600455801409877	0	0,0149428393926293	-0,0301957047401114	-3.84088e+09	-0,0168688790828503	-0,0169810491548656	-0,00678323153619295	-0,0137984090601591	-0,00516037054433111	-0,00697160501390451	-0,00227715473065429	-0,00378279089196176	-0,000174514477254677	-0,00333314706231346	9.24473e+09	-0,00200085552516382	-0,000324526622407048	-0,000313370697586257	-0,000341261095543826	-0,000152278972494979	0,00130112139548327	-0,000567851242447265	0,0013808039860881
	Ggen-2-re.geniporus	geniporus	1	-0,000813347958264706	0,0275547574659756	-0,0323694713894332	0,00424192494749739	-0,0266352358828601	-0,000902270458302309	-0,00429003117283569	-0,00458378341939395	0,00363661973949483	-0,00227586585042908	0,00275349076531095	2.63763e+09	-0,000268049128159592	0,000266209907904982	-0,000255362585095873	-0,000244575547578187	-0,000576776096511741	0,000230967325649682	0,000389516732420966	-0,000767949552256551	0,00134058883245341	-0,00159141262917803	0,000724110333745951	0	0,00713115069313691	-0,025939968574282	0,00151306897014714	-0,0193558240433803	-0,0157018415764857	-0,00825065756666727	-0,0166690514608882	-0,00745464485284371	-0,00408312292627135	-0,0048296889130537	0,00057301049318016	0,00057531372175083	-0,000984421820334959	0,00145779612853849	-0,000580300029721498	-0,000636217376247899	-0,000970858171178946	-0,000941096714043279	-0,00164029979400328	-0,000592517186147786	-0,00150442848271181	-0,000639701822408974
	Ggen-3-re.geniporus	geniporus	1	0,00182811498982566	0,0293879635742828	-0,0248924318370613	0,00502215900004642	-0,0192104156495484	-0,000925276922777875	-0,00353818443228097	-0,00531698491330226	0,00252215267413022	-0,00311345300579263	0,00418513110683993	1.98244e+09	0,00169166797299336	0,00130009187257957	-0,000547183214804021	0,00074955316108969	0,000616489990166431	0,000570126189846907	0,00207304572368431	0,000638644033043705	0,00165720569307338	-5.34093e+08	0,000244476644976901	0	0,0129831119067251	-0,0315928383675552	-0,00242890098470463	-0,0169594373658118	-0,0165010207582005	-0,0076738751252961	-0,0126873439783385	-0,00886866526981484	-0,0050696807629218	-0,00591856092748218	-0,00199204977126449	-0,00129327604116778	-0,000650547659382026	0,000444114799088017	-0,000869445210066375	0,000642209364083688	-0,00173438132721503	-0,000501362068696705	-0,000714689889551449	-0,00134632182968917	0,000233387882694927	-0,000249126687293595
	Ggen aug17 big no3l.geniporus	geniporus	1	0,0209366534255964	0,03567511155397	-0,0119188792685723	0,0104092207974368	-0,0116278087713473	0,00408559396189518	0,00185029912336493	-0,000491795865915004	0,00606026430634033	0,00065297737742607	0,00430400624537249	0,00188842228092532	0,0028759398926829	0,00148808959868644	0,0014299031271718	0,000903080364361559	-0,000596450441788518	0,00119309560363527	-0,000960142752075808	0,000711244955541158	0,000523844768779464	-0,00067789749495622	0,000893606066543451	0	0,0303254398284818	-0,0242728132594536	0,0092642382816388	-0,00893357536216421	-0,0128457792058565	-0,00480688100031469	-0,0138219822408061	-0,00569516108651571	-0,00642186399447032	-0,00331267765076311	-0,00186785668885822	0,000522230293948078	-0,000259677092293928	0,0019702888694371	0,000882334612346682	0,00117773552866418	0,00105832754799514	0,00130151797937424	6.13683e+09	0,00168296530889113	-0,000544241625092013	0,000399213596768068
	Ggen aug17 medium no2l.geniporus	geniporus	1	0,0209461975543573	0,037625159150915	-0,0112457535813063	0,0127926719429589	-0,0157336365609611	0,00486772703144964	0,000859720830567175	-0,00147542303651523	0,00744295516231509	-0,000706291350531878	0,00510909446784445	0,000767830519852201	0,00147947593042248	0,000710502495280647	-0,000925816115190746	0,000858227707097307	-0,00221678532821796	0,000960609083077413	-0,000839629529023791	0,000293467961060105	0,00076328264673618	-0,00030715095501934	0,000680421144060383	0	0,0258317870699345	-0,0274038656994033	0,0120412525112995	-0,0181619135974021	-0,0105689068924828	-0,00826173945223682	-0,0140287390018725	-0,00806486342700483	-0,00801469067156638	-0,00419442975517509	-0,0044014591371637	0,000846178087489652	-0,000998829067651936	0,00143963554109035	0,00204583296383516	-7.26036e+08	0,00162408466081974	0,000357465627998743	-0,0012702948078825	0,00130214521758822	-0,00202316595636924	-0,000548305427464895
	Ggen aug17 small no1r 1.geniporus	geniporus	1	0,0265179582671443	0,0345193965022094	-0,0154797512275756	0,0172165710577306	-0,0215949856072256	0,00841531827851189	-0,00330782461709137	-0,00240804162020752	0,0053232307288966	-0,00175891875961117	0,00214534326173368	0,00204283390129366	0,000175582260698835	0,0020052924429341	0,00189335366511808	0,000998361524308845	0,00154034042171465	0,0016822682804049	-0,000156636211148327	0,00113528948505629	0,000761110930276278	-0,000671711623454741	0,00126663153872612	0	0,0127248687082035	-0,0272502365481182	0,00352017037930226	-0,0154588911612549	-0,0128014440615491	-0,00662316964957555	-0,0109868207545584	-0,00662208441568985	-0,00232719886170631	-0,00499245644019872	0,00024608787301468	-0,00112101432768155	-0,00022666472977713	0,000575183603928862	0,000724339802723995	-0,00041013993250146	0,00104248603897221	-0,000273840307759591	-0,000323028215205476	0,00131515439646718	-0,0010637306656869	0,000519192525026637
	Ggenmon-1-re.geniporus	geniporus	1	0,0079758083066382	0,0178141793285237	-0,0166379781267475	-0,00328279141037708	-0,0305007526057136	0,00157210654321627	-0,0124764493493311	-0,00412062654400083	0,00208124337667211	-0,00232548092613857	0,00143715611060094	0,000298057031371479	-0,00117296255598153	0,0016438645426992	-0,00286485317610002	-0,00151084403418387	-0,00234553678729919	-0,000716558594449261	0,000327229180510723	-0,000156128311690453	-0,000367318717270115	0,000720532781889884	-0,00145959946970864	0	0,0395650982592355	-0,0301005466351475	0,02385007535038	-0,0236867647585749	-0,000580289789664073	-0,00949795676784695	-0,0112887948431753	-0,00192420246499766	-0,00946341318499722	-3.12364e+09	-0,00514445998886585	0,00102712390738984	-0,0018448602441719	0,000535086266507526	-0,000671426969919556	-0,00140714734523906	7.78711e+09	-0,00150690091979919	-0,000853900976746827	-0,00152004736606033	-0,00149700408964515	-0,000421837936088275
	Ggenmon-2-re.geniporus	geniporus	1	-0,00305844170592146	0,0115026378016977	-0,0235952558128529	-0,00108865959422619	-0,0261572003855245	0,0056580468878833	-0,0080400549689095	7.86042e+09	0,00491581147825564	-0,000178775899961445	0,00454201271691816	0,00319789392022403	0,000114490839062225	0,00368621950955997	-0,00305362305497692	0,00284778667162627	-0,00311223844669368	0,00161795831941174	-0,002125880760635	0,00163542756835778	-0,000764568085392378	-0,000352389084784546	-0,000553078455686519	0	0,0272801421358994	-0,0259192460971605	0,015364149598185	-0,0215067495344579	-0,00188040900848275	-0,0115668402999659	-0,00996019590200322	-0,00265408948478926	-0,00859960479261064	0,00131417342341958	-0,00324596146254575	0,000764269249051468	-6.59501e+09	-0,00108632357085549	0,00160478944151234	-0,000561007094512446	-3.35654e+09	-0,000601070820335663	0,000670226412091669	-0,000836680989104633	0,000559476471933358	-0,00168513862488884
	Ggenmon-3-re.geniporus	geniporus	1	0,0328434561856161	0,0229388742384427	-0,00808789490822826	0,00931667657008829	-0,0206713914240291	0,00809926571928982	-0,00747045154060122	0,000326718629658214	0,00411953258821019	0,000244443865323081	0,00534759261357712	0,00209755168667328	0,0016831486438054	0,00241217925449758	0,000829132064285029	-0,000172003649521337	0,00104769974660577	-0,00129194058882414	0,000379163334562043	0,000338323020149726	-0,000452352474716629	0,00157382666821579	0,000218184364127609	0	0,0314974983775542	-0,0368393997414617	0,0244674012216882	-0,0224711365022546	-0,00150689933993154	-0,00603044218199167	-0,0100447993739573	-0,00466575513285453	-0,00651257254908421	-0,0046084309061874	-0,00156912099822642	-0,0018251744606906	0,00101007372476831	-0,000736207014963402	0,00251554744377572	-0,000723701892985403	0,00293172436299134	-0,000976530719467634	0,00171538359322814	-0,000648289099570708	-0,000333990027625766	0,000574849845885079
	Ggenmon-4-re.geniporus	geniporus	1	0,029880193083547	0,0173827540865305	-0,0184879244134453	0,00704890805967324	-0,0286207077585821	0,00610327085084487	-0,0110013367029563	-0,00283054726002399	0,00277000443034885	-0,00394162209321923	0,0033765059598598	0,00093707637837779	0,0015186815144688	0,00186831525765299	-0,00150198483538458	1.91323e+09	-0,00183022548979943	-0,00021258593185582	-0,000815648789788832	0,000113862928680071	-0,000693431440551917	-0,00145862853372917	0,000514688095552152	0	0,0278117956472263	-0,0371992692898166	0,019798662884412	-0,0253101533084975	0,000559941953973797	-0,0113573803277259	-0,0106166597459143	-0,00334401644727565	-0,0111988807815878	-0,00390178618141257	-0,00436968142841529	-0,00264913614404681	0,000876293916626442	-0,00209541709031806	0,00220321350237545	-0,000330797609396092	0,0020791563823152	-0,00101682315691659	0,00222498235123271	-0,00166195033496646	0,000665534604015619	0,00039466179145659
	Ggenmon 1l gedreht.geniporus	geniporus	1	0,0144314695533774	0,033737148376325	-0,0242440356771622	0,00697124657194466	-0,0270771851145462	0,00171467059802534	-0,00576322058429648	-0,00675886271709377	0,00542987313383129	-0,00425780494324923	0,00302300758285857	0,00043703145766553	0,000373178327163793	0,00349121676326931	-0,00135657449198443	0,00169557978542482	-0,000206052665496361	-0,000536053995418309	0,000782467097227878	-0,000845163200319366	0,000308898793339223	-0,000951116838692402	0,000154103429719619	0	0,0026838737737761	-0,0342942414831116	0,00770240134360906	-0,0188305493077285	-0,0104701785288546	-0,00859513515135185	-0,012117243480004	-0,00811429102900104	-0,00578140069728446	-0,00494225951267627	-0,00152357038779384	-0,00108002824099361	-0,00118942447604427	0,00112846587139163	0,000336532862231447	0,000552856944179476	-5.845e+09	-0,000391132844101569	-0,00176468032214743	6.21026e+09	-0,00145488881963073	-0,000620143895798324
	Ggenmon 2l gedreht.geniporus	geniporus	1	0,0227675823076381	0,0307238069851866	-0,0258205116022905	0,0122523893526642	-0,0288945968402329	0,00113208497450939	-0,0092750526670781	-0,00539830568062925	0,00115856477775139	-0,00177222656148412	0,000218916395337063	0,00218857113758959	-0,000865820790292396	0,00225251155862485	-0,00200118492180153	0,00292817999357152	-0,00342147366239543	0,000745086003845929	-0,00172054830723926	-0,000377575183024936	-0,00134663152165428	-0,00031393522652157	-0,00139985323139508	0	0,0250901462698215	-0,0333336954913181	0,0188958159631037	-0,0200429753734151	-0,00183037578398558	-0,00330325730981407	-0,00844664267715338	-0,00243303994447359	-0,00424919828885309	-0,00529124218538571	-0,00126815346249489	-0,00278388907290286	-0,000259182364589326	-0,000650845898771453	-0,000512432180720958	-0,00010776671309935	-0,000546331629255247	-0,00104170960252289	8.93826e+09	-0,0015152931570999	-0,00010710859666375	-0,000671962250797267
	Ggenmon 3l gedreht.geniporus	geniporus	1	-0,0001406820545257	0,0403092582028343	-0,0258158745397757	0,0106581807662967	-0,0134969355016593	0,00244846702153037	0,00233002747728105	0,000943340372586581	0,00335301232789489	0,001859127846614	0,00313503129172507	-0,000115619778008758	0,00269610873898193	0,000482329381664856	0,00118487884826166	0,00172984761558828	0,0017776408959867	0,000580675058836278	0,00177085130884826	-0,000495031303067202	0,00119000227079831	0,00018798489096057	-0,000248489339821494	0	0,0109364914642427	-0,0291421709246962	-0,00565563752889692	-0,0144570449140029	-0,0199188173526021	-0,00853686906546175	-0,0131990493379841	-0,00900593337325053	-0,00277573601623494	-0,00470753408761728	0,00175958482652258	-0,000104436171347669	0,00101669490218664	0,00252257408242056	-0,00210011471570367	0,00140730554198489	-0,00164873611341942	-9.8438e+08	-0,000757209617800452	-1.62167e+09	-0,000244286676305737	0,000645625496710038
	Ggenmon 4l gedreht.geniporus	geniporus	1	0,0248245092835915	0,0174773023239722	-0,0266378580050062	0,000301491344708003	-0,0365182364820977	-0,00193800890807988	-0,0142382809410571	-0,00798193448729731	-0,000984953994743966	-0,00401060881292797	-0,00167309200498937	0,0021409537881	-0,00326080522947227	0,00170887613226206	-0,00359109280593671	0,00024303177075023	-5.03835e+09	-0,00230029435632269	0,000137226846800057	-4.31713e+09	-0,00109831662240266	0,000756409094892501	-0,000167189448717684	0	0,032664187314943	-0,0365669856158446	0,0256015703464051	-0,0180062749499183	-0,000853626143130691	-0,00561924140521587	-0,0122095280350031	-0,00126448433680873	-0,00909394918068862	-0,00163252087852132	-0,00391525536712618	-0,000869269100282627	0,000933745866284977	-0,00263410960807797	0,00350788122962896	-0,00169951617034402	0,00237222369220155	4.80408e+09	0,000686893322472665	-0,000145193998207656	-0,000366811076879684	0,000446735665557167
	Ginc J1904 l_160118.incognitus	incognitus	1	0,0130231515573501	0,0328719760348298	-0,00210590288245999	0,0193039595611166	0,00119081210384479	0,0114298345772188	0,00564807610298644	0,00367589295908542	-0,000145584915893056	0,00131334879276059	-0,0021054301587608	-0,00199145090220515	9.14979e+09	-0,00375097678514133	0,00206910886544652	-0,00224962121670146	0,00127333717765164	-0,00170049504091426	0,000110062311591765	-0,00137565151504818	-9.85748e+09	-6.02688e+09	-0,000778191955810178	0	0,0316857029449138	-0,0487167278963506	0,0177268938157132	-0,0368348042187055	0,000275395383225294	-0,0168163213419551	-0,000413777154813033	-0,0073959096757753	-0,00151053116313036	-0,00250768178818983	-0,0057784453263366	-0,00165248747071234	-0,00495566854159444	-0,00158211067112945	-0,000361959538589935	-0,000402185855971973	0,00123405057851302	-0,000181251752223986	0,00080899056142777	-0,0012146476075557	0,000584786981376891	-0,0014282920015856
	Ginc J1904 r_160118.incognitus	incognitus	1	0,0172718201362369	0,0351637601648961	0,00635220459796737	0,0158743083429321	0,00577865923168856	0,011851935227301	0,00881655663127947	0,00248918719956415	0,00493910790855058	-0,0013949091356715	0,00320746854237895	-0,00563957438390433	0,00554619462138168	-0,00575054031947895	0,00671041898298093	-0,00309632762314021	0,0021826320081723	7.2583e+09	-0,00115538756086267	0,00140370895829444	-0,000728196940568155	0,00115708566006574	0,000753128233754223	0	0,0207047183752937	-0,0362100010564495	0,00774126173630053	-0,032909681606973	-0,000716719695035499	-0,0166776285628282	-0,00130695100957375	-0,00631753405515432	-0,00142394318963069	-0,00162397029466745	-0,00509061826960747	-0,00180676879470025	-0,00365211275282068	-0,00309501331000043	-0,00102188292067361	-0,00308063135515618	0,000776749719366016	-0,000863431664406477	0,00110117389279164	-0,000128534336262868	0,000568491424485887	0,000689710583217777
	Ginc J1906 l_160118.incognitus	incognitus	1	0,0296581950146678	0,048941805427841	-0,00570027216095531	0,0298478096693916	-0,00126497005805053	0,0191703526451862	-0,00116546494571997	0,0102482596168394	-0,00193195948332524	0,00259209113811371	-0,000529511173286883	0,000487631550471272	-0,000427528621327797	-0,0004371494909821	0,000373958217651153	-0,000413838061228529	0,00069886533762611	-0,000333223968061627	0,00103761807985408	-0,000700760443262837	-0,000126645252623737	0,000249782950409692	-0,000732211195105328	0	0,0125706224491664	-0,0412629078384833	0,00559703025777057	-0,0276559306248181	-0,00129407446667067	-0,0124126617426554	-0,00395682455619801	-0,000217286988510453	-0,00488465487685123	7.09777e+08	-0,00101706035936305	-0,0040966239798741	0,000896952298068276	-0,00229205229735756	-0,000187726135755522	-0,00160378293257	0,000449817147428307	-0,00270682103248682	0,000614512524513721	-0,00153966954431669	0,000309119346143042	-0,00073091171127454
	Ginc J1906 r_160118.incognitus	incognitus	1	0,031282553470412	0,0476526566357505	0,0119146567677719	0,026770256569137	0,000468214910954343	0,0205045778788725	0,00031409058875749	0,00844445731954456	-0,000872693410487916	0,00380926975200509	-0,000511722435329826	0,00116648204709475	0,00274546919044165	-0,00106440990217941	0,00355117063581855	-0,00158677544202191	0,0021447475227337	-0,000853659041285956	0,000750243032628951	0,000905631700361551	-0,000257432136250482	0,000636746605553736	-0,000180662583464331	0	0,00587247750948653	-0,0395868471950844	0,00604745918327597	-0,027665370476164	-0,00125271619188335	-0,0089268031035159	-0,00477942492882654	-0,000226430393796891	-0,00276459465644457	0,00158945478769919	-0,00303874677070641	-0,00136837207755848	-0,00263369167661249	-0,00108125164103911	-0,0018116664972135	-0,000777091397621052	-5.03428e+09	-0,00146891562185462	0,000594827783083875	-0,00142739586741608	0,000413592128573873	0,00047233151471787
	Ginc J1907 r_160118.incognitus	incognitus	1	0,00677565479716818	0,054879637540589	-0,00864759019522131	0,0382259632178802	-0,00537573761745481	0,0227421822995546	0,00417268699573186	0,00530618154497424	0,00483217056225179	-0,00122030854977003	0,00152575738442973	-0,00135419125880223	-0,00192116386898989	0,000675695887358962	-0,00308910426120548	0,000422206168190963	-2.7265e+09	2.95678e+09	0,00114420349487652	0,000555178197325785	0,000105449129589016	0,000602936145475657	-5.33818e+09	0	0,00947807140326017	-0,0374122808802057	-0,000107887675067514	-0,0237640454419814	-0,00754325951266869	-0,00497418253731464	-0,00124070212718661	-0,00166807513726458	0,000286038888873965	-0,00297410074916686	-0,00226806407058128	-0,00318904369221763	-0,00129861119253271	-0,00205699688154191	0,00108463746410292	-0,00053869290975578	-0,000188930387163606	-0,00076106550501597	-0,000320244706730671	-0,000508249042383815	0,000944375510142596	-0,000177339869407518
	Ginc J1910 r_160118.incognitus	incognitus	1	0,00772448524549978	0,0618440001614255	-0,00450691695036083	0,0388239072392284	-0,0025381185087381	0,0208986089408641	0,00315987615495599	0,00430955430675407	0,00266484119505648	0,00196226175096848	0,000578880603093956	0,00270171655127402	0,0018805716229436	0,00140104865634113	0,00110421498893895	0,00102388994275505	-0,00136745955021438	0,00146160957306813	-0,000592403019983961	0,00117378281456485	0,000405082468303013	0,0009196443341737	0,000555961860754491	0	0,0105848143435461	-0,021890127684925	0,00926653647632323	-0,0185315941004918	0,00238749156384125	-0,000303364716895258	0,00306349394997081	0,000886091755359321	0,00313152492434548	-0,00206104728345722	0,000186534973985179	-0,00184015347001414	0,00195289650488761	-0,00204697712730084	0,00200647966998849	-0,00137999329877854	0,00125167765517009	0,00019862953112971	0,000313458518801939	0,000918795019338427	0,000295122040469249	0,000300319183920167
	Ginc J1911 l_160118.incognitus	incognitus	1	-0,00696554985741206	0,0589730304238397	-0,00939579355757133	0,0337616933916934	-0,00291362111029224	0,0202849808964355	0,00323421971195712	0,0031476236558962	0,00275611209141792	-0,00185131718441217	0,000470678936640315	-0,00136269929665533	-0,000991592016804544	0,00109295864917158	-0,000524234925464873	-0,000244223641368832	-0,00151945042407224	-0,00127209628018544	0,000344014460784413	-0,000601423954036605	0,00108718169569031	0,000686791422494746	-8.90454e+09	0	0,0190369591338198	-0,0365199606706822	-0,0016970530028623	-0,0278079604513868	-0,00864660800894577	-0,0052354070178494	-0,00425478725969993	0,00127707787105416	-0,000370544904404268	-0,00382657520951851	-0,000223716268994638	-0,0057669234109712	0,00167072117033641	-0,00256307317501651	0,000230365036635408	-0,00200206162747721	-0,00102922887257889	-0,000356741314161753	-0,000691342704791791	0,000114142982485681	0,00135385737851074	0,000216033758918767
	Ginc J1911 r_160118.incognitus	incognitus	1	-0,0117030176163965	0,0510121364573086	-0,0173542839116778	0,032513351380079	-0,00683138133646077	0,0184589903699889	-0,000459261457750606	0,00336291624368936	0,00163103911737277	-0,00271044145908502	0,0018475529710502	-0,00237906824443887	-0,00106254467389671	-0,000813942527164717	-0,00197510207772147	-0,000988860327308843	-0,00205476818505765	0,000576809206908403	0,000596674003832883	-3.97637e+09	0,00166230330132707	-0,000330937431120957	0,000596643287461843	0	0,015899652532521	-0,0480009733027462	-0,00184434252769652	-0,0390213398296071	-0,00911429064250336	-0,0114887494681986	-0,00539023554195124	0,000344632327542982	-4.05214e+09	-0,00208495096723424	0,001989097493144	-0,00262824807462411	0,00241489427011187	-0,000982064516308851	0,00108962281106679	-0,00163610597138317	-0,000611173190383405	-1.57539e+09	-0,0021610582967688	-0,000649310434815903	-0,000882105387062307	-0,00168146894783053
	Ginc J1912 l_160118.incognitus	incognitus	1	0,0209364620175984	0,0499122237590074	0,000888814363404006	0,0228018779316251	-0,00285413173093972	0,0173046968064734	0,000681891575023829	0,00809168187900254	0,00156401525770009	0,00214717196678016	0,00159350832637159	-0,00120146286120771	0,0028045517839484	-0,00160565131589426	0,00341115645820761	-0,00060335386666554	0,00220700467098176	0,00078645799192327	0,000254889600837299	0,000812985845661247	0,000210518015282692	0,000243820234437222	0,00106776152650215	0	0,00578672254616171	-0,0312007314711408	0,00515078202065639	-0,0297286522805474	0,00148099487281856	-0,0125664218933673	-0,00230820997113088	-0,000513058446564104	-0,00288556970391163	0,000988074429141792	-0,00228493295424028	-3.95628e+08	-0,00143830434341012	-0,00118356141960443	1.1237e+09	-0,00124088911642382	0,000439846273814656	-0,00103536012912292	0,000589470834132747	-0,000903217907559446	0,000296173386470096	-9.98601e+09
	Ginc J1912 r_160118.incognitus	incognitus	1	0,0106973363707542	0,0502677887893139	0,0013238207293566	0,025614140778774	-0,00180006265702774	0,0195962956865381	0,00203090802952676	0,00590309167729938	0,00335176725316845	-0,00147434659381899	0,00360895435679361	-0,00185625569443952	0,00346895750716869	-0,000482341922487877	0,00265308617945083	6.85672e+08	0,00215455687498708	0,000277523287794193	0,00134807420784054	0,000579290284736152	0,000343976596529629	0,00122874589079426	0,000108469834158806	0	0,0100198722422118	-0,0373927218705104	0,00530936887954027	-0,0310822685001061	-0,000536680952539117	-0,00985871893657709	-0,002564600453903	-0,000169911788486303	-0,00161355066488698	-0,000311932499348095	-0,000699529411447517	-0,000510770949083344	-0,000668930134036166	-0,000531080580179473	-0,000158727061917259	-0,000693636383139338	5.07682e+09	-0,00108508923239258	-0,000406576526834613	-0,000716706200409702	0,00031681056445557	0,000213570109982318
	Ginc J1913 l_160118.incognitus	incognitus	1	0,00963536924969622	0,0406815822800636	-0,00969036650060391	0,0271875197467495	-0,0126545224904283	0,0188768850262605	-0,00331847444412377	0,00778377644519302	0,000910591911476475	0,0030802604698055	-0,00251001819490678	0,000532151564249424	-0,00199729367657986	-0,000745162715940559	0,000701861429866299	-0,000644277129937391	-0,000525965986530454	-3.02207e+07	-0,000772913048120192	0,000243411852203117	-0,000537702293890501	0,000588339914847281	-0,000518757588533474	0	0,000536164571472621	-0,0318986769789484	-0,00114527865226391	-0,0309828247210284	-0,0080974792327554	-0,0140790812696338	-0,00694700329119704	-0,00269244710774883	-0,00343068631196904	-0,00135709807261305	-0,00267692247281043	-0,000769564749620744	-0,00138548530871653	-1.36274e+08	0,000306650713050627	-0,0011483441854482	0,000710830524258657	-0,00206382552272786	-0,000217346611304032	-0,000918049188991971	-0,00098956320572841	-0,000707197705039507
	Ginc J1913 r.incognitus	incognitus	1	0,00887888015812863	0,0436244329141359	-0,00525008307010864	0,0205892050573891	-0,0137718427533509	0,0181646924314746	-0,000444959918679971	0,00428492300247093	0,00110064265874015	-0,000561674533160165	-0,000849267345696388	-0,00230630312369933	-0,0022255237535896	-0,000406215687122332	0,00164968147990097	-0,000301984435763408	-0,00197078801325373	-0,00135635849770501	-0,000908273899789635	-0,000352804151703528	-0,00111113346791282	-0,00137827614257776	5.6621e+09	0	-0,00292821985879552	-0,0369765138160233	0,00207975993601015	-0,0356378825928151	-0,00701664119157729	-0,0183128911561425	-0,00570668166946967	-0,000591066723343971	-0,00474222755214518	-0,00176879698624974	-0,00210621706276804	-0,000559045203537078	-0,000994023640518992	-0,00229050875444814	-0,00158482602459776	-0,00101640370575644	-5.87648e+09	-0,00186463770625665	-0,000379186780760756	-0,000980185065378679	-0,000194235208317449	-0,0011475126609359
	Ginc J1914 l_160118.incognitus	incognitus	1	0,00342168789603654	0,0585150188412615	-0,00619689726387249	0,0345063602511561	0,00287224094817957	0,0193049756611901	0,00568885437905803	0,00626468474848385	7.63298e+09	-0,000510010572533983	0,00268134830194601	-0,00116189608751754	0,00241500375878896	0,00146580747035529	0,00147587639489244	0,00210654604477559	3.9285e+09	0,000343969119566021	-0,000123776225323629	-0,0010733160932856	0,000619229684848982	-0,00104920702378755	0,000873238651111023	0	0,0199756988554514	-0,0399078274782661	0,0101641527418558	-0,0324290530473331	0,00465614563301606	-0,00769075327603397	0,00311189189065466	-1.56029e+09	0,000566265236184888	-0,0010665380795308	0,000557510842927679	-0,00341684417838204	0,00170872067874046	-0,0019773538159717	0,00070887022121806	-0,00166137476370845	0,000870317423985342	-0,000161699887912876	0,00110893301736482	0,000679037606050978	0,000751461346040544	-0,000271797176635054
	Ginc J1914 r_160118.incognitus	incognitus	1	0,00364842162585316	0,0509046368229656	-0,00428444037558787	0,0285546042948062	0,00209191255578522	0,0172439669564393	0,00393472781482744	0,00250836835271088	0,00071481079193739	-0,00484274820921731	0,00367634454201185	-0,00482331759037244	0,00383264174049377	-0,000665119977940236	0,00182660433425061	0,000347346339256022	0,000598247660459404	0,00174614663228858	0,00057691202138663	0,000327114319274129	0,000950820471222506	-0,000645138936933991	0,00134627464429565	0	0,0212746230830679	-0,051138393341689	0,0103773661840793	-0,0416630211830989	0,00270721375730918	-0,0103517293945236	-0,000573627031989944	0,000342918610096651	-0,00245830889763921	-0,00161371265822361	-0,0033927747029518	-0,00363991485523061	-0,00112138105066326	-0,00254007396232613	0,000453885376553727	-0,00149074074197048	0,000816123127515559	0,000408678196559857	-0,00172123936388169	0,00126426585240412	-0,000488062464818742	0,000768856708131099
	Ginc J1931 r_160118.incognitus	incognitus	1	0,0108668701125897	0,0390998507751077	-0,00514956504915123	0,0238826208268489	-0,0102081404175992	0,0174976332687061	-0,000655673219058372	0,0053453971565418	0,00241242385135746	-0,000654693128171328	-0,00174088665485496	-0,00182887542563701	-0,000791019122865492	7.19261e+09	0,0011769547715629	-0,000316885207019829	-0,00106708787273445	-0,000814211845342749	-0,000980565580393273	-0,000567702388672736	-0,000348713602147606	-0,000609256069885567	0,00013652133475947	0	0,007314969742396	-0,0351818334818933	-0,000154995645556636	-0,0371305643647293	-0,00411484331372708	-0,0164907305097664	-0,00576553073116919	-0,00124695064597362	-0,00385492218283028	-0,000705840444928855	-0,00263584987472758	-0,00202622651852286	-0,00121961854734003	-0,00132186160134614	-0,00130241352631836	-0,00178290010330399	-0,000596699013295665	-0,00169776922215142	-0,000253640903499503	-0,00162970873850993	-0,000935019813390222	-0,000989159463233949
	Gkol-KrkTenki-SS17-no1r.kolombatovici	kolombatovici	1	0,0135555618786882	0,0417861853950366	-0,0122134161992178	0,0261925077004673	-0,0100731499945161	0,0144698263604803	0,00375108603293901	0,00253394154166629	0,0058714638165895	-0,000128331198016501	0,00063512623560359	-0,000187236829329096	-0,0017121951852319	0,000661847695072415	-0,00220418540753152	0,0010741370402783	-0,00226148641346034	0,000267246092885369	-0,000165276784499181	-7.27882e+09	0,00111967337702418	0,000762488754968964	0,000903482017591153	0	0,00454418840321916	-0,0415526885535162	0,000849229620155917	-0,0330176974335019	-0,0102605746134717	-0,00889483416029376	-0,0128658790357137	0,00178544225798755	-0,00512470284048759	0,000558928578012816	-3.74421e+08	-0,000838009074776443	-0,001043744218188	-1.74069e+09	-0,000816337215716788	2.43632e+08	-0,000322065874347648	-0,000809045683998357	-0,00161952363555794	-5.60336e+09	-0,00106385546044582	6.38415e+08
	Gkol-KrkTenki-SS17-no2r.kolombatovici	kolombatovici	1	-0,00858334860159195	0,0237514208975735	-0,0120083658214134	0,0106793209667671	-0,0101690075179629	0,0122267652111368	-0,00292258195754678	0,00363115735808856	0,000694272023802092	-0,00176853827142887	0,000384902184805147	-0,00180114869222369	-0,000449890078547311	-0,000674005691836903	-0,00093537058502607	0,000453485819184235	-0,00176284989651409	-8.87485e+09	-0,00214124516092294	-0,000366817114172211	-0,00187831010640605	-0,000459922614487642	-0,00105111674266656	0	0,00681593118843545	-0,0332182193029736	0,00385813466133053	-0,0343745444005048	-0,00912942848576458	-0,0170944120290576	-0,0118260690534096	-0,00232578839707366	-0,00758315766932558	0,00238611551837545	-0,000826598613192274	0,000709461113940052	0,00207698853849055	-0,000318738316552097	0,0015020707922203	-0,000428680445894755	0,000930195319418586	-0,00113182902377734	0,000521565770377878	-0,000629461359187602	0,000273056911625677	0,00046553018400594
	Gkol KrkTenki SS17 no1l.kolombatovici	kolombatovici	1	0,00452913458715265	0,045249644046897	-0,0103487510299932	0,0239864255352233	-0,00727647080075996	0,0141585174242288	0,00550265138338078	0,000879687077735516	0,00628318919961064	-0,00193539329227481	0,00168991098270302	-0,00020652574463408	-0,000740761538941108	-0,000324248640886152	-0,000340891652794825	0,000325740358781339	-0,000136501173053949	0,00158012886357741	-0,000457620332213113	0,00125602760600856	0,00021540025465772	-4.45044e+09	0,000904603047503242	0	0,00450917067033005	-0,0379448398032551	-0,00420885222048857	-0,0334564179957598	-0,0126053084917253	-0,0104329710957085	-0,0129665468777252	-0,000554333710610313	-0,00507016369563682	0,000262225051100028	0,000731966532126728	-0,000206711636771771	-0,000816170990501484	0,000378516347970303	-0,00171600538811901	0,000217433829197393	-0,0021775182835434	0,000433184392316312	-0,00181450387550019	3.47522e+09	-0,000854623421948222	-0,00066013633649842
	Gkol KrkTenki SS17 no2l.kolombatovici	kolombatovici	1	0,0179127804566044	0,0217502017008236	-0,00905347904607523	0,00639383953909055	-0,0146944070103895	0,00786050764808292	-0,00575405113154935	0,00425432867545238	-0,000851699853765807	0,00132738483776858	-0,000472486320385973	0,000602889026773075	-0,000366182136172268	0,000137372615339487	0,000608370708002255	-0,000535594314410714	-0,000247112099915661	-7.3788e+09	-0,00156799497082535	0,000712598794667892	-0,0017291955775364	0,000674729699163146	-0,00112052434623823	0	0,00917437085114326	-0,045963876177342	0,00168736244438852	-0,0397246632006593	-0,00822056451485014	-0,0190946004378867	-0,0101525182439168	-0,00239109556777401	-0,00785297334055298	0,00230117628413991	-0,00268245087525735	0,00134289621563141	-0,000145142546213378	0,000196275451758558	0,000323262857620366	-0,00139838361645408	0,00135939272673577	-0,00182289280452703	0,000963264212165624	-0,000663188128891467	-0,000466145981424667	-0,00040288961247965
	Gnig-1-R,Pilsey-Island_OK.niger	niger	1	0,0336888152323521	-0,000260634609651755	-0,00863960596787609	0,00373613950020338	-0,0188890531207839	0,0120737538926025	-0,00672320386261972	0,00179483057797642	0,00296074341226737	-0,00400850549777054	0,00126075249692952	-0,00253495748479078	0,000872912283511845	-0,00182952438856132	0,00356231744503567	-0,00100764380541781	0,00248782909498748	0,000683042430777691	0,000625536169582709	0,000468553816893141	-0,000682066883754578	0,000187992233588013	-0,00151502193776653	0	0,0144699974819346	-0,050355945036352	0,0172517093476255	-0,0522385159686982	0,0084270019559714	-0,0246322838985141	-0,00266996868693621	-0,00324101430425604	-0,00449329418356731	0,0034711083670615	-0,0035120646724477	0,00115604781741884	-0,00115665245040895	-0,000476709356403015	-0,00193943102030599	0,000556858837740065	-0,00158595102230858	5.15505e+09	0,000324144968380384	-0,000555643407842781	0,000763081964117699	-0,000445275105173411
	Gnig-10R,Pilsey-Island_OK.niger	niger	1	-0,000835143262995534	0,0353201414069061	-0,0106379129488665	0,0399787360802667	-0,00975405851789547	0,0238155381220909	0,000178377500726161	0,00386840533057636	0,00256919653944084	-0,0014461712387811	-0,000825565871821503	0,000963259257819401	-0,00216641160938236	0,00254317370367372	-0,00136161726395534	0,000302891155967175	-0,000137479450965087	4.52404e+09	0,00117153108837272	0,00109157830384318	-0,00111624439790179	0,00105262672639008	-0,00244962762183286	0	0,0130120641630247	-0,0336510336500941	-0,0119689461652279	-0,0166512712695629	-0,0157674722660234	0,00553413555482361	-0,00498001986364328	0,00297292165821523	0,00275420830786454	-0,00387847937388657	0,00213000158708573	-0,00182492360335563	-0,00177213039907869	0,000386286043022294	-0,00333838724527901	0,000979106605297379	-0,00217783312205041	0,00208195342972383	-0,000715899714390545	0,00128733549797279	0,000930817740621244	0,00073146276498041
	Gnig-2-R,Pilsey-Island_OK.niger	niger	1	0,0246566556504502	0,0220647170353773	-0,0276665681942187	0,0245152311675475	-0,0228818489811241	0,0131199521697532	0,001037136654027	-0,002336057807311	0,00682478892621407	-0,00348924172339111	0,00172608394312907	-0,000979066154676076	-0,000999565923859069	-0,0001608009308314	-0,00201454296081822	0,00157885585173751	-0,0017855533580841	0,000703438000163717	0,000165494360703134	-0,000389332455986598	-0,00095451647440671	-0,000498056099816154	-0,00146382500953794	0	0,0145389501519455	-0,0439934415507305	0,00681933016174057	-0,026439950024476	-0,0154060111612471	-0,00802190835741146	-0,0127501451609702	-0,00588002245320576	-0,000687378855454048	-0,00465661083368493	0,00228543078873999	-0,00249965820304919	0,00130928946223565	-0,0012081466861154	-0,0010467138907369	0,000626573549044996	-0,002183531544102	0,000332741698390629	-0,000210743947081572	-0,00191756502542878	0,0017382912470465	-0,00239338226265808
	Gnig-3-R,Pilsey-Island_OK.niger	niger	1	0,024797276358079	0,0395110205812498	-0,00314370494422186	0,0344639005742255	-0,00859224546286201	0,0235616671138384	0,00373051901486904	0,00445070301154002	0,00515628872311313	-0,0038832368246501	0,000999532534566128	0,000777649023156395	-0,00133720267967424	0,00258921142679643	-0,000508766660168094	0,0022735425842625	0,00191725471902401	0,00147807466818338	0,00134023452750492	-0,000741993509039326	-0,00075616039178497	-0,0001398687684093	-0,000992455600381654	0	0,0146381672309683	-0,0476135848004155	0,0107813374706942	-0,0315324835801359	-0,00360483077393388	0,000847869174663882	-0,00768152813635435	0,00762785004547329	-0,00092402535739098	0,00192947990565205	0,00206508021241829	-0,000854665556226045	0,000341214775841265	0,000300061785641487	-0,00076635817267891	0,00201851255609285	0,000175133145287159	0,00197545079264046	0,00269935778541992	0,00202062193614828	0,00127844910391385	0,000576863573010717
	Gnig-4R,Pilsey-Island_OK.niger	niger	1	0,0165905223552137	0,00922622680626102	-0,00644384355597545	0,0136787781405259	-0,0144058515558222	0,0155676095596214	-0,0035707542357302	0,000723164321235903	0,00339735577023128	-0,00611420770454394	0,00177193334507098	-0,00517917930178547	0,00113220468861359	-0,00251941024473402	0,000466973672401187	-0,00184761486692839	0,000961964735108918	-0,00139701332108109	0,000263295218144779	-0,000793286641967031	0,000429855750563061	-0,000620296266116577	-9.63319e+09	0	0,0185258901322488	-0,0440043931287368	0,00407493184811583	-0,0434283293169233	-0,00290510697152263	-0,0149438362456727	-0,00649264980285983	0,00331556603647235	-0,00536221664114266	0,00209400192282746	1.85556e+08	-0,00213627783531464	0,000572015033443457	-0,00227779345109647	-7.76126e+08	-0,00146849575146972	0,000422779380779905	-0,00232690080307967	0,000900970535681348	-0,00161948205771063	0,000502951570636273	-0,000438347519794159
	Gnig-5R,Pilsey-Island_OK.niger	niger	1	0,0225155494272227	0,0297573513336332	-0,0171798969087489	0,0342441771242967	-0,0142479937277597	0,0177540813091313	0,00336418709233113	0,0024696193229328	0,00813352137758436	-0,00184526650447846	0,00500528933908655	0,00032099805583639	0,00137063712163639	0,00153843388746833	-0,000255558397703425	0,00119931900882312	-0,000406134298010313	0,000996584614995816	0,000422808847331921	-0,00104750772455608	0,00197522376257755	-0,00117092698991511	0,000537550972523932	0	0,0155539891342548	-0,0510295867482964	0,00817867009095329	-0,022155967530153	-0,00618813038630751	-0,00233493576691715	-0,0044382931906909	0,000268171814787576	-0,000699528577023592	-0,00207518053906756	0,00619189752733047	-0,00471436667692858	0,00483236997448442	-0,000585444561067728	0,00123873279134629	0,000874849729062282	-0,000819536328838449	-4.93774e+09	-0,00017670605163968	-0,00124933647773444	0,000855158178891273	-0,00070129748072081
	Gnig-6R,Pilsey-Island_OK.niger	niger	1	0,0353177816893832	0,0285341007694784	-0,00234262339873888	0,0311462143005754	-0,0146911066023295	0,0190088464536191	0,00117386021767775	-0,00107978663322154	0,0100652885706594	-0,00437317060507881	0,00423899856443142	0,000854219031622894	-0,00135475655361317	0,00229331518946217	-0,00146479736706955	0,000857941481886838	-0,000156549146541697	-0,000345005150243349	0,00068452579694588	-0,000875981095739017	0,00162550447429732	0,000238505760534956	0,0012674456142693	0	0,0100691936923194	-0,0463026859394852	0,00536239444272809	-0,0298241116626904	-0,00908197845874157	-0,00387686607297103	-0,00878380677110464	0,00530464482571147	-0,00186998786018881	0,00232594537416718	0,00138462887911239	0,0015604854132454	0,00159165072890526	0,00040393215850549	0,00211037623190478	-0,00194732036444225	0,000940670824688739	-0,000368493395281508	-0,00076873632545116	0,00117376882626452	-0,000716109044273974	-0,00055180762521651
	Gnig-7R,Pilsey-Island_OK.niger	niger	1	0,0219019325036722	0,0434494747605374	-0,0157889946711107	0,0425943604264898	-0,0150017000726057	0,0210315096173312	-0,00488572543240853	-0,000578806183273345	0,00124003441706453	-0,00367808155459087	-7.50627e+09	0,00161062415639594	-0,00332404497548042	0,00348233721443836	-0,00433661751607136	0,00205710210925995	-0,00132330306055557	-0,0010210253770709	-0,000385937314837564	-0,00154115934760979	-0,00259716688523363	0,000458074753439888	-0,00155716711818292	0	0,0119482060765412	-0,0351474067697577	-0,00102363775092686	-0,00743137619424439	-0,00948024296105593	0,00578916055406211	0,000562679834322851	-0,00187696551069211	0,00675919707844565	-0,00442137951565152	0,00392691592740772	0,000574727602240153	0,000878213580735539	0,00232220183914821	0,000967681508703007	0,000405168749900664	0,00120882963580455	-0,000748862775874294	0,000960988811279215	-0,00153276269265613	-0,000317365497560369	-0,000602019603155277
	Gnig-8R,Pilsey-Island_OK.niger	niger	1	0,0316933760779053	0,0266599667771924	-0,0263878279311021	0,0279075061459226	-0,0299453458055761	0,015910986830578	-0,00184512908531133	-0,00087817928798751	0,00871533378701122	-0,00345813321022683	0,00257822316444071	0,00283427694095928	-0,00177924245919069	0,00296531734966854	-3.45347e+09	0,000417733975846162	0,00108406925150497	-0,000305378030595714	0,00144350435683768	-0,00185544398857014	-0,000375411749477421	-0,00024664146791755	-0,00116427325091849	0	0,00986787164479194	-0,0526809027065892	0,0079570544541484	-0,0323886955003369	-0,012947564331075	-0,00597825921178414	-0,0130672346979825	-0,00176768900481029	0,00113259937707472	-0,00265474678170084	0,00110210210020309	-0,00335488762401667	0,000132975844136791	-0,00289464870625388	0,000367438310741228	-0,00252166402564808	-8.52731e+08	0,000246342658469351	-0,000166589462853113	0,00197054097708302	-0,00147942253901059	-8.47226e+09
	Gnig-9R,Pilsey-Island_OK.niger	niger	1	0,0287172472366733	0,00715818025907303	-0,0158520599825979	0,0171889978836384	-0,0243014040131708	0,0146223664839482	-0,00641908036758807	0,000870318650176997	0,00538878285706493	-0,00302126401816623	0,0034090335914487	-0,00190231596116955	0,000315417450135036	-0,00155023830078442	-0,00110369341412923	0,000691013649295501	-0,000806048614296232	0,000670997162284625	-5.47504e+09	-0,000749669547322036	0,000860537141302686	-0,000753821953049191	0,000490356249347376	0	-0,0103230025704826	-0,0504683534776456	-8.07338e+09	-0,0353508649131736	-0,00291853899069021	-0,0108293763957911	-0,0107799272758841	0,00519239800222603	-0,00850608228035179	0,00205651289500769	0,000205009597112699	-0,00553319151805904	0,00332844348258377	-0,00400873137814352	-0,000360787639183641	-0,00179285578940416	-0,000938216686728695	-0,00121088767028744	0,000176406633783933	-0,000695523926987671	0,000664641046356603	-0,000454984588914438
	Gnig 1 L,Pilsey Island_OK.niger	niger	1	0,0358368520813708	-0,00447293364237163	-0,00141929048116667	-0,00325993692395239	-0,0152068798939866	0,00909185032522292	-0,00566563198133646	0,00342100469676442	0,00150127912992201	-0,00322415704181512	0,000950967889938937	-0,00252980564285964	-0,000215942718507341	-0,00250714641920603	-0,000810975458704155	-0,000890270200365926	-0,000774487138193246	-0,000781883913969134	0,000169991964791583	-0,00047612416230427	-0,00037620860094042	0,00124139836623194	-0,0011108838519817	0	0,0155320575523328	-0,0540261238031889	0,0188742442824072	-0,0535648474695118	0,00624937937650543	-0,0223195273228195	-0,00540642256153665	-0,00132021246268564	-0,00774861555547452	0,00466288664677674	-0,00538111914755236	0,00192261274598594	-0,00268804324075936	0,000884329870335213	-0,00201697958981824	9.09073e+09	-0,000115119077317134	-0,00076843888642771	0,0011690218786494	-1.74094e+09	-0,000139462166321676	0,000590835707233567
	Gnig 10L,Pilsey Island_OK.niger	niger	1	0,0419002980264168	0,0427887841552961	-0,00553929909127504	0,0428768911013521	-0,00628344286079647	0,0187441380642577	0,00510377685624418	0,00406470602281064	0,00182101973689286	0,00230433550520729	-0,00172482234218766	0,000743289368380466	0,000492113763733365	-2.52573e+09	0,00187298356866595	-0,000584720557734853	0,00223464182840485	-0,000391722170506086	0,000118029674707884	0,000624852711209305	-0,00215633383075341	-0,000409155280517437	-0,000735724603960789	0	0,0288492968323162	-0,0347329558187337	0,00362661726166237	-0,00976209746990464	-0,0104538920482754	0,00442912411423315	0,00144764123492753	-0,0023895473926414	0,0105929056159182	-0,00436390221956048	0,00432704861554009	-0,00121907037541235	-0,00225622700238004	0,00105330397208255	-0,000753262397366259	0,00170622051462592	0,000624867989314602	0,000684691874189235	0,00110496347995828	0,000497063023137615	6.50189e+09	0,00123115617325227
	Gnig 2 L,Pilsey Island_OK.niger	niger	1	0,0175262254100383	0,0393177626568169	-0,0172075549437132	0,0340376941837542	-0,0146155394706372	0,015935495224575	0,00642746329306109	-0,00030567756702916	0,00728309549905558	0,000363126598254263	-0,000340046112677046	0,0018205917293889	-0,00205155051179544	0,000954249984217405	-0,00143734938679787	0,00297282535652403	-0,000391311521205842	0,00159456347979996	0,000224029344833729	-0,000482241034345545	-0,000310865896936408	0,00112226289432318	-0,000251039480354814	0	0,0101343458841933	-0,0337690794007608	-0,00540580456057039	-0,0185883443186851	-0,0195202898496712	-0,00161324290926951	-0,0120618643663378	-0,00150011272381167	-0,00201004519062638	-0,000288476557896674	-0,000253083893688681	0,00202568523638836	-0,00130943121863379	0,00164013567356902	-0,00274644501226665	0,00175358209834968	-0,00154918309784628	0,00167290025668443	0,000576605880196301	-0,000832321034686752	-0,000133205723084249	-0,0019325409424831
	Gnig 3 L,Pilsey Island_OK.niger	niger	1	0,0697661561175702	0,0312567871079961	-0,0113065255464347	0,0421616188733612	-0,0207821760154685	0,0241756284142906	0,00459756233302534	-0,000351840884447569	0,0123250307572069	-0,00121639634418141	-0,00064181955564931	0,00348275958274822	-0,00410836615955054	0,00106880239393015	0,00169569176750066	-0,00110399435823333	0,00261778841262236	0,000142338108664137	0,00106700472520537	0,000915980342697282	0,000701275982600032	-8.08995e+09	0,000164126626475811	0	0,000220613212907166	-0,0375192822930922	0,00760064762658069	-0,0335349700753155	-0,00643589419026075	-0,00759192842733187	-0,00964887345895888	0,00113536234078356	-0,00384678650817776	0,00146412841684034	0,00160942705529537	-0,00136537673077152	0,00414419910325035	-0,00335231176694791	0,0018508739603411	0,000392968203612085	-0,00110434018145451	0,00307728181244648	-0,000570475199528265	0,000647973024541044	0,00250728067863372	-0,00067079773191925
	Gnig 4L,Pilsey Island_OK.niger	niger	1	0,0599261189480085	0,00703912839777978	0,00918627570548147	0,0137457222117619	-0,00668889880536951	0,0127923013215197	0,00203795657996274	0,00229233306090322	0,00680965484536229	-0,0031829049069761	0,00367679222666617	-0,003750550686849	0,00148092072264528	-0,00104060158065848	0,00114530084803249	0,000267674982083883	0,000592331525081934	0,00121187913067358	-0,00128724773083561	0,000633677298779516	-0,000505191217488662	-0,0014896129408264	7.11953e+09	0	0,0387088146744052	-0,0542662141837542	0,0219397415803498	-0,0447636838977155	-0,00230094531229577	-0,0160312089274809	-0,010517751679202	0,00156370138772719	-0,00882225715596446	0,00487141040759667	-0,00463353122687788	0,000807697568011037	-0,0021104978723431	-0,00136850970189387	-0,000643340952587625	-0,00175957687316619	0,000459823970442098	-0,0010047751226033	0,000839776109223884	0,000122764636388497	8.73684e+09	-6.09433e+09
	Gnig 5L,Pilsey Island_OK.niger	niger	1	0,0324501175932178	0,0483086857045341	-0,00918189924615626	0,0343256895434322	-0,0123581714539468	0,017881566121956	0,00457859818576424	-0,000852382616891321	0,00648964940103716	-0,00209470195907018	0,00262670958407263	0,0035302486605626	0,000672373720911739	0,00389882863827504	-0,00264580915011375	0,00127118653279245	-0,000942878847253468	0,000296904423611878	-0,000619632190045688	-0,0016535455186104	-0,000628140834245658	0,000504666925343227	-0,00202942070975704	0	0,018437224005867	-0,0442402660717725	0,00580356656953418	-0,0217541387695416	-0,0138152672472734	-0,000877531727507926	-0,00648654690764968	0,00263174010789699	0,00119843040847535	-0,00300196583638562	0,00355712307110521	-0,00491599889406519	0,00152591640654788	0,00168664240107854	0,00200049756573298	-0,000984421224608065	7.7903e+09	-0,00142490382119934	-0,000311012802572529	-0,00290558196976415	-0,000189414561352778	-0,00122318625724888
	Gnig 6L,Pilsey Island_OK.niger	niger	1	0,0402009037085072	0,0184778372867833	-0,00416234675882544	0,0255949671067516	-0,0172703416132479	0,0214789265822191	-0,00327044628236203	0,00282872394525365	0,00692988284736478	-0,00652261753072088	0,00492151427047935	-0,00254334173064023	-0,000686648646213816	0,00226584959777656	0,00048307911843124	0,00214134891894934	0,00166737104210901	0,000599153770569473	0,000431702538445311	-0,0012677320165888	0,00103542511476191	-0,00186417704483377	0,000712363213352402	0	-0,000792732168653098	-0,041438061432648	0,000465057376031778	-0,0370194617848283	-0,00294400434690776	-0,0120877878377626	-0,00522877144718021	0,00254692216877125	-0,00162910103354986	0,0035376026668793	0,000766318937138784	0,000722023341596288	-0,00050310450275388	-0,00241845522780246	0,000479748973274353	-0,00247548144126149	0,00168713261291885	-0,000729480695168157	0,000550099944776824	0,000238366925354856	-0,00102197116227524	0,00124186525702242
	Gnig 7L,Pilsey Island_OK.niger	niger	1	0,0350314324810877	0,055240504966873	-0,00791614836343224	0,0440554116777489	-0,0127341325503513	0,0165856831441048	-0,00114254620811603	-5.18215e+09	0,00127977088594868	-0,00147633525713965	-0,000958066187278915	-0,000522621991595992	-0,00270487106956384	0,00188308223686295	-0,00180567234143057	0,00146168392491857	-0,00183638262357665	0,000178100821219512	0,000105489616276793	0,00121555246844968	0,000152833948218586	0,000328833233696684	-0,00158070107317328	0	0,0102391670436649	-0,0334128929488775	-0,0033675796427578	-9.70341e+09	-0,00845430297744237	0,0105918920292713	0,00245909815672495	0,00077075392970529	0,0106665753616566	-0,00295428356664744	0,00753405554687534	0,00107177642243594	0,000817771260278316	0,0027871177227837	0,00113229391704429	0,00273298209599431	0,00140681978759695	4.66228e+09	0,000524521677479698	-0,00197318694036912	0,0012568476212666	0,000225195476380399
	Gnig 8L,Pilsey Island_OK.niger	niger	1	0,0284796740932881	0,0312962384839327	-0,0242375967637074	0,0266090555422372	-0,0205711852297998	0,00559278236080871	0,00525513913505532	-0,00717249123266525	0,00740475558579344	-0,00195109929356304	0,000655602870129862	0,00394892858487401	5.78538e+09	0,00281697484658731	0,000965557753336336	0,0017043989162301	0,000252009728482309	0,000277635740367216	-0,000118455085547336	-0,000171140316902882	-0,000244002835684145	-0,000435070296174976	-0,00149851623421346	0	0,0252162370964629	-0,0548449547752145	0,00970778168094912	-0,0325215301011043	-0,0117747660107985	-0,00934713144905385	-0,0107704228121222	-0,00226089469309817	-0,00199691683998323	-0,00476690189406336	0,000895396594935496	-0,00513135368703564	-6.89043e+09	-0,00145171190806659	-0,000924515792509107	0,000462651003492377	-0,000547521391399921	-0,000929246930455765	-0,000425407384425817	-0,00169591490611883	0,000578459596968746	-0,00204100310738508
	Gnig 9L,Pilsey Island_OK.niger	niger	1	0,0452882872947418	0,00404415987604143	-0,00560049631331944	0,00677362959367729	-0,0160488181805644	0,0108188097197045	-0,00499849657129809	0,00531079002888376	0,00159280127224304	-0,000659789139274715	0,00280464712479056	-0,000259598224842515	0,00276873771687731	-0,000111393169869579	0,00322554670476566	-0,000180715616151478	0,00147035101796605	-0,00105897819771171	0,000984633931784621	-0,00324310777582286	-0,00118793603149433	-0,000475891373861396	-0,00254774636891518	0	0,00354034100152107	-0,0454984123340384	0,0173747305746699	-0,0475315054993962	0,00512398841802922	-0,016599709752535	-0,00878021083945146	0,00247159011751984	-0,00528319130818271	0,00229641896024768	-0,00133451492864302	-0,00439545867599364	0,00176084609130452	-0,00525595070288387	0,00173739664734561	-0,00143902408873676	0,00164166554143358	-0,00106247662254611	0,001927118533339	0,000764159739495786	-0,000163930372509154	0,000161263137158488
	Gpag-1-re.paganellus	paganellus	1	0,0315536540733708	-2.38228e+09	0,0124856442760323	-0,00857937667961255	0,00264662407455794	0,000786077094756243	-0,000106756233238018	-0,00176551271877324	-0,00157088494497507	-0,00143992845541486	-0,0050164243048926	0,00393846227640952	-0,00465139730546975	0,00597968029354803	-0,00280313491154936	0,00164055548987653	-0,00070582768126676	0,000323700693818337	-0,00115312708100909	0,000314440211171436	-0,00187491400701231	-0,000218126583687305	-0,00140256567240017	0	0,0247934037544463	-0,0638835971995439	0,0181748516632828	-0,0517423793356748	0,00420450983551874	-0,0156042556510305	-0,00342017921402126	0,000339213830956693	-0,00273815109866414	-0,00219010254035664	-0,00157969384941739	-0,00227850795656308	-0,000972886987185924	0,000437986769503226	-0,00109686963657991	0,00147037577271679	0,00125668136602892	-0,00043458823479056	0,00235859699775852	-0,000441026538041981	0,000586497204475862	0,000401403173933517
	Gpag-10-re.paganellus	paganellus	1	0,0272421502759725	0,0346560523021922	0,00380161361089741	0,00732151311361285	-0,00631839790972876	0,00792537336002312	0,00109173608961528	0,00394896074511874	-0,000234198332554191	0,000729591878691957	-0,00324268052417546	0,000117287240586456	-0,00288470489047374	-0,00168592307943484	0,000117932802123969	-0,00201565115962606	0,00114696428014722	5.44408e+09	0,000597569382129402	0,000583166208985722	0,000423239922708916	-0,000626666464531949	0,000312229483764787	0	0,0202359680669978	-0,0502083207011312	0,0245868690184631	-0,0386358632438554	0,00557262218127266	-0,0166528216920328	-0,00201347179955241	-0,00408396641101896	-0,00181238125279655	6.15181e+09	-0,00134843854324725	0,00257690846155334	-0,00256633069881175	0,00197613810515262	-0,00233109331512938	-0,000194677893655938	-8.01034e+09	-0,00260697362263707	-0,000235851806316118	-0,00246193843373649	-0,00103940758277572	-0,00130050661162121
	Gpag-2-re.paganellus	paganellus	1	0,0321797470943991	0,0333532126941928	0,00602946787260895	0,00700521518524391	-0,00344929460338413	0,0057365974216793	0,00262038664590223	-0,000894509268356945	0,00343193365678614	-0,000815815873130848	0,000969872626971978	0,00083220551645172	0,000232787550839413	0,000466405149074139	0,00111608326214979	0,00202742107385666	0,000424244453553658	0,00285106590687769	0,000483645273845537	0,000387550676108978	0,00149609461154913	-0,00112945479710253	0,000822653505952815	0	0,025650933094883	-0,0513503490790309	0,0291666746464635	-0,0464624324961221	0,00590472627638592	-0,0191646829458854	-0,00326137782492381	-0,00654005826890741	-0,00247320446639281	-0,002003137831802	-0,0016449393644235	0,00224102400052698	-0,00358425475198041	0,00231351346900696	-0,0021790684182432	0,000932704916897282	-0,00191123410900666	0,00123341818688264	-0,00209159960770472	0,00164244654088716	-0,00109286148276733	-0,00133291131806557
	Gpag-3-re.paganellus	paganellus	1	0,009476061024295	0,0178730923445333	0,00515191586721966	0,000161420119089044	-0,000258720974354955	-0,000109648336844665	0,00274998342739132	0,00151097426205592	0,00146597164765671	-0,000551317302523378	-0,00010867650490324	-0,000849919227156373	-0,000421784508759167	-0,00126577788789886	0,000492694015054743	-0,00284816124316599	-0,000334807378242657	-0,00233215751217986	-0,000821283662111312	-8.15466e+09	-0,00269658954501943	-0,000534457115658818	-0,00197987005705344	0	0,00781072570615524	-0,0527851547118616	0,00999303413468474	-0,0461392037586378	0,00691178761940971	-0,0247072516139922	-0,00139485346049812	-0,0118548711214302	-0,0026340560918786	0,00014331277247424	-0,00257073887461959	0,00356709096721731	-0,00242286060598552	0,00542637350633772	0,000133749357192207	0,00533404770729068	-0,00153440034765563	0,00110323515164068	-0,000280136322679318	0,000592793446465331	-0,000864133769275007	0,00114286415792219
	Gpag-4-re.paganellus	paganellus	1	-0,0100234794244686	-0,00364802546933471	0,00597315289436384	-0,000926018541980596	-0,00227441156188673	-0,00958245303478128	-0,00710984250517455	-0,0123388431172594	-0,000423843254804605	0,000912478052913446	0,00271332873653754	0,00492069364696528	-0,00314735155246168	0,00234134189406424	-0,00391362472458115	-0,000814237579203302	0,000103772728781589	-0,00142044203664901	0,00109166463179564	-0,000364866761410344	-2.43045e+09	0,000712155618086775	0,000439259084777865	0	0,00754690584531606	-0,0877087891056351	0,0126402939025334	-0,0561800858475855	0,0137012529289241	-0,0169610545402967	0,00166889534746994	-0,0101803291509719	-0,00419768449460366	-0,0084839421890799	-0,000166761542018857	-0,00104257010826707	-0,000590791350002711	0,00256368900675199	-0,00492775409247678	0,00218983938628087	-0,00299550229060296	0,00129616513522176	-0,000313631380281569	-0,000484067017783882	0,000959613595889388	0,000767105444765067
	Gpag-5-re.paganellus	paganellus	1	0,04172943566736	0,000563901121009213	0,0152258178267214	-0,0097698970712545	-0,00273245843615469	0,000868576111041685	-0,00109003806898139	0,000367218354911563	0,000339538081935647	0,00163506980410553	-0,00220993757294827	0,00215919077004498	-0,00404776596354244	0,00199705267074764	-0,00268644390725486	0,000684723902418342	-0,00136065959222852	-0,000249399824031438	-0,00142213901336634	-9.08047e+08	-0,000372015605027566	-0,00101623668184659	0,000348644146134682	0	0,0111405387640413	-0,0538635499967426	0,0237073770882339	-0,0460766946705547	0,00790702958385797	-0,0184326014840547	-0,00362280667204098	-0,00314606997907175	-0,00158154470695686	-0,00170600620703291	0,00306459274505949	-0,00231980859327073	0,00139199073035363	-0,000109908235399126	-0,000698581650329998	-0,000309220843605379	-0,000289787396337463	0,000234023205517055	-0,000564689747025476	0,000580866945995241	-0,00105955242734971	0,0013063508716739
	Gpag-6-re.paganellus	paganellus	1	0,027384441791947	0,0455016869644102	0,00987295344897749	0,0218133204644093	0,00135683316203601	0,0166227453440575	0,00176801398947171	0,00726512892023894	0,00378332762211163	0,000446039987007683	0,00230759077004368	-0,0025078163455105	0,000758682806662627	-0,00230959213418201	0,00198046677230365	-0,000844178594568084	0,00156779000377112	-0,000266141426324043	0,000226412496888597	0,00134671042940056	5.23663e+09	0,00061262420791164	-0,000820212757681121	0	0,0206281961573344	-0,0310498577783113	0,0200483914852146	-0,0386711346661223	0,00881244215148865	-0,014478740238289	-0,000562508765765444	0,000667210883634796	-0,00228319233250025	0,00370604341968555	-0,000709228774902708	0,00274802867443642	-0,00246164540055874	0,00311694083371484	-0,00246398512011958	-0,000120810173861606	-0,000237957911741526	-0,000795242027006538	0,0019475341416733	-0,000680764054012871	0,00159170465632545	-0,00115229131563325
	Gpag-7-re.paganellus	paganellus	1	0,0184822730362635	0,0465079736066392	-0,00925913484783624	0,0325976427970383	-0,00840904784076895	0,0147956385419319	0,000986477734748333	0,00218389030791847	-0,00258560174386996	0,00393807952781403	-0,0027285901664683	0,002017600949726	-0,000216523965355376	0,000985128609430685	-0,000938780616013724	0,00291537119254424	-0,000934882488384791	0,00261408100443335	-0,000102938209613895	0,000477308086777043	0,00127727805309401	1.21418e+08	0,00226700042497781	0	0,0226872551716985	-0,0438197994797187	0,0140929102165038	-0,0308715104007905	-0,00143208342669503	-0,00650711598336222	-0,00558699625637171	0,00155432403001092	-0,00305877102886861	0,00186524622315128	-0,00268022653635914	0,00107078619015659	-0,000861601411248028	-0,00183513619294076	0,0036906418855152	-0,00304443844303779	0,00565709763287906	-0,00175284582595006	0,00220084468564211	-0,00178378825193079	0,000114146575409635	-0,00221302978175027
	Gpag-8-re.paganellus	paganellus	1	0,015635055621467	0,0353652277592467	0,00694797662975688	0,0165607665273177	-0,00236381953623003	0,0140729726502257	0,0051603261108272	0,00397733045160025	0,00342699442764197	-0,00101334394801196	0,00240482005797996	0,00188530264410134	0,00161926473818477	0,0012012751608497	0,000550045542721646	0,00139549060057512	0,00124820644140056	0,000479184962002849	0,000255630291206278	-0,00124637923307443	0,000857436095811683	0,000157472768272215	-0,000589920667457644	0	0,0124828003082474	-0,0561006221162575	0,0226977984289537	-0,0485856830102241	0,00389948974755383	-0,0216392296284903	-0,00304767904008251	-0,00052532565218733	-0,000844296765659309	0,00064706680581499	-0,00193896443591531	0,00133542054317725	-0,00236597347002617	0,00238868299626558	-0,00366041637927587	0,00116603007818885	-0,00267564763216209	0,00165817019670461	-0,000737824862423628	0,000119369961602922	0,000858071045819062	-0,00023423478749649
	Gpag-9-re.paganellus	paganellus	1	0,0239595559310836	0,0339165633149232	-0,0207083002929696	-2.2324e+09	-0,0113905390108236	-0,00189440629423261	-0,0147360924224596	-0,00259749481333263	-0,000260880677835552	-0,0020016536784556	0,00225526279620651	-0,00240588211519264	5.15406e+09	-0,00360927981209956	0,000299829530535214	-0,00171957121511352	0,0017857349459795	0,000688013103760309	-0,000728566711577428	-0,00160670805884744	0,000738283195679562	-0,000978721882403936	0,00092833315298055	0	-0,0255311130184124	-0,0482128697097243	0,0186808916926159	-0,0573080578895127	0,00606502945424813	-0,015829294416817	-0,00539521745562345	-0,00781241673795809	-0,00348626615918429	0,00114923262049641	-0,00179797826672528	0,00533953284954702	0,00110490534259632	0,00167888888684668	-0,000199766407142354	0,000796225922597573	-0,00164447885174526	0,000907731246300363	0,000539288839103273	0,000191122494042239	-0,000659911478368287	-0,000236885400398519
	Gpag Faro 2013 10l.paganellus	paganellus	1	0,0303514974042124	0,0513523831624317	-0,0159155766517689	0,0171207785856844	-0,0164901534880366	0,014610364993003	-0,00971597403788419	0,00282842326346548	0,00434546481494986	-0,000354566249562697	0,00136132673629339	-0,00062715718458635	0,00106983420077607	-0,00131438779011156	0,00303366890084049	-0,00258845162167177	0,00117071233772566	-0,00316188261796177	0,000948362987293692	-0,00206820635438348	-0,00308300837221228	-3.45063e+08	0,000180667386915148	0	-0,0205240552715098	-0,0512185369984524	0,0247759899992655	-0,0485015786307722	0,000580262105777586	-0,0152801289959857	-0,00349896018540557	-0,00843175055071518	-0,00176584963831244	-0,00226217659144556	-0,000767039436720873	-0,0013346860532524	-0,000376236630998094	0,000146988862466609	-0,00148338453801696	0,000311621126280629	-0,000320247711062028	-0,00297246364618411	0,00147193852131244	-0,000947284698424097	-0,000181348058038867	-0,00130079120178531
	Gpag Faro 2013 1l.paganellus	paganellus	1	0,0165854887073642	0,0184385822412392	0,007375834116136	0,00964541471989574	-0,00107483613860349	0,00895213503856659	0,000519719158893203	-0,00211460113523241	-0,000151815097991305	-0,00235476263006035	-0,00125254344961224	-0,000211208097877937	-0,00130212019874298	-0,0014715043294673	0,000317311915999002	-0,00272931235718294	-0,000129996681352494	-0,00170183764661079	0,000253684732479003	-0,00102168954425975	0,000863083255595624	-0,000790321617597737	0,000253610764482948	0	0,025524035566494	-0,0557422038007034	0,0186391418678691	-0,0529339707045756	0,00505529278187746	-0,0200916327943745	-0,00274975016186265	-0,00520717612568782	-0,00380843858653547	-0,00326458416039884	-0,0044216686147085	0,000693093486408253	-0,00288653184860176	0,00453630631665811	-0,00138597309254781	0,00249265868354134	-0,00167101807767174	0,000133355499233751	-0,00216170760550723	0,000112405685784962	-0,000654679239827261	-0,000528297379494955
	Gpag Faro 2013 2l.paganellus	paganellus	1	0,0446132611514583	0,014100420132786	0,0256814174248715	-0,00587150264553027	0,0106368191351738	-0,000404804123478022	0,00901981490413366	-0,00206769618922578	0,00375862391219603	-0,000247637819201771	-0,00131724155186965	0,0036934352676422	-0,00364737353852529	0,00292749032002506	-0,00222993077180884	0,00252960277131379	-0,00062397977397071	0,00304006821718581	-0,000723397200426023	0,00223006536742973	0,0010917678736085	0,000844425399133854	0,00183410483012306	0	0,0237932444483696	-0,0562889845802318	0,0270154874450232	-0,0522589170625654	0,00625588608936961	-0,020818070894282	-0,00285316576358724	-0,0073487994328341	-0,000951254837027044	-0,00260635564911546	-0,000408592444914232	-0,000855914268985761	-0,00210689953461614	0,000173037980861979	-3.80181e+09	-0,000534439743192517	0,000155401244221931	-0,00227250176269576	-0,00152823060851882	-0,00226898983767913	-0,00142258926104917	-0,000660422366822908
	Gpag Faro 2013 4l.paganellus	paganellus	1	0,0107700078418266	0,0208628912416623	0,00972885003546628	0,0103642830244349	0,00389376913001354	0,00058775064022413	0,0055688223924389	0,00103219383297574	0,0106578741289738	0,00576983487222981	0,00358837757786405	0,0011330852613689	-0,00246060450911879	0,00210602484100342	-0,000320236747141988	0,0055496572311228	0,00235412588116632	0,00297549163755082	-3.87554e+09	0,000273452394341401	-8.36978e+09	-0,00307398197283036	-0,000318079988785534	0	0,0199427583804533	-0,0798004688651874	0,0161351779477826	-0,0506269405059452	0,0109175347420136	-0,0198031149846138	-0,00438496572055935	-0,00824504610461603	-0,000305605483532777	-0,00174186185266897	0,00476424819074146	0,00108782671461375	-0,000969411440735491	-0,00161469319359636	-0,00344601764847495	0,000351044615341653	-0,000155997872911369	0,00198362475783299	-0,00066828090721941	0,00259248499050436	-0,00295849015149824	0,000503060712519434
	Gpag Faro 2013 5l.paganellus	paganellus	1	0,0381152002680123	0,00692609487433222	0,0131338997402367	-0,00396514641062102	-0,0001898204379733	0,00368680333164802	0,00125598456934376	0,000547645495829183	0,000503190957615488	0,000293056288911098	-0,00127375618958682	0,000814756395169725	-0,00262965309651572	0,00124668181403154	-0,00259380308965012	0,000334164010549364	-0,00167959311728448	0,000394198602171027	0,000111006625436053	-0,000952925243833458	0,000600502266901814	-0,00156076695418171	0,00049748601075876	0	0,00836037106804082	-0,0586708225983845	0,0195412966837385	-0,050343309373186	0,00955596196715441	-0,0231335117564667	0,00076908157324175	-0,00413145299162616	-0,00164105737911589	-0,00123738522727929	-0,000850501603164782	-0,000816060560901403	-5.39036e+09	-0,000943598389384675	0,000262208124007695	0,00121140111933381	-0,000979924805209639	0,000960266996754846	-0,000636620195325725	0,00172030280635663	0,000352788536515973	0,000817112846328987
	Gpag Faro 2013 6l.paganellus	paganellus	1	0,0245072629895439	0,0613224700152995	0,00226226267715537	0,0287382721139724	-0,000910347903022034	0,017920797048117	0,00354575064953326	0,00621701105809223	0,00387777974213969	-0,000741375904393014	0,00510999485748775	-0,00324558717609747	0,00235295175984489	-0,00180353339886113	0,000999174854227648	-0,00057242353744623	-0,000767147770864817	0,0010941116547609	-0,000919522671383447	0,00148959851840881	-0,00105164264149907	0,000397016635119199	-0,000282822755374632	0	0,0101652002189036	-0,0280810138164277	0,0199338557655139	-0,0309696216487414	0,0065296684492191	-0,00806327265439871	0,00147781099981869	0,000863170964913004	-8.36392e+09	0,00171587110369856	-0,000153824843964861	0,00302629162248902	0,00160174960499385	0,00180299814451335	0,00291116593834826	0,00012241370158339	0,0020501298489161	-0,000367574500270426	0,000916545736477411	0,00053471330396589	0,00107294739667297	0,000842603608313647
	Gpag Faro 2013 7l.paganellus	paganellus	1	-0,00739551885986527	0,0501145812756885	-0,0128956362468159	0,0291709290866363	-0,0134005399057496	0,00806649869266284	-0,0018942552427639	0,00060269662404853	0,00104495688222426	-0,00357183995597737	-0,000115518028229095	-0,00230314809278972	0,00525728874251772	-0,00343632966408605	0,00208634963858861	-0,00477136484472314	-0,00126208529277774	0,00070987249163018	-0,000913965540217988	-0,00141235355281033	-0,00131391065915645	-0,00309328926910339	0,000147688720337437	0	-0,00248162584043484	-0,057341887216512	0,00835343958104604	-0,0336862624378844	0,00117601043094406	-0,0144706587415537	-0,00358772344814659	-0,00475271654976648	0,00184028714421322	0,000794826507337505	-0,000363080733350037	-0,000211211456503447	0,00213328781307539	0,00163040849945343	0,00356369129183427	-0,00271581990982412	-0,000403114876103452	-0,00245547775200836	-8.06834e+09	0,0019742324885849	-0,000279368178250015	-0,000706592205864995
	Gpag Faro 2013 8l.paganellus	paganellus	1	0,0118258410167534	0,0344304861083496	0,00370444298009345	0,0213217338555531	0,000501688174227955	0,0132390470037952	0,00527479254874167	0,00112334862138737	0,00300629602840045	0,00117858770794847	0,000711184837645937	0,000146067730703775	0,00162800235592689	-0,00410882764429237	0,00211153549951642	-0,00296243040441766	-0,000119805052139604	0,000282321756097436	-0,000801966396882885	0,000747935514008645	0,000126867830552654	0,000174017205026509	-0,000195486507756535	0	0,0315512812737635	-0,0561985980233573	0,0242876540940889	-0,0470039620153988	0,00501650941430793	-0,0179855539821737	-0,00126353504852353	-0,00545484645423697	-0,0023336374559493	-0,00398700108225771	-0,00430734055740706	0,00170958521150604	-0,00453051988471121	0,00354062311149919	-0,00239304374956052	-1.00789e+09	-0,00163734342633979	-0,00265430379104429	-0,00306855816056248	-0,000805028062330299	-0,0018397349622319	-0,000275292106331167
	Gpag Faro 2013 9l.paganellus	paganellus	1	0,0132698178498045	0,0302967049621827	-0,00352065194772425	0,00940732407719209	-0,00815873968214319	0,00816499599542228	0,00092673721157795	0,00116812458895003	0,00330239355541818	-0,00326359946784963	0,00153833506862854	-0,00397995885244222	0,000896017976380362	-0,0018804421529208	0,0025861448639155	-0,000791045378995457	0,00426078845837017	-0,00148539484534347	0,00218251637842056	-9.42111e+09	0,00108314183143066	0,000447395969311809	-3.62771e+09	0	0,0193004854614916	-0,058212300621953	0,0212665105960979	-0,047940546686045	-0,000849066345983039	-0,018749095792333	-0,00692355285141181	-0,00437568521005633	-0,00535440737743035	-0,000410147839026996	-0,0022570731810004	0,000246806171462705	-0,00256484451280575	-0,000683632202781832	-0,00230435784991388	-0,00139974494994679	-0,00158838705720861	-0,000761978214410704	-0,00188146470742399	-0,000846799218407294	-0,00132929868366465	-0,00104190637425591
	Grou 1 L,Selce_OK.roulei	roulei	1	0,00729068260425344	0,0242585262475925	-0,0277684052406681	0,0053370131270533	-0,023169289088708	0,0124560565643664	-0,00434505938419205	-0,000563704742918883	0,00253943299690997	-0,000751402630146949	-0,00232851693872921	-8.44867e+09	-0,00342072591807151	0,00133424415825224	-0,00051972553283013	0,000209114863693345	0,000795552153598001	0,000149219985079617	-0,00030840997512124	-0,00166421287708463	0,000935657906253326	-0,00113930329453343	-0,000852305692958696	0	-0,0294346414135108	-0,0316114399564103	-0,00694314946689026	-0,0237015681159911	-0,0345501040764435	-0,00406886240175587	-0,0188697914733197	-0,00547164393455364	-0,00160980123382296	-0,00697822152197663	0,00292802780091224	-0,00161195400462151	-0,0020494128184371	0,000575418196168599	-0,00214193140154561	-0,00072712398862622	-0,0017946376510184	0,000396842563858033	0,00017120158776734	-0,00104262322892926	0,000262940613609755	0,0001065097974122
	Grou 2L,Selce,Okt14_OK.roulei	roulei	1	0,0350566462429783	0,00442214608822664	-0,0139829118084067	0,0110041049103337	-0,0221659021276068	0,0134270747658203	-0,00622611668943942	0,00196639948259067	0,00352788786931536	-0,00195324014001396	0,00352542446764646	-0,00239844336879557	0,00180895833393984	-0,00251931083638407	0,000651038681336765	-0,000988580596357455	0,000867991649833606	-0,00024189895769539	0,000713590884380095	0,000491649349617242	-0,000828770583968196	-0,000449510402563713	-0,00120098357084486	0	0,0101660892253298	-0,0411066608862922	0,00395370186603125	-0,0354213121110302	-0,00498933410454269	-0,0168988067392405	-0,00798913326196512	-0,00557616589077857	-0,00687438187416832	0,00081684153189268	-0,00315933667531585	0,000237743516402822	0,000639760140430181	-0,000414133990735763	0,0017505504053321	-0,000887665252804662	0,00214474930356293	-0,00098806059267265	0,00208377878190028	0,000504799186011117	0,00119214552321208	0,00126238556733891
	Grou 3L,Selce,Okt14_OK.roulei	roulei	1	0,01255391610294	0,0132733537402868	-0,0136125704242232	0,00356049456622037	-0,0200343734791686	0,00784404269743891	-0,00677561696233348	0,00219027625090189	0,00189506267090764	-0,000616863902743402	0,00113407030659833	-0,000862851199012719	-6.00796e+08	-0,0011455806829115	0,000216071938829072	-0,00139578686993503	0,000183843878840796	-0,000277028435202263	8.51392e+09	0,000312115689420466	-4.23937e+09	0,000451048856030262	-3.50043e+09	0	0,0185915466336322	-0,0361602869325498	0,0122091557352032	-0,0322484142934164	-0,00316021406326327	-0,0169725906762478	-0,00701509372844396	-0,00570785621426998	-0,00530900952232949	0,000109239241439578	-0,00393428744505194	0,00225640278162369	-0,00220615613710897	0,000902199335770805	0,000254839684610688	-0,000852531888394683	0,0013981547847009	-0,000990779918272024	0,000584273873754861	-0,000173245584788204	-6.87451e+09	0,000902303635980644
	Grou 4L,Selce,Okt14_OK.roulei	roulei	1	0,026214769428006	0,0246205550033136	-0,0179506411279003	0,0173861116082931	-0,0176783989868587	0,00909752274897098	0,00181485449314412	-0,00255845684143846	0,00674114229392822	-0,00233455976235691	0,00258075196790191	0,000631840211081371	-0,000694859819749867	0,00130850894510086	-0,00197786994659783	0,000618769701193622	-0,000814824974630039	-0,000392121568287807	7.05188e+09	-0,000441891140499968	-5.19649e+09	-0,000489967790611571	-0,000605863282101951	0	0,0156065548440513	-0,0382894173862615	-0,000456897594785176	-0,0236625455159358	-0,0170054066909491	-0,00908884217677025	-0,0117964439610187	-0,00660199767460905	-0,000984270151027945	-0,00568235068991157	0,00246789272356978	-0,00175246108493597	0,00245895023924633	0,00188833899964986	0,000327706526516955	0,00247167405605282	0,000626806312519746	0,00128921000964058	0,00142814309537851	0,000155677643319154	0,0015409779776097	0,000667456497548598
	Grou 5L,Selce,Okt14_OK.roulei	roulei	1	0,00633535448642882	0,0137234186234053	-0,0221713252890687	0,0100212364799505	-0,0240710761926854	0,00937606720485288	-0,00437739761432271	-0,00316669320098483	0,00126423958426108	-0,00390533792016674	0,0027222965079396	-0,000246872918862274	0,00230339922246993	0,00246598465786539	0,00149916536077784	0,00163953491102456	-0,00118600814997758	-0,000429522846056934	-0,00127349472276382	-0,000608218197924458	0,000390158582210562	0,000129592654162918	0,00131799098116631	0	0,00762038288075314	-0,0412560331085476	-0,00406963426070388	-0,0269193134869825	-0,0169039938403912	-0,0103993904971677	-0,0127672770489172	-0,00450981602729845	-0,00686499455435229	-0,00562511577057858	-0,00239352081863362	-0,00386347533664022	0,000288352596987601	-0,00136045661797555	0,00206275115948695	0,000600049270095801	0,00190625365754471	0,000308415352240703	-0,000289257603113368	-2.2379e+08	-0,00111114544805248	0,00112197981470389
	Grou 6L,Selce,Okt14_OK.roulei	roulei	1	0,0351535298863431	0,0288236018224638	-0,0132903351300674	0,0189091513600454	-0,0141488262170805	0,0126940361595493	0,00352114503888775	0,000640157867300433	0,00658595359633238	-0,00379149976917905	0,00236703480208595	-6.67109e+09	-0,00251500072846401	0,00297708372080492	-0,00290360205586377	0,000327547466696078	-0,000441132017478365	-0,00142815677331585	-0,000338224976482277	-6.73011e+08	-0,000834248315561935	0,000838019111699442	0,000228481315134386	0	0,00974802540719213	-0,0295728603657003	-0,00715393894710878	-0,0199582753174885	-0,0160586767871527	-0,00946050208333717	-0,00656454408651809	-0,00768861974403444	-0,000146652499363683	-0,00225738657743711	0,000303618312354898	0,000114859814285439	0,000333945634944875	0,000110848301051641	-0,000514185132019127	-0,000488783817619147	-0,000731167366034483	-0,000719568069786973	-0,00133739271117184	-0,000810617273215811	-0,00182727864982466	-0,000674513602684457
	Grou Selce May 2016 1-re.roulei	roulei	1	-0,000245857149505344	0,0304446571975999	-0,0206410808596175	0,00982520533993567	-0,0142024489606717	0,00746103716806185	-0,00257101441430308	0,00314815820161149	0,000994925231672356	-0,00111496610635848	0,000342861121295074	-0,00195961789723259	-0,00241177822944493	-0,00172821858169897	-0,00287746935065332	-0,000573377236430335	-0,000914831909910365	0,000236245314623654	0,000156692305368554	-0,000755521016868243	0,000687572334078205	-0,000983698289733288	-0,00018528848720459	0	0,0166989424134926	-0,0264131795456241	-0,00152669174513759	-0,0162075233322657	-0,0166642837371007	-0,00654219243255272	-0,0100708747416161	-0,00657341909461283	-0,000359299751845553	-0,00482402523541114	0,000993484078277772	-0,00224207906678064	-0,00127194064852386	-0,00127992121013625	-0,00132133129264213	0,000295598033235918	-0,00105733019513022	0,000366665343157075	-0,000659761251770308	0,000394674391240805	-0,000214466116020152	0,000577567111184485
	Grou Selce May 2016 1l gedreht.roulei	roulei	1	0,00134051528804514	0,0323691064791944	-0,0213246473806358	0,0170997704529944	-0,0152367979857795	0,00752502260632096	-0,00282938771970945	-0,00314843685959208	-0,000236767344997579	-0,00281776639805231	-0,00142118065779568	-0,000872666921441817	-0,00178585036741895	-0,00102417715622553	-0,00183505552520252	-0,00125962301098201	-0,000663019376182861	-0,000920647410982794	6.08181e+09	-0,00121432722981604	-5.61607e+09	-0,0009381695382662	-0,000959762311577518	0	0,0142049800195322	-0,0365129956074772	0,00130187753394879	-0,0220615535306831	-0,0110498643505523	-0,00720770773558348	-0,00606747615466054	-0,0063056772421957	0,00142522192945308	-0,00618984673081646	0,00283970389784506	-0,00259980205469711	9.78669e+09	0,000654328423911243	-0,00220490985223377	0,00130145438604588	-0,00232949342545774	0,000215434359162092	-0,00104787136174381	-0,000342319278430796	-0,000704350574023632	-0,000166149022546827
	Grou Selce May 2016 2-re.roulei	roulei	1	-0,0062574843788729	0,018513689229166	-0,0231512222781099	3.0394e+08	-0,0219075460393905	-8.82241e+09	-0,00641134927100015	-0,0022128455941029	0,00100036200265792	-0,00461982186550327	0,00180444980826983	-0,00583445792605617	5.01962e+09	-0,00335985221282875	-0,00153404383201032	-0,000331477954497336	-0,00170001959635221	0,000754508709319395	-0,00137565106648242	0,000818185224793362	-0,0010979704726258	-0,00015145670148652	0,000191940530089667	0	0,0148868493055896	-0,0296690856369539	0,00592446132126636	-0,0237976964916114	-0,00787500416135237	-0,0149592642109424	-0,00920262833807047	-0,00693345667349435	-0,00639169235623978	-0,00128932838997707	-0,00271251632446338	-0,000772839828133581	-0,00057597271416744	-0,00188530347171824	-0,000555098597689923	-0,001654551884226	-0,000796170160218942	-0,00141800990055354	-0,000744999355816112	-0,000970381307223169	-0,000501868702930872	0,000590935451691537
	Grou Selce May 2016 2l gedreht.roulei	roulei	1	0,0141886426195019	0,0409037389967524	-0,0118362049987841	0,0166174050436128	-0,00857395470886255	0,010229234953876	0,00255506110728733	0,00170171231582507	0,00719834545365995	-0,00184183925809573	0,00450678442516924	-0,000751537240207472	0,000474109727968715	0,00185402836257362	-0,00107992421998775	0,00333759800513908	-0,000784978829565524	0,0018120038100088	-0,00104572515847108	0,000679404366409339	-0,000700415677910514	0,000121129926674927	0,000353803438725333	0	0,0239478355807286	-0,0377468283462717	0,000628390702971803	-0,0245472450871609	-0,0115430507839859	-0,011317033535077	-0,00762004996806978	-0,00500135818209521	-0,0025752472474218	-0,00175106435917247	-0,000330544218760531	-0,000961836558371222	-0,000206847675253016	-0,00136780111633733	-0,000643766347737796	0,000719844593863084	-0,000485212075481633	0,00106711766500141	0,00104245472314755	0,000421419703748095	0,00025762290672719	-0,000390058970278783
	Grou Selce May 2016 3-re.roulei	roulei	1	0,015360658545599	0,0285347774050389	-0,0252475147353977	0,0171432396994653	-0,0144953448606859	0,00732411392947147	0,00443567488970745	0,00262409892354585	0,00763519557362437	0,00221684269090056	0,00438922908709302	0,00123368890073324	0,00166752660273131	4.40765e+08	0,00233362081822609	-0,00172254210954148	0,00245017998152086	-0,00136177268296352	0,000155977184478689	-0,000193088568758469	-0,00167865172692042	-0,000121417669754549	-0,0020578814050532	0	0,0156161256518745	-0,0349787456266028	-0,017350774779	-0,0135205616879943	-0,0324370038618005	-0,00786467096188129	-0,0106930256375234	-0,0135398239697309	0,00417000129994438	-0,00980702506534215	0,00276210837217467	-0,00267730936971874	-0,000878997244030774	-0,000572275967891247	-0,000467750029016479	-0,00277619401863096	0,000793985075403005	-0,00263231533879884	-0,000561423876936323	-0,000694990270770061	-0,00124039220878075	-0,000574849375347578
	Grou Selce May 2016 3l gedreht.roulei	roulei	1	0,00366205311984829	0,0407379052416742	-0,0151507602046591	0,0205635140606293	-0,000647126935071659	0,0124014595813899	0,00697010585981845	0,00900136306767367	0,00118086100974091	0,00482423004867326	-0,000528627410571829	-0,0011230973929959	0,00209734535147541	-0,00358133635987244	0,00366030391670064	-0,00121903330844625	0,00129081607644835	0,00105473865256322	0,00062527722906527	0,000344746009081788	0,000399956977616473	0,00050745308156155	0,000536683044659566	0	0,00850818724857779	-0,026932107951623	-0,0250696414006161	-0,00997063200011491	-0,0297379470887748	-0,00356091616153296	-0,00563021571323101	-0,00924012747612766	0,00564177759757828	-0,00539732080987335	0,0022606768299672	-0,00206457411668409	-4.48477e+09	-0,00142483356604654	-0,000652851665051618	-0,00157506074015744	0,000426858840670966	-0,000796518489186681	5.70122e+09	-0,000838990655060077	-0,000433363655348188	-0,00179617547264696
	Grou Selce May 2016 4-re.roulei	roulei	1	0,00759699931527428	0,0327406939153412	-0,0170874980078621	0,0171852149194759	-0,0165684200415861	0,0101862121904606	-0,00433626558303721	-0,00115024584231006	0,00085417868798165	-0,00490626098471044	-0,000876648217826055	-0,00289820752861244	-0,00229245472963028	-0,00214492836292321	-0,00296032313275674	-0,00160459350521357	-0,00317992236761031	-0,000551705777855687	-0,00294924117165263	-0,000940585585798565	-0,00154290858892112	-0,00167890246215293	-0,000426141006097414	0	0,00899798245050117	-0,0290687064820289	-0,00625904453986768	-0,0213616600163204	-0,018511535260933	-0,00451311521336471	-0,00973798264941415	-0,00111005489341339	0,000583136593091959	-0,00178414088498737	0,0033019174758423	-0,00138218612280278	0,00269641905921356	0,000858845759086311	0,000708474113554369	0,00296560665377082	-0,000387950949477297	0,00187420456324213	-0,000787673320317533	0,000140650349990654	0,000161011553297661	-0,000918476610547077
	Grou Selce May 2016 4l gedreht.roulei	roulei	1	0,00756160819521592	0,0380203701672267	-0,0152065467216096	0,0137317684368145	-0,0119764612790044	0,00834478012227599	-0,000403969677567732	0,000221984469363963	0,00161727620306228	-0,00209315923492707	0,000467252382460918	0,000248564536848144	0,00152462775421766	0,00158705765164351	0,000689760112492078	0,00173042688464884	-0,00147946907582594	0,000657965587478471	-0,00247213032012058	-0,0011916780955136	-0,000568498722063125	-0,00249624448013984	-0,000385684565747258	0	0,0147953674213903	-0,0317847584274012	-0,00371085094424606	-0,0206735880675217	-0,0124720665470585	-0,00779039585562436	-0,00804113319420129	-0,00252949758622681	-0,000997128632993847	-0,00268218169897112	0,0030256356954371	-0,00282563520942358	0,00309664742899665	9.52141e+09	0,00149566305992287	0,00271344866200265	0,000844409730409242	0,00136098953466949	0,00128653698932404	-6.24381e+09	-0,000118004193454738	-0,000909639891392566
	Grou Selce Oct 2014 1r.roulei	roulei	1	0,00189496455197816	0,029267736194367	-0,0117615485752528	0,0292435527361146	-0,00763833063742586	0,0205853515493519	0,000425450095208957	0,00188254820207443	0,00123687014776831	-0,00197994896373683	-0,000635313407288241	0,00186606458780844	-0,00173353901151008	0,00242169691135195	-0,00254951806008204	0,000712633013758054	-0,00201305016936748	-0,00082507286620786	0,000128285198867091	-0,00102542068863337	0,000450808605124942	0,000407746372974197	-0,000641969840240387	0	0,0023795484610106	-0,0466679851912258	-0,0129250321212833	-0,0223875980610298	-0,0230761488271215	0,00140340217963737	-0,0113989846786644	0,00248780406963587	-0,000652823847719839	-0,00274601247981475	0,00176819450712043	-0,00202220882555937	0,000809705764411005	0,0021709455006008	-0,000956859730174867	0,00189549508611562	-0,00274079299103898	-0,000656844083925723	-0,00147048043164623	-0,00174456500275343	0,000629607311405595	-6.16216e+09
	Grou Selce Oct 2014 2r.roulei	roulei	1	0,0261882202396413	0,0176940863279826	-0,01257362338796	0,0194710849509703	-0,0161466640428294	0,0175602266590143	-0,000100671195117271	0,00654416848932597	0,00519940615566414	-0,000292776332263845	0,00315122107021098	-0,00336940988019371	0,0015820399331863	-0,00184792745306061	0,000246797877861865	0,00098991235266722	0,000754338275207572	7.08997e+09	-4.13546e+09	-0,00016515129699144	-0,00169030205233317	-0,000294418106180409	-0,00117911253013944	0	0,0124143012021783	-0,0513936615994314	0,010999574772716	-0,0403754320035858	-0,00313953636417017	-0,0186774563589923	-0,00692067509288302	-0,00670003108028838	-0,00527617034330983	-0,000522064681887734	-0,00310605459743322	0,000170166541666099	0,000481722395351501	-0,000718996258181377	0,00117590070446756	-0,000720212386384498	0,000522844900033271	-0,000197417553521238	-0,000241013091499397	-0,000539691551919811	-0,00139030533364517	-0,000257766094965231
	Grou Selce Oct 2014 3r.roulei	roulei	1	0,00318235385569479	0,0137886468069776	-0,0132804124909588	0,00515617036440451	-0,0164354571817615	0,00782879938473741	-0,00180045993823324	0,000526680345588307	0,00699151560156057	-0,0018578073231581	0,00463318780966365	-0,00168313769843292	0,00086353685669545	-0,000544985816261377	-0,00120113216476905	0,000764422802410654	-0,00182422220090708	0,00191843255304086	-0,000939068028926323	0,000882862976270024	-0,000471017952935385	-0,000170874366152733	-0,000309254657320042	0	0,0119543032032442	-0,0369848769744663	0,0093249819199343	-0,0286140180564643	-0,0067255044714841	-0,0122549176605909	-0,0082796585437441	-0,00454001366878282	-0,00314109955249261	-0,00137000370215561	-0,00114158166426334	-0,000283408785558523	-0,000802420181497536	-0,000516699341893596	-0,000565361906433133	-0,000228193680739125	-0,000124804448989711	0,000625279039816487	-5.38673e+09	0,000423113413090962	0,00074424631221767	0,000998654755750574
	Grou Selce Oct 2014 4r.roulei	roulei	1	0,00179332870098161	0,0247467061347761	-0,0126238621349954	0,00747349438651441	-0,0189425779610251	0,00782187018045682	-0,00508978922107149	-0,00291979031858867	0,00330073164895324	-0,00191432856024016	0,00393654473520625	-0,000304491110976254	0,00176192231026091	0,00188498105219351	5.3691e+09	0,00165922686539775	0,000218685644695417	0,000998189680832713	0,00103054593059602	-2.01565e+08	0,000755531845205424	0,0011080062566078	-5.49954e+08	0	-0,00552935333290813	-0,0421815686725262	0,00420927891580694	-0,0252092560465459	-0,00961301282017983	-0,00772142180364249	-0,0110330964699446	-0,00328593533742997	-0,00687556496747014	-0,00193113785923949	-0,00126189175837435	-0,00068249931707584	0,000830964391701626	-0,00154709434939078	0,00191467160640285	-0,00101500550302352	0,000573370087240821	0,000125962602676175	0,000423247692297259	0,000867118057167964	0,000199809251302583	0,000449048285277273
	Grou Selce Oct 2014 5r.roulei	roulei	1	0,000132729423995567	0,0179372582910095	-0,0187953061237773	0,0077943374052061	-0,0209860296928129	0,00644086188210462	-0,00724798058788315	3.4498e+09	0,0034207202620106	-0,00207481628479061	0,00288502177128448	-0,00052241966310919	0,00211312655135697	0,000888490426573593	-0,00127469391828264	0,00240196265066135	-0,00188441363134101	0,00143520466319755	-0,00107054821107995	0,00233231522865721	-0,000384607968981898	0,000767383323761758	0,000988150681874098	0	-0,000484291035172837	-0,0450172357591202	0,000434115042405703	-0,02720300771216	-0,0121454963628806	-0,00785364063268099	-0,0103946079265785	-0,00518700855250678	-0,00577558411401967	0,00207346694312934	-0,00353013739616877	0,00257565878173732	0,000830437524440259	0,000184157648377094	0,00238598164108017	-0,00238749864887798	0,00187722212312148	-0,00261022347168868	-0,001023519059672	-0,00115871362014997	-0,000499793149668518	-0,000254046112855523
	Grou Selce Oct 2014 6r.roulei	roulei	1	0,00648045246663953	0,0333609602790557	-0,0121620610829365	0,0234087041177968	-0,0110998954934067	0,0193787428946573	-0,00136252751512552	0,00648144492178854	0,00525776038079185	0,000793496775123186	0,00464989245580822	0,000495235619249572	0,00193376129158503	0,00105914014480149	6.72926e+09	0,00065479081689675	-0,000230303667541838	0,000523997571767442	0,000206836295062879	0,000979393288821081	0,0012745169474722	0,000574036102130325	0,0019459961147807	0	0,00562195238925774	-0,0286123413572205	-0,0112900127207207	-0,0169586023184395	-0,0164039793797309	0,000435655370642212	-0,00834078537685019	0,000450995720324463	0,00101907866630184	-0,00367355184443936	0,00370992385141564	-0,00351584802760829	0,00221470634279634	0,000500836264705253	-0,000322892577497355	0,00140321873115714	-0,000986837903572136	0,000604072904523215	-0,000362998436279265	0,000136347637693908	0,000637234967730307	-0,000458620733114526
	Gvit-1-re.vittatus	vittatus	1	0,000429753449226273	0,0577577668749467	-0,00758207125202116	0,0461920122912415	0,00207806279958438	0,0150546315451011	0,00661048910997344	-0,000316063244871352	0,00489650856628817	0,00123160857627554	-0,0014443703102721	0,00314998492904891	-0,000836225841496402	0,000381492459432386	0,00260004510317563	-0,00138027504828715	0,00208673141256237	0,000395656645708195	-1.10467e+09	0,000128396462133447	-0,000140694273334067	-0,000642414108956735	9.98171e+09	0	-0,000436641018853967	-0,0131838494666758	-0,0137970902861908	0,00439766632456188	-0,00873910299878525	0,00976549905452746	0,00322862666207987	0,00289332790945378	0,00181171856577108	0,000854581582216352	-0,00169226817235427	0,00148379085142411	-0,00384159484442942	0,000106348897091633	-0,000278842144640963	-0,00100921772797117	0,00119603970352845	-0,000311886338196501	0,000488439366072338	0,00100489946243076	-0,000506366105812505	-0,000245923008781103
	Gvit-2-re.vittatus	vittatus	1	0,0141027796672905	0,0362470864280899	-0,0175365711133024	0,0393413065785056	-0,00951278461111114	0,022628249366276	-0,00201570596006133	0,00383397683271352	-0,00244096327384247	-0,00637336367298656	0,00104759971380339	-0,00171068538987455	-0,00104736869096757	0,00509339693765641	-0,00111635264115003	0,000724537722558704	0,00191974461820122	-0,00102406481266446	0,00023777333678524	0,000952183089460353	-0,000419855351581781	0,000934964569228012	0,00115522136919446	0	0,00499536202454065	-0,0295892266694566	-0,0141085515925406	-0,0106116770380232	-0,0197009714544231	0,00901600242383679	-0,00529060201685615	0,00235841087109936	-0,00103258984251448	-0,00518210130014388	-0,00445181911822776	-0,00459284688729282	-0,00459676172398126	-0,00160650477357215	-0,00308481384446361	0,000644764879109975	-0,00156444450454184	-0,000708659833867166	-0,000511731112375994	-0,00154740344749834	-0,000940203634813671	-0,000562654667617212
	Gvit-3-R,selce_OK.vittatus	vittatus	1	-0,00372856504467586	0,0456202804615226	-0,013439387891553	0,00751780452238124	-0,00519264381825055	-0,0110622088891832	0,00386148835546642	-0,00430149646207754	-0,000247241670593272	-0,0010565916311061	0,000972864955554024	-0,000395045882004475	0,00276848356886613	3.748e+09	-6.16441e+08	0,00063309807073684	-0,000182543141578773	-0,000252861333683651	-0,000467606021769444	0,000287294974730902	1.15898e+09	-0,000222916877580647	0,000163415590881181	0	0,00466175306135397	0,0183627323164129	0,0156882563699444	0,0258439568088507	-0,00407618514426233	0,00267074711979927	-0,000847981593555835	-0,00284618186028839	0,000379544692313127	0,000312649792430115	-0,00167218283778541	6.84315e+09	0,000810202645085327	0,000942958079255545	0,000867468852295968	0,000513113645766754	0,000540439363246014	0,000454817566063248	0,000275682814240141	-8.83437e+09	0,000352581817616708	-0,000373511312432713
	Gvit-4-R,selce_OK.vittatus	vittatus	1	-0,00824020366234843	0,0553208218435733	0,0127520285075306	0,0367278788540411	0,000283641452261798	0,00677867172799426	-0,0077464278542435	0,00214027483155333	-0,00197159419679018	0,000409477353032628	-0,000609482067775786	-0,00126938643001724	-0,00161355261328375	-0,00175486892836331	-0,00228489344759002	-0,00119231472655858	-0,00206911416764594	0,000730381946872468	-0,00119575204904261	0,000147028658299736	-0,000218166410765922	-0,000690528759649605	0,000123088989805049	0	-0,00335167769634004	-0,00894296081703639	0,0106127973018182	0,0101729694732563	0,00918544642818721	0,0129087263585323	-0,00122889452835735	0,00462997315667332	-0,00439521171416599	0,00472780695901035	0,000366864594880727	0,00303503317671677	0,000706954820522808	0,000535234581820108	0,0003203199497823	-0,00157406067571778	0,000668779412065102	-0,000650812457880462	0,000486046568529445	0,00137392256610661	-0,000780936941731198	0,000625311334558135
	Gvit-5-R,selce_OK.vittatus	vittatus	1	0,000877496492464611	0,052829026529992	-0,00536609267147653	0,0386623358451612	0,00221252408334211	0,0156303921646785	0,00409308376307668	0,000255739348444207	0,000933961861704297	-0,000146102493149015	0,000251137207471748	0,00254796342561959	8.17323e+08	0,0019102071443589	0,000449253816320165	0,00115271310354063	0,000742653239163344	0,000706137399022336	0,000594930385361709	0,00101676914888075	0,00119298811070029	0,000837021483980989	0,000571271402342951	0	0,0070295160558441	-0,02958052202079	-0,00125630592044777	-0,00853701336106492	-0,0124468847729979	0,00572132773920683	-0,00226570323040265	-0,0012727543141088	0,00122505381344031	-0,003904978523674	-0,00298386930533241	-0,00228964992268791	-0,00236956469427847	-0,000204050970418244	-0,00231034314463732	0,000784356781546714	-0,00202158263107534	0,000154839203825315	-0,00168547491851687	0,00056388895126739	-0,000580524372393446	0,000772040604338299
	Gvit-6-R,selce_OK.vittatus	vittatus	1	-0,0142598545036196	0,0302468727531475	-0,00457921333626477	0,00680298261169085	-0,000774754262910312	-0,013577954999455	-0,00249369600903359	-0,00727284141647605	-0,00218961126806486	-0,00189652109081251	0,000464082491545936	0,00275734283876506	0,00240113216162655	0,000361005904840108	-0,00131117573534126	-0,000855691407672605	4.59439e+09	0,000430722684217673	0,00124380960343891	-3.75904e+09	-0,000373854474361877	-0,000827511146596981	-0,000279450786916668	0	0,0095912711464774	0,0261181128329301	0,0179506058483041	0,0256236613589871	-0,00154680576205286	0,00765340939004755	-0,00493350069766988	0,000452672129636884	0,00258429623681177	0,00108301481459416	0,000709046679492918	0,000288608642676474	-5.26393e+09	5.58838e+09	0,00136616728662166	-0,000190650677160636	0,00194500243912727	0,00121161002918865	0,00124712585542034	0,00126150597251022	-8.77795e+09	-0,000467055097908238
	Gvit-7-R,selce_OK.vittatus	vittatus	1	0,00352247744486116	0,0564042321481081	-0,0204291910038871	0,0444784856495517	-0,00173012051651803	0,0126824232650459	0,00767121404202927	0,00233718620081495	-0,000765129057838583	0,00474169688863479	-0,00317965941097487	0,00204207994595093	-0,000291762599651269	-0,000102475803571744	0,00019932277333125	0,000999307056455849	-0,000867781282245253	0,00141531404356448	0,000434394914050083	3.24255e+09	0,00138111232429352	-0,000133739863105352	0,000542042953663072	0	-0,00392889016044187	-0,0308206426920998	-0,0123605330209809	-0,0126525913878115	-0,0132281285355378	0,00258007715975694	-0,0022593589939429	0,000209044610647246	0,000691590037847849	-0,000872259912134362	-0,00148233878485499	-0,0019555063621638	-0,00105442529985583	-0,000815757987163268	-0,00212216629940721	8.04276e+09	-0,00134357214495151	-0,000640834648134406	4.61565e+09	0,000484232253783043	-0,000908787230655667	0,00105696605615994
	Gvit-Selce-May17-no1r.vittatus	vittatus	1	0,01575502459228	0,0488030651799567	-0,00778954547665318	0,0410188012378248	-0,0100502622544973	0,021902317431076	0,00350104195804987	0,00107467885588801	0,00356822030868533	-0,00122074289126538	-0,00094928448972355	0,000826551076210583	-0,00168729386673219	0,00162932491497253	0,000723512067375551	0,0018853883045466	0,00111487211801964	0,000799318408084201	0,000728545110406371	0,000904973521050394	0,000275267941313038	-0,000176469826327508	-0,000156183586086051	0	0,0103242043642362	-0,041580979103675	0,00592046597285061	-0,0227013719016843	-0,00211888798884949	-0,00265293136754692	0,00352965277467383	-0,0028990841238284	0,00502490263642169	-0,00468370374616873	0,00186719828447707	-0,00219289591402358	5.31006e+09	-0,0025841257611424	-0,00147837730874146	-0,00136616448536948	-0,00158061345797199	0,000676597884506862	-0,000905623882059226	0,00170777875725819	4.09574e+09	0,00104646259723615
	Gvit-Selce-May17-no2r.vittatus	vittatus	1	0,00964054860341892	0,0542979655483486	-0,00885209332299674	0,0415550493143659	-0,00436044260410863	0,020475780716872	0,00105493003170556	0,00459084756595538	-0,000285630775282456	0,00112446408092755	-0,000542439915440203	0,000310508073629704	-0,00188260293727711	0,00202341179788674	-0,00202056450181835	0,00249612322142256	-0,00105934089752403	0,00190063110264111	-0,00100740751462956	0,00109203527027111	-0,000530383644943106	0,000176158069264946	-0,000200998013182996	0	0,00832556993297966	-0,0312095172665899	-0,00925153736689135	-0,0110644525674131	-0,0131209464012659	0,00422740507908435	-0,00179272337211438	-0,000318141986246021	0,000149821637807792	-0,00248124040207062	-0,00154186042749813	-0,00220738706990019	-0,00152645038813394	-0,00166769165391003	-0,00255875731567644	-0,000813356889129407	-0,000910265974389024	-0,000447447811899174	0,000350656929722572	0,000162066505735562	-0,000416908250892765	0,000565289243598762
	Gvit 2 L,selce_OK.vittatus	vittatus	1	0,0106854994511013	0,06177164367597	0,00564722648530428	0,0489847536572153	-0,00891806972700705	0,0120693099588971	-0,00452783154294554	0,00192898913547086	0,00356900176253902	0,00127487356741795	0,000869147708068447	0,000155916389261253	-0,00345080764519314	0,000582028182932046	-0,00224685414566166	-7.24232e+08	0,000116321498962869	-0,000450611736433524	0,000243839728493343	-0,0006322448908401	-0,000362472857017404	-0,000572522539365533	-0,000657487443900638	0	0,0150319003279063	-0,0194996501808342	0,00995669650658423	0,00676782612714848	0,00452704582487385	0,0163055195222522	0,00131916743037873	0,00461503326036486	-0,00385794779459409	0,00115495013010149	0,00182314871299255	-0,000143481342436415	0,00309882699153388	0,000831502751871834	-0,00137772168965233	0,00143473268026691	-0,00160990081298213	0,00138309740228068	0,000629047414432392	0,000206365161526437	0,000736862498616971	-0,000461316728583954
	Gvit 3 L,selce_OK.vittatus	vittatus	1	-0,00305907589723118	0,0521814401095512	-0,00561374324750234	0,0258831486533808	-0,00972241248045688	-0,00702853385055572	-0,000498383206179566	-0,00219289198734616	0,00112784054728606	0,000211977749433651	-0,00346828491758953	-0,00132486617893652	-0,000915307634388127	-0,000970339792101948	3.61283e+09	-0,00024960286161279	-0,000166412182259429	-0,000307947726209891	-0,000714206568128974	-0,00022991999838427	-0,000383726138529458	0,000206710906309983	2.83082e+09	0	0,011297228953397	-0,0144822475240499	0,0205861037411754	0,0221615668442716	0,00192376552206654	0,0129150485989445	-0,00426882192362877	-0,00121399946770367	0,00219138415789276	-0,00257159978323781	-0,000616794308232111	-0,00141192979560473	-0,00408766381653084	-0,00169457061347412	-0,00185868590643304	-0,00103399205229236	-0,000359540701466664	0,000225013546679543	-0,000415978430112156	6.41622e+09	-0,00029056572652824	0,000623630112947693
	Gvit 4 L,selce_OK.vittatus	vittatus	1	0,00641375575789055	0,0384807059725272	0,0171533429612715	0,0452969404235013	-4.33451e+08	0,0114137376658095	-0,00652907835401779	-0,000184859241938751	0,00371163593599174	0,00199436221315462	0,00392418472831813	0,00233329151248846	-0,000596740954466695	0,00219921935926489	-0,00164456978733382	0,000495582535856059	0,000157727826754506	0,000251807740920433	0,000459196629433061	4.92107e+09	0,000582110414043423	-5.19505e+09	-0,000596562811509132	0	0,00993180638452856	-0,0407620291472474	0,00789698017252708	0,0064894975334525	0,00974618785406091	0,0186287739101419	-0,00113907221440465	0,00735074956014249	-0,00406867457478559	-0,000183330382925852	0,000538466001338207	0,000784482859145058	0,000961180478658526	0,000504740392771432	-0,000372848886463951	0,000359765084046598	-0,000461912593295604	-0,000483859511344651	-5.74885e+08	-2.07606e+08	0,000370482934538374	-0,000165478698052076
	Gvit 5 L,selce_OK.vittatus	vittatus	1	0,0164434864810033	0,0417963556412028	-0,00152010392097584	0,0374050440603759	0,007304966341473	0,0117000414129456	0,00916475078363483	-0,00158636484176289	0,00286648039303127	0,00128830936982379	-0,002653403906458	0,00224213354415106	0,00031751625765326	-0,000282981858002975	0,00281151573165187	-0,00140075916900561	0,00104002816329556	0,000290037036224	3.20139e+08	0,000588952925735609	0,00143574051263603	-0,000399614384036138	0,000888133867346326	0	-0,0102941751690536	-0,0213023192777994	-0,020893053512183	-0,00307029314326842	-0,0177127287393145	0,00596579882016194	-0,00631178667285135	0,00206367773386731	-0,00363553884226285	0,00154100934515223	-0,00289480860234977	-0,0020387976407958	-0,00155024483417071	-0,000680104807263399	-0,00137577340338664	0,000376261238916007	-0,000576661186941762	-0,00112544677716129	-2.69506e+09	-0,00107873198682412	-0,000272244578845991	0,000545461557042567
	Gvit 6 L,selce_OK.vittatus	vittatus	1	-0,0111881933789277	0,0292152053642611	-0,00659164567149655	0,00885274252302278	-0,00583683868794496	-0,00666518686907052	0,000982355453654236	-0,00453629211873043	6.72946e+09	-0,00126495453406002	-0,00210519581463607	0,000143273000191252	-0,00194101739632088	-0,00152322534944255	-0,00184174144572298	-0,00161818257874116	-0,000459661588680805	-0,000504385010310138	-0,000418516776691148	-0,000611226167023792	-0,000708376853512633	-0,000294422748207736	0,00028681862961522	0	0,0244802387456151	0,0133585538329456	0,0232846056648835	0,0224716618359326	-0,000817403005056046	0,00499108746271847	-0,00292167811620749	0,000146911534531645	0,00189606513452056	-0,00190519005636985	-0,000857622552629178	-0,000347050522379498	-0,000929025070836359	0,00133262537101217	0,000363354220196407	-0,000463050866538877	-0,000261767347646227	-0,000482141106538611	-0,000525708216570281	9.86812e+09	-0,000511366534924153	0,000263087907157336
	Gvit 7 L,selce_OK.vittatus	vittatus	1	0,00250928039210715	0,05285198169289	-0,0211832905780999	0,0377689146353726	-0,00376318939191634	0,017753658053453	0,00565338828931539	0,00577870392024986	-0,000357780015206104	0,00245707935500261	-0,00242974435177669	0,00105497295687015	-0,00139206104120028	0,00139253875056462	-0,00079379842710228	-0,000223859478338818	-0,000775671309157917	0,00132841823807416	-0,000580026630707417	0,000844115197423042	0,000662311779827203	-4.05212e+09	0,000141805035292727	0	0,0121779190437626	-0,0333421675920192	-0,00728322822924234	-0,0165075149374167	-0,0150113613828249	0,00182405517207217	-0,00439670278488832	0,000882367949105529	-0,00204651611871139	-0,000389137761140616	-0,00273471955316784	-0,000834511976490581	-0,000924523403066579	-0,00201963204013455	-0,00136957349332343	-0,000267473778039393	-0,00229432846808587	-0,000874639312261205	-0,00152313829302424	-0,00194434063976558	-0,00118271904714774	0,000156470756372165
	Gvit Krk 1l.vittatus	vittatus	1	0,00111772440833882	0,0609116788417371	-0,0149159862715304	0,0410326121839632	0,00490861589241587	0,01571538304155	0,0073974936440296	0,00452020060318752	0,00230448883736983	0,00228615992042002	-0,000420499010381876	0,00342666311577068	0,000837515274891812	0,00133218687290264	0,0026756674257369	0,000694015370570972	0,00141879182964853	0,00119153158374125	-0,000160812363967825	0,000141653513270663	-0,000117926973988622	-0,000782006485913556	0,0001385101903506	0	0,0178353535695123	-0,0253214285173111	-0,0135083550489848	-0,00939737787474729	-0,00850296320550273	0,000695945529890392	0,00425972689075323	0,00347580412455459	-0,00149397765232916	0,00185664360899773	-0,00233242672958526	-0,000199133085537285	-0,000811629556781854	-0,00122256579285726	-5.96257e+09	-0,000693350665213001	0,000323121864983612	0,000503021515469523	-0,000247936465683293	0,000794404260521994	-0,000333232649845497	1.28979e+09
	Gvit Krk 1re.vittatus	vittatus	1	0,000429753449226273	0,0577577668749467	-0,00758207125202116	0,0461920122912415	0,00207806279958438	0,0150546315451011	0,00661048910997344	-0,000316063244871352	0,00489650856628817	0,00123160857627554	-0,0014443703102721	0,00314998492904891	-0,000836225841496402	0,000381492459432386	0,00260004510317563	-0,00138027504828715	0,00208673141256237	0,000395656645708195	-1.10467e+09	0,000128396462133447	-0,000140694273334067	-0,000642414108956735	9.98171e+09	0	-0,000436641018853967	-0,0131838494666758	-0,0137970902861908	0,00439766632456188	-0,00873910299878525	0,00976549905452746	0,00322862666207987	0,00289332790945378	0,00181171856577108	0,000854581582216352	-0,00169226817235427	0,00148379085142411	-0,00384159484442942	0,000106348897091633	-0,000278842144640963	-0,00100921772797117	0,00119603970352845	-0,000311886338196501	0,000488439366072338	0,00100489946243076	-0,000506366105812505	-0,000245923008781103
	Gvit Krk 2l.vittatus	vittatus	1	0,0182601198058574	0,0467487115077401	-0,0151116596514497	0,0430652374186085	-0,00681712279973377	0,0237976108745997	0,00483495328176723	0,00437063048423339	0,00392058681097021	0,000554653354604748	0,000634662008123707	0,00224676007040755	0,000113477506229488	0,00341590675844649	0,000504759823662469	0,00247760368322318	0,000926748841700082	0,00127434552641478	0,000278987875370706	0,00105034333060143	0,000273254174422991	0,000607857081122566	-0,000103751206068788	0	0,0227042554283757	-0,0442502567088996	0,00349509265062127	-0,0214649465003714	-0,00756229955654154	0,0033550272562372	-0,000510495150453919	0,0038975029756876	0,00160504751195211	-0,00289180183529103	-0,000982430262071591	-0,00276503712506902	-0,000676910025551904	-0,00129000455264948	0,000321910583407051	-0,000414913824209086	6.48316e+09	-0,000564202609752644	8.07706e+09	-0,000278328179807537	-9.74532e+09	-0,000430376354851874
	Gvit Krk 2re.vittatus	vittatus	1	0,0176340306244805	0,0386369109704343	-0,0168218175320074	0,039628752348492	-0,00863660151540001	0,0224236188862865	-0,00102168336090425	0,00438724085302743	-0,00132632031927061	-0,00587652347912411	0,00142750251358738	-0,00120956108345478	-0,000959004953156227	0,0053023538254934	-0,000439587010085609	0,000779492617344466	0,00229179952001145	-0,000741953147446283	0,000258853398136732	0,00116216435099704	-0,000331100108257477	0,000921248109635526	0,00120668931862781	0	0,00583606790891213	-0,0277457719751585	-0,0133428276852946	-0,00919606095008353	-0,0198831758068921	0,0094531697900014	-0,00509219198105348	0,0024387474014195	-0,000408634960386591	-0,00493840938894817	-0,00403023598669897	-0,00445193420384451	-0,00461377412319031	-0,00144918845634804	-0,00320425449959902	0,000654794339043437	-0,00111210383183798	-0,000706450246620202	-0,000194433406176465	-0,00131495824412931	-0,000884263903965811	-0,000501176469413296
	Gvit Selce May17 no1l.vittatus	vittatus	1	0,0174634288319753	0,0626173079346072	-0,00849137431735219	0,0464659611150694	-0,00441697859497981	0,0203270674738412	0,0064662526106305	-0,00207367627819429	0,00600611998175548	-0,000611553102636774	0,00190542252449086	0,00259890554413092	0,000977505432939058	0,00258666689020794	0,000667131101754233	0,000281730934939189	0,00100102560034708	0,000617611172691116	-0,000103781140653398	1.42967e+09	-0,000525137709643736	-0,000258667998705578	-0,000455902193648155	0	0,026542869491547	-0,0349235202980638	0,00130552421206905	-0,014646483789714	-0,00128330282053646	0,00316140282835582	0,00487315686296792	-0,00100316563513565	0,00384876757196822	-0,00334039798791642	-0,00048166560533478	-0,000403395185641344	-0,000836355497515206	0,0010410275492718	-0,00122618075729718	0,00216705070226337	0,000256748885709394	0,00185198295608678	-0,000608735535291405	0,00163472801953195	-0,000486932497169731	0,000459797530376269
	Gvit Selce May17 no2l.vittatus	vittatus	1	0,00229677020835926	0,0544818426119175	-0,00910590455752926	0,0377564780821987	-0,00245575838553435	0,018073049380927	0,00513258088418154	0,00384960891761965	0,00236900173752805	0,000237394930607164	0,000435747482506313	0,000658782813939551	-0,00084386812153716	0,0029143852420199	-0,00108625359793447	0,00252131493058152	0,000396616378901332	0,0012218407228343	0,000791855037920174	0,000679115466403526	-0,000210467376821753	0,000375646908840783	-0,000511421124333161	0	0,0133161874552245	-0,0351287273822414	-0,00456182426446911	-0,0144370063813355	-0,00887816273516219	0,00456705636684786	-0,000144647659995139	0,00209462816014152	0,00145431339813699	0,000470701257353592	-0,000137807927199722	-0,00102320888658893	0,000471742467893123	-0,00146122838674838	-0,00152891277627581	-0,000172071213213445	-0,000941462757402455	2.14651e+07	0,000261161458992182	-6.36753e+08	0,000349211928079915	0,00059629636230309
[truncated: 49 more columns]

## Sheet: Suppl. Data 3b
Supplementary Table S3b. Fourier descriptors when the reduced dataset of Gobius was included in the Fourier shape analysis.
Specimen number	Species	A1	A2	A3	A4	A5	A6	A7	A8	A9	A10	A11	A12	A13	A14	A15	A16	A17	A18	A19	A20	A21	A22	A23	A24	B1	B2	B3	B4	B5	B6	B7	B8	B9	B10	B11	B12	B13	B14	B15	B16	B17	B18	B19	B20	B21	B22	B23	B24
Gau-1-re.auratus	auratus	1	0,0242159108770535	0,0559975094292594	-0,0133327903654268	0,0415686887866853	-0,00713271029955422	0,0164185335532963	0,0071366152055402	-0,00242182885077042	0,00402243446261399	5.88121e+09	-0,000931687951565287	0,00357265620474276	-0,000276783537079318	0,00138539386204542	0,00108854752972954	8.45305e+09	0,00102085808399615	0,00136974824332817	0,00103999900446321	0,00150416007253742	0,000349194842240269	0,00125434572360207	-0,000472646314906785	0	0,00296839393846912	-0,0315222704415941	-0,00872569930970701	-0,0206187781581044	-0,0105204022884229	-0,000851824623394211	-0,00392661052202916	-1.44949e+09	-0,000932695465344736	-0,00104618956746331	-6.74366e+09	-0,00162983557110344	0,00197227369524038	0,000191502573015292	-0,00127627487012793	0,00137533905927407	-0,00249199891631176	-0,000627073539073381	0,000119118188889462	-0,000646755157875775	0,000474708940483028	0,0014648536342708	6.08119e+09
Gau-2-re.auratus	auratus	1	0,0152842230136477	0,0529605436218415	-0,00927160507383666	0,0363468303386487	-0,00513575812124975	0,0169630787334508	0,0083562174302231	0,000787475297329159	0,00578358522869453	-0,000237826660547518	0,00044103986944898	0,000620017218929229	-0,00170739962658473	-0,000467255862808073	-0,00220358972334167	8.79036e+09	0,000245558389185898	0,000311136068428425	0,00155197867774423	0,000221867501946435	0,000933034276836699	6.92302e+09	0,000170284149302534	0	0,012028688713947	-0,0298014059437034	0,000900191648774533	-0,0211544435302451	-0,00690960586825397	-0,00096992289292039	-0,00314218569786697	0,00109605585453837	0,00204627569951118	-0,00129730052001601	0,0026819675406148	-0,0019824867230478	-0,00124250545955637	-0,000665847556865828	-0,00385455472542578	0,000600775411833896	-0,00200612723591614	-0,000182667749525753	0,000385215427726092	-7.65168e+09	0,00050571229973341	0,000226496831064646	3.56974e+08
Gau-3-R,selce_OK.auratus	auratus	1	0,0452932470358266	0,0671128533208177	-0,0199642346625568	0,0531481338375062	-0,00788721689114273	0,0201044086876795	0,0033702998492308	0,000382135238398821	0,00282240642887132	0,00110489848787461	-0,00165202226952976	0,000110180306750868	1.14939e+09	0,00213944232176347	-0,00146847002315003	0,00094984798633387	-0,000278889320135896	0,0003783197219816	0,00144054791894109	-0,000628389285371585	0,000146323029532124	-0,000858915376332998	-0,000476107076135559	0	-0,00131414075906359	-0,0593772242299934	0,0133079945782077	-0,023514978267708	-0,0129962328147173	0,00646204477677846	-0,00456156101532064	-5.62823e+08	-0,00175373215375657	0,000669001940236198	0,000245881485722829	-0,00328476981148344	-0,000708638049187477	-0,00155458655695528	0,000316847617968229	0,000863788766468712	-0,0015766894550468	0,00129088841639306	0,000107032866133535	0,000301862090551208	0,00121682167079909	-0,000701356073072439	0,00047207575748324
Gau-4-R,selce_OK.auratus	auratus	1	0,0107402309733785	0,0579174769103719	0,00361586500945367	0,0418767982331055	-0,0071427978750709	0,0124461084053815	0,000632448076464098	0,00220964050341759	0,00566240806905825	0,00170036190398158	0,00394272422130304	0,00331427022895378	-0,000401775998326126	0,00171860613422119	0,000335895118936885	0,00173756326850726	0,00127719499987475	0,000217631818992714	0,000549147183261531	-0,00115775031372907	0,000274795117146107	-0,000294729426973078	7.20734e+09	0	0,0032272193632159	-0,0400793388352828	0,00666568132807282	-0,00787642892473792	-0,000576843689310251	0,0102896472271387	-0,0031064929811785	-0,000177029266820653	-0,000702114674793303	-0,000407136987427347	0,001736387055846	0,001172575777967	0,000211881820268006	-0,000453120223435993	-0,00234689286477004	0,000322927410223176	-0,00237549346646777	0,000636411309960881	-6.59142e+09	-0,000250874656699309	0,000131946806782412	-0,000517274633933309	0,000103927391103574
Gau-5-R,selce_OK.auratus	auratus	1	0,0122542700484149	0,0568855687527405	-0,00297948221506091	0,0502429215015692	-0,00598212432676733	0,019906211276827	-0,000226246776929385	0,000409766591211673	0,00208504178589336	-0,00171948245975212	1.99036e+09	0,00120147490313201	-0,000445221215410776	0,00126036083067789	-0,000446918699049954	0,000418401255899578	-0,00152419181350565	-0,000367803005111515	0,000216842130064912	-0,00102807135350603	0,000551827430241937	-0,000245019140096237	-4.59104e+09	0	0,0299388719345282	-0,0509826693380257	0,0105384578340632	-0,0258751304201925	-0,00193358115059332	0,00191695135222352	-0,00261868931851118	0,00416467393236952	-3.90344e+09	-0,0026194377129021	0,00245211357083263	-0,00445355894634487	0,00110036155907196	-0,000848486342401949	0,0008099578606785	0,00121506006071645	0,00058021128778006	0,000469204064535834	0,000335740705695357	-0,000100573144291889	0,000751243049009358	-0,000171347671558849	0,000638705692039643
Gau-6-R,selce_OK.auratus	auratus	1	0,00408970625583985	0,0584276850448234	-0,00449873656360582	0,0377254997598985	-0,00382716524916773	0,0161543431910008	0,000753693481055773	-0,00280317726259746	-0,000466388094864584	-0,000304330806175096	0,00240911777075482	0,000536642696795275	0,00127414239722794	0,00223484488937667	-0,00179335372320727	0,0015386399211266	-0,00166457877940175	-6.58305e+09	-0,000687314251391809	-0,00104042811797957	0,00115266778510678	-0,000180891930527502	0,000234185677196075	0	-0,010740901754781	-0,0450207432127264	-0,00588403827094178	-0,0267562909697536	-0,00783087141486237	-0,00305685479592752	-0,00543497161725937	0,00178497164652375	-0,00605690636140219	-0,0015503752756336	-0,0017362615809269	-0,0041453382448795	-0,000642940647090227	-0,00181877499548701	0,000383615489049806	1.24003e+09	0,000185420062929784	0,000515282480582125	-0,00122468192779623	-0,000109742704868206	-0,000708808444560138	-0,000269363906211696	0,00028854482748508
Gau-7-R,selce_OK.auratus	auratus	1	0,0170474039817368	0,0547371511550449	-0,00613739734252799	0,0369850165301135	-0,000392442714066155	0,0253498497428226	0,00283538912560572	0,00573798272174121	-0,00128092250239594	-0,00163868890351825	0,00121135947232125	-0,00151218215608508	0,00156829523064662	0,00126214449566862	-0,00096336812963091	0,00123854844104779	-0,00196003492291582	-9.90564e+07	-0,00158434769973563	0,000979705007750235	0,00119501674358272	-0,000470153125105985	-0,000106960789576345	0	0,0164370430447103	-0,0567244291213982	0,00774375185912733	-0,0342783111936816	0,001045437882344	-0,00594032867863166	-0,00085155690938692	0,00260463402523941	-0,00426489820339745	-0,0019039262893906	-0,00480174023892795	-0,00439253729972908	-7.99363e+09	-0,00238153801313717	0,00239400964142875	-0,000488171554432479	0,00126820397738937	0,000719526631415199	-0,00162831694097669	0,000654913654255174	-0,000937996564392689	0,000364606191659212	0,000502202282192649
Gau-8-R,selce_OK.auratus	auratus	1	0,0166175946868712	0,0505739295776027	-0,00320012426107185	0,0436993262208648	-0,00461533136878925	0,024617592174971	0,00283637961375235	0,00386521687211687	0,00241126364718646	-0,000749789709543831	0,0026000100974485	0,00189772541977198	0,000805737007690861	0,00263372570024625	-0,000513270060442804	0,00172200689752684	-0,00154446286682508	-0,000110201610824434	-0,000608011082906262	-0,000212993857328155	0,000516836506106897	-0,000302200307350733	6.27524e+09	0	0,0200766823035609	-0,050336168670356	0,00507341101322063	-0,0277425879448221	-0,000412498873311403	-0,00147645742625984	-0,000758810569461126	-0,000322320836589872	-0,00414354973900397	-0,00124231485570265	-0,00167001131857487	-0,00449451440259818	0,00174843596266155	-0,0026446480914031	0,00187255396228036	0,000730416205269828	-0,000648707976648928	0,00096246607448824	-0,000966395124526406	-0,000246371770759231	0,000354086899334786	-0,00089715383601331	9.45882e+09
Gau-9-R,selce_OK.auratus	auratus	1	0,0104821867531907	0,0621366628953785	0,00561496298412031	0,0478133277245717	-8.52095e+07	0,0149253982391044	0,00328499630543543	0,00279098135581707	0,00394490261596124	0,00206233349999526	0,00208667947295312	0,000763113493993906	5.73421e+09	7.7486e+08	2.26351e+09	0,000424099532842062	0,00126559549921322	0,000635492602452414	0,00118745730240932	0,000227733589936276	-0,00038966368983596	-0,000601157296234428	-0,000219028158694036	0	0,0105788234371911	-0,0129758420036419	-0,00624234156650359	0,00907408367437476	-0,0100672073321948	0,0135232469367758	-0,000738554717682574	-0,000831914860603523	-0,000918597774500567	-0,0020925713525183	-0,00183713851755376	0,000967009186079363	-0,000614632315890215	0,000758071029735719	-2.78013e+09	0,000190356120521998	3.27062e+09	0,000474284696539819	9.98546e+09	-0,000207511548314663	1.21366e+09	7.79499e+09	0,000680975949971682
Gau 2 L,selce_OK.auratus	auratus	1	0,0299046786379094	0,0387337359147479	-0,00101324171323232	0,0340359670454869	-0,00347740178077024	0,0183858333419294	0,000938108835484271	0,000902085046563	0,000900990230941476	-0,00179926643177187	0,0017764408801659	-0,000413475179253858	0,000936772546725937	-0,000250572839605978	0,000613646062872881	0,000599477638511912	-1.00874e+09	0,00153215962608208	-0,000626137359402574	-1.86368e+09	-2.45193e+09	-0,000241738430391573	0,000681704778213927	0	0,029297667906626	-0,0539543760645486	0,0175992863043847	-0,0409371238468855	0,00481435476902764	-0,0115143436940956	-0,00282753837485136	0,00226785432740621	-0,00322905878539739	0,00117991730992243	0,000225960306577877	-0,00196961027410911	0,00172643215793208	-0,000607808479921923	0,00172061066395344	7.57943e+09	0,00142123925079288	0,00112197142947967	0,000579103777276734	0,00206602705447906	0,000733095396105235	0,00181002983089584	0,000453623353652463
Gau 3 L,selce_OK.auratus	auratus	1	0,00876464027089794	0,0516749295388556	-9.35607e+09	0,0430029149381273	-0,00213535817500449	0,0179542193543509	-0,000718354908867087	-0,00112953950133741	0,00083089282932309	-0,00174919229726335	0,00169576742518297	0,000995695617553512	-0,000936745376653869	0,00240595138012363	-0,00143154462615261	0,00122199259288108	-0,000205644246681566	0,000241599757982591	0,000787091820272768	0,00010004077115615	0,000819805203573523	0,000113437515663949	0,000307275618292988	0	0,0225267925487547	-0,0617453930019563	0,0127363424842417	-0,0323254404977817	0,00054414390231775	-0,00118732727488489	-0,00206323851530096	0,000962976654588348	-0,00377805075743132	-0,00342869700881854	-0,00269800744538249	-0,00588266762435022	0,000596316986214368	-0,00289429956974429	0,000827081372238619	0,000117801752582022	-0,00046085951152314	0,00100100348330227	-0,000241924733262057	0,000573262419153438	0,000831717666229169	-0,000186324305054495	0,00132941390498049
Gau 4 L,selce_OK.auratus	auratus	1	0,0197083916236111	0,0581111698947272	0,00918170851094026	0,0415393857605275	-0,00648246509392341	0,0136183917245595	-0,00126123848233495	0,000760935755537349	0,00447658043495722	0,000606358306220857	0,00311083704675228	0,00104836943219851	-0,00150648068567071	0,000788169921152596	-0,00108815775368124	0,000971474176265857	0,000462384056305014	6.58001e+08	0,000160765504290179	-0,000959271310932143	-7.13379e+09	-0,00017376212813257	0,000220645720383206	0	0,0248611858009942	-0,0302523061293522	0,0161589301879662	-0,00223849122768146	0,00765045145127148	0,0101896979967104	0,00173569359263811	0,00385164237201711	0,000913195910586956	0,000823258695799694	0,00244337819320286	0,000567390599578829	0,00192843957183047	0,00216704971888238	0,000387177777876576	0,000801796257034341	-0,000480644033808782	0,000898164749280945	-0,000172819256037911	0,00081117635517114	0,000543865773159601	0,000176636914479957	0,000299610839772464
Gau 5 L,selce_OK.auratus	auratus	1	-0,000625600979224636	0,0555216577530308	-0,00740855220688398	0,0467555004053205	-0,00103059886709449	0,0226766515421799	0,00306877371192343	0,000508507301434255	0,000721571778605472	-0,00183995771054055	0,000193702571436817	0,00180650828986372	-0,000451895267949351	0,00179653212592333	0,000407388502428848	0,00209933633107491	-0,000313088720613839	0,00026476921549509	-0,000346182482669171	-0,00115709840643754	-0,000716139280934922	-0,000778639314394801	-0,00055174896153425	0	0,0105173293560047	-0,0501521649157212	-0,00383149637324953	-0,0274289674823089	-0,00481363114244651	-5.62231e+09	-0,00347480466001183	0,00544482750549519	-0,00206132940094151	-0,000737582086793733	0,00148249725391189	-0,00468535390429942	0,00055860108633165	-0,00194932803842093	-0,000916864976277852	0,000647990211821502	-0,000944823055911069	0,000871250195714531	0,000347859346175841	-0,000132118455455666	0,000810187110177104	-0,000266198138237208	0,000216998548652406
Gau 6 L,selce_OK.auratus	auratus	1	0,0259934786842109	0,0422697932594346	0,00419960590905084	0,033273213778903	0,000253476524634841	0,0128728472696219	-0,000291428765341537	-0,000676548310785973	-5.56266e+09	-0,000823555038118185	0,00225197549110013	-0,000917377665427313	0,00247981287021462	-0,00135649460890165	-0,00108638374395908	0,000357618884895174	-0,00298435910966221	-0,000409657742597955	-0,000944416527439658	-0,000408868909589353	0,000697053375957549	-0,000245372526772409	0,000891862454095857	0	0,0138324028262021	-0,0533256838986281	0,00434797854311955	-0,0292012276223427	0,00327169659857503	-0,00429493231484375	-0,00219114249975392	0,000628161944391017	-0,00569792854645806	-0,00279619697816558	-0,00176850576570893	-0,00298810924474643	0,000538928547598462	-0,00209612697661634	0,000964253759232896	-0,00106783539019594	0,00089838429568531	-0,000481906275761199	0,000101076796679159	0,000391735515729782	-0,000684608794021722	0,00176048036340998	0,00100065024165701
Gau 7 L,selce_OK.auratus	auratus	1	0,0211198283477853	0,0522364424088786	-0,000638379420710462	0,0398728139898813	-0,00208689186930945	0,0208534383973441	0,00192589465717579	0,00367973906898386	0,00167703752477798	-0,000905271874326036	0,00233807616015153	-0,000212847527215133	0,000830685219240629	0,00279710801571215	0,000169739754604252	0,00352015409712956	0,000555785945094103	0,00167614224160217	0,000646623991062945	-0,000587082554152929	0,00056261039827182	-0,000232893478915685	9.54911e+09	0	0,0367776684974117	-0,0517847424855279	0,00950528731395712	-0,0284439828357045	0,000455977113158184	-0,000178903596619729	0,00185053746765821	0,0045221998284662	-0,00190788227145987	0,00127006564468971	-0,000106392414524261	-0,00207850546615918	0,0032487019063387	-0,0022004171132849	0,00222277886881458	-1.31503e+09	7.27777e+08	0,00104638384891829	-0,00162618359119063	-0,000184007835634397	-0,000423699612225898	-0,00114183175458623	-0,000115178035234516
Gau 8 L,selce_OK.auratus	auratus	1	0,0164562537853525	0,0603151530732368	0,00106569751226184	0,0412347597176746	0,00241438103799558	0,02617744185072	0,00330051012742029	0,00202539300252463	0,00341604458072586	-0,00120384558496976	0,00188741426183852	0,000166001599008201	0,00133135932487409	0,00365006461400694	-0,000627393389474404	0,00150182202501699	-0,000290113208715492	-9.19672e+09	0,000528236162057921	-0,000751704062227973	0,000261462734190848	0,000192474677802203	-0,000401960673774507	0	0,0397480833075786	-0,0422866239168653	0,00651293834541544	-0,0223987404441143	0,00220553160991701	-0,00310810661352339	-0,00140987107046365	0,00245763679668678	0,00042038475273392	-0,000165025808306092	0,000972996795181741	-0,000833476472260695	0,00245794766707057	-0,001647079272623	0,0011126036217382	0,000372551156813851	0,000157324552365428	0,0014280639450971	-0,000379290530776156	0,000984473981076787	0,000206975285144032	-0,000526184205578176	0,000499787225025332
Gau 9 L,selce_OK.auratus	auratus	1	0,0245076382255957	0,0639007162323615	0,00964972734322263	0,0398227630941699	0,00591038612442541	0,00301425415810814	0,00402861019707876	0,00187518358691235	0,00483176070694226	0,00282496736292231	0,000684038554513714	-0,000614150187918105	4.06517e+09	0,000338723954075292	0,00108379359849767	0,00052247937892219	0,000614452850737411	0,000155324766736477	-0,000890454946848359	-0,000890394046613194	-0,000455493604004509	-0,000118647999671926	-0,00043663180111696	0	0,00712997310736345	0,00377605844990264	-0,0105270791151531	0,0263805189859445	-0,0081490269192275	0,0145535733872255	0,0055895802446294	0,00108990418596217	0,00108417202955466	0,000396423202787256	-0,000159573186078236	0,00173947616137601	0,00142546918959812	0,00109060794127997	0,000448236916944835	-0,00120471796051275	-0,000364779112493813	-0,000887423247480102	-0,000396706168468085	9.43519e+09	0,000463784954228327	-0,000107544375742902	6.91851e+07
Gbuc-1-re.bucchichi	bucchichi	1	-0,000446301435321786	0,0351490855741558	-0,0123889166070446	0,0252257544428276	-0,0123485882187816	0,0215889658739624	-0,00148015532790559	0,00608251976849639	0,00216108619878671	-0,000141222638859881	-0,00166406842922673	0,000219148188139816	-0,00441891145569218	0,000722992947480682	-0,00374452921295981	0,00014898716548097	-0,00230532008853933	0,000601745119561543	-0,000947138896412064	0,00103144904383251	-0,000112681746086991	0,000978721307379322	0,000536711473181861	0	0,00183412935266641	-0,0401842927214912	-0,00771576604363772	-0,0394782858675612	-0,0123212247359941	-0,0160713049764557	-0,00957610299071922	0,000185896439556185	-0,00488301319055995	0,00139739936117178	-0,000694253943938246	-0,00158980263436502	0,00177046952106501	-0,000756234397137888	0,0011739512413667	0,00018205714474512	-0,000396334442269002	-0,000347874696896143	-0,000729324540893243	-0,00114137882481289	0,000180421482010429	-0,000564526042474041	0,00106448707871198
Gbuc-2-re.bucchichi	bucchichi	1	0,00556936000007416	0,0469849303796546	0,00311764307177562	0,0292092107782328	0,000535612924862423	0,0231309253839558	0,00253512118856723	0,00826054067103315	0,00277990141090924	-0,000336779476573079	-0,000117892484442257	-0,00280302767826045	-0,00156319184883147	-0,00228972793001807	-0,00070049063362233	-0,00145336813435464	-0,00109355832328758	0,000163738746644796	-0,000598917576202114	0,000707117963868571	0,000211396223362116	0,000375002470784675	0,000168573209199508	0	0,0134547551437555	-0,0392384024350471	0,00696610249316979	-0,0327714031532777	0,00121277583822973	-0,00849623915092441	-2.44836e+09	0,00209696348687504	0,000185611849755342	0,000192453944291916	0,0014215859723893	-0,00199694086651311	0,00176020377252516	-0,00185566797222531	2.17395e+08	-0,00206789746511558	0,000782292184449625	-0,000833009302313202	0,0015485572815162	-4.66073e+09	0,00068574387000533	-5.06975e+09	0,000393253764922596
Gbuc-3-re.bucchichi	bucchichi	1	0,00928914723079375	0,0320974885912895	0,00241825168076975	0,0135688335804775	-0,00166963507829918	0,0154414144884563	-0,00135949346421717	0,00896089472798474	-0,000825753197572318	0,00314878810939414	-0,00136321571815821	0,000404101065024596	-0,0017626041868016	-0,00115218303130199	-0,000976680674180212	-0,00151656976010996	-5.85598e+09	-0,00113582082992933	-6.53102e+09	-0,000984775726563393	-0,000275895175914718	-0,000428460654278563	-0,000484182199774016	0	0,00856217118734843	-0,0414994944336122	0,00406529302964313	-0,0362162361852421	-0,00260878939312915	-0,0142007656897816	-0,00527242312459116	-0,00222929802423363	-0,0047662595313123	-0,00110410535814659	-0,00187936079302655	-0,000745818370537596	1.09923e+09	-0,000103361132743034	0,00156435377202899	-0,00151582825935754	0,00258859096788465	-0,00195785328742537	0,00129048161804582	-0,000601564142565848	-0,000142951294767896	-0,000584556634442531	-4.1817e+09
Gbuc-4-re.bucchichi	bucchichi	1	0,0258908569345826	0,0223538221764552	0,00792053247900467	0,00498536740849587	-0,00208474745963867	0,011109727956929	0,000822193012255725	0,00579126336881767	0,00279143565175322	0,00189542431665179	-0,000807812928831535	0,000576659475148937	-0,00245928025101112	-0,000897177014224008	-2.72881e+09	-0,00245301417708353	0,00130503561676065	-0,0014793814082251	0,000429398312078478	-0,000167795544583094	-0,000483799086670244	6.46046e+08	0,000212355255194822	0	0,0137341893212041	-0,0463591547959105	0,0115662258005517	-0,0444379005080426	0,00201526886660172	-0,0228813508001894	-0,00502650262341741	-0,00724179319416357	-0,00368167091410483	-0,000603346208429433	5.73071e+09	0,00158597728244636	0,000218016040434878	0,00139349344506814	-0,00118420451151253	0,000653386434379799	-0,000137396145296578	0,000390327116969412	0,000575200223112531	-0,000454510591183082	0,000345680631901932	-0,000699126722067796	-7.30829e+09
Gbuc-5-re.bucchichi	bucchichi	1	0,0119800146081377	0,0443794952812193	0,00306520324522653	0,0241021631284651	-0,00232077427064733	0,0202095697531645	-0,00301977406671857	0,0110486728883751	-0,00105928563750293	0,00306520858781783	6.6774e+09	0,000811777812258425	0,000208379758248293	-0,000511036974410207	0,000988587795642403	-0,000723864075772034	0,000146596011681197	7.80688e+09	-0,00016971206287553	0,00105001762840376	0,000269485748022439	0,00091531565238472	0,000208119829780598	0	0,00137713919181344	-0,0383922592537042	0,00644635712522366	-0,0329048672502949	0,00211088545383145	-0,0138803815522418	-0,00322797981584358	-0,00275741729327385	-0,00517464346153491	-0,00223553684684848	-0,00369186349862563	-0,00276232741404683	-0,00117071178527698	-0,00190584700397065	-0,000120246744606757	-0,00205709415979259	0,000500882701457707	-0,00201424742034281	0,000733619986668	-0,00110367756377505	3.34228e+09	-0,000310182754655974	5.71588e+09
Gbuc-6-re.bucchichi	bucchichi	1	0,0151262444401535	0,039039032000704	0,00557059549059566	0,0253553009082719	-0,00254158044543568	0,02305698567977	-0,00311406745994847	0,0117697031420641	-0,000576062531155413	0,00270087093386216	0,000273905705938962	-0,000963098417609241	0,000881513199409031	-0,000415264812263243	0,000906123282545138	-0,000154734846955222	0,000516879692864465	-0,000596302454653235	0,00010106945851653	-0,000184650735367264	0,000595934453185935	-0,00013872855984663	0,00101240282290707	0	0,00632990075030026	-0,0378792903749844	0,0053884565492146	-0,0367685284800516	0,00237391116047094	-0,0143480302561579	-0,00105546205499133	0,00173640266228488	-0,00131439261172295	0,00231751057388639	0,000361379368474371	-0,000587455619224169	0,00139020434389816	-1.77119e+09	0,00189803736581664	-0,000459912876144416	0,000834410443647103	-0,00131428190248186	-0,000413300525682164	-0,000579210817182654	-0,00016957163407262	-0,000314371823103236	-6.94728e+09
Gbuc-7-re.bucchichi	bucchichi	1	0,00876126692825687	0,0243847903119361	-0,0102162674115261	0,0119176537369011	-0,0169844737893213	0,0140426719527018	-0,0075136993104847	0,00871013435171915	0,00124774130860373	0,00329383197209055	0,00296501997036545	-0,000416440753805797	0,00274449010272719	-0,00151574868005387	0,00126217057936471	-0,00138213789945968	-0,000642573007161349	-0,000334140683757332	-0,000408138102062537	0,000431514350344349	0,000205124979096537	0,000566147215509453	0,000161201574146429	0	0,000513387507803752	-0,039972375813524	0,000233284447930258	-0,0397804506074372	-0,00531657014850745	-0,0210321844997069	-0,00750359149305564	-0,00414924059716622	-0,0075453311645047	0,00164446485090352	-0,00226820247907484	0,000503456466458004	0,00141773993745793	-0,000276851970426425	0,00186483602011889	-3.31716e+09	0,000472494056275277	-0,000806647588504194	-0,000496632941934901	-0,000561593789012313	-0,000316205198885889	0,00042484906869165	-9.81511e+08
Gbuc-8-re.bucchichi	bucchichi	1	0,024276110432853	0,0364376640759396	0,00893501287074606	0,030741273271377	-0,00214607279952532	0,0243441177779733	-0,00172485615225328	0,00810050486373222	0,00333147445092361	-0,00242050572381787	0,00306980786678104	-0,0025005371035893	-9.99863e+08	0,000924305974367664	0,00120918389087774	0,000350487126320627	0,00143397507849101	-0,000602566988976961	-4.47431e+09	0,000180881189457565	-0,000374063968118703	-6.99487e+09	2.93628e+09	0	0,00885612034834254	-0,0316591057759406	0,0118865252581469	-0,0299868917614151	0,00561938084737333	-0,0120235463948311	0,00254780659563559	0,00304770293757477	-0,000352932605646692	0,00454377837944308	-0,00219999305526779	0,00139230979591038	-0,000924624998626557	-0,000379164890856493	-0,000163294909856153	-0,000748494763321354	-0,000149631454659009	-0,000144547344266005	0,000497232957585567	-0,000322835588431337	0,000998954362418688	-0,000169980180070273	0,000464657020006309
Gbuc-Ostro-re.bucchichi	bucchichi	1	-0,0107685996622257	0,0351367940366623	-0,0183024213407446	0,0264033024386134	-0,0103556204499508	0,0204047289595929	0,00481967203731584	0,00451528881734099	0,00233988558944676	-0,00265043725302549	-0,00146202820920974	-0,00261885750862315	-0,000317183636111418	-0,000430532141410239	0,000220970179360755	0,000946175661596901	-0,000561060074516022	0,000667185838309132	0,000156793384132552	0,000306531491822579	-0,000106598526376289	0,000105694285165718	-0,000529136461969678	0	0,0100315286983238	-0,0437762404563213	-0,00616235905073397	-0,0340687932948329	-0,0142541775092514	-0,0086886054175591	-0,00640093790950504	0,000661217705368764	-6.34202e+09	0,00122623162631459	0,00154491659060282	-0,000234673006786502	0,000280597658217664	-0,00180737982331144	6.12107e+09	-0,000557854180901996	-0,000162049026957326	0,000842304731105345	-0,000472924199182822	0,000181909340542324	0,000101102590296049	-0,000302938626914644	-0,000100295328433429
Gbuc-Selce-re.bucchichi	bucchichi	1	0,000963599446962881	0,0442173464172724	-0,00265265611822392	0,0320572549699653	0,00183251666424645	0,0251876215107678	0,0059673738172251	0,00679317461471082	0,00277884698121945	0,000187890611624703	-0,000225601706278134	0,000407062350956845	-0,00122282239855263	-0,00170877327476505	-0,00101010710705462	-0,00030973531114983	-0,00152102487517066	0,00119960271538162	-0,000627469481030459	0,00122092318280839	-0,000542010436904724	0,000696872527710788	-0,000410612441063062	0	0,00864129224806831	-0,0352132532802836	-0,000127713559535248	-0,0286002773438453	-0,00769425573432277	-0,00698111292588948	-0,0055821147499865	0,00157336844234268	-0,000666561875597092	0,00336202499735056	-0,00151478973684685	0,000288166927003226	-0,000894462801691117	-0,00105686452726341	0,000410867932020127	-0,000530853202295819	9.63054e+07	-0,000408946111677526	-0,000213592249592642	-0,00019921649715793	0,000312731494884228	0,000152839706842053	0,00078826357681152
Gbuc Ostro l gedreht.bucchichi	bucchichi	1	-0,00577254321020212	0,0443288376084109	-0,0108401916886749	0,0237140512117758	-0,00453577158757303	0,0193530121599108	0,00489039149567309	0,00703468925314891	0,00459010452848302	-0,0017900170841318	0,00151809050249821	-0,00393882783351076	-0,00102829548911425	-0,00124354119070745	-0,000921785920717973	0,00131579043709318	-0,000227712748330494	0,00133633973361643	-0,000335640196751861	0,00086734111336592	-3.04904e+09	0,000843226387948133	0,000152181305169729	0	0,0181435586135189	-0,0411833956741614	0,00141277348928339	-0,0367242554330448	-0,00664806019503895	-0,01339070017945	-0,00351631138988425	0,0015984736527494	0,00180827991335207	0,00251938678029842	0,00302943670168876	-0,00273817860765068	0,00258848823386454	-0,00226542634475878	0,00136719559673045	-0,000945021355149981	0,000541146039587816	-0,000539226835196346	0,000795588115643444	8.20693e+09	5.97895e+09	-0,000372898439492531	-0,000383732700139451
Gbuc Selce 2013 l gedreht.bucchichi	bucchichi	1	0,0039576811602976	0,0475028769978694	-0,000766356964062171	0,034539134051438	-0,00120843057498531	0,0286705157916721	0,00597947522366556	0,00783307942009406	0,00308623658684922	0,000184843827635226	-0,00136285142540096	0,000166714598444341	-0,00371234710898706	0,00110321112912149	-0,00240826717480133	0,00178306521774146	-0,00241812323446511	0,00225056001894794	-0,00130962882843652	0,00227051434508441	-0,000280573912493273	0,00105066918992424	0,000430058619339192	0	0,00200923780541783	-0,0320405970167508	-0,00265170675321596	-0,0265117619744462	-0,00859761343340153	-0,00787982744095179	-0,00503508323716371	0,00127712311512171	-0,0018169985503399	0,00253908526430772	-5.76524e+09	-0,000225717895821705	-0,00146369879453879	-0,00218214756569838	0,000287986885965951	-0,000852286918417616	-0,000619637319368534	-0,000403069165334312	-0,00119404237408895	0,000503280327214548	-6.3705e+09	0,000596229795778612	0,000334107221373403
Gbuc Selce 2016 1l gedreht.bucchichi	bucchichi	1	0,0078723362526842	0,0493184762559147	-0,00384057896638532	0,027840937114525	-0,00502093274990777	0,0181210386379401	0,00367500819661097	0,000107257715357432	0,00393229689458039	-0,00316692503903651	-0,000890027031516151	2.73847e+09	-0,00190981746940001	0,00134137371721487	-0,000774650968840138	-0,000764348901544457	-1.64741e+08	-0,00118450122234319	0,000466436727593509	-0,000560065832621002	0,000418804690324261	-0,000120285029636005	-0,000238201702007472	0	0,011819722985366	-0,0336660972117794	0,00243552096363834	-0,0290295348251191	-0,00760336307592533	-0,0054511050088721	-0,00524820604043262	0,000714195802728434	-0,00192598523791537	-0,00268486561825632	-0,002288859212467	-0,00326233848276787	-0,00258377585416401	-0,00117352387748859	-0,0016985001090997	-0,000501220742814604	-0,0009416382922938	0,000231096871681096	-0,00126614969919412	1.77029e+09	-0,00117392247778869	0,000306117528539941	-0,00045686298506523
Gbuc Selce 2016 2l gedreht.bucchichi	bucchichi	1	0,00824161295935865	0,0530701646673497	-0,00356540434667397	0,0305843567567243	-0,00185347047657941	0,0230298510679038	0,0023000835179464	0,00865093554168506	0,00199170478391271	0,00101456363830952	0,000519759100238128	-0,000834151380620291	-0,000319668963548082	0,00049779092975919	-0,000778911974062316	0,00151929711603078	-0,000770699790735524	0,000987053686902463	-0,000603670519952282	0,000631215444588705	-0,000203082523063041	0,000249554477976511	0,000207175414737308	0	0,0161265037328678	-0,0400881370173035	0,0029987723703237	-0,0322284324932122	-0,00307373958703544	-0,00845731605833802	-0,00156895492404796	0,0016521478381483	0,000727064085848204	0,000767231376063273	-6.35259e+09	-0,0027747095241742	-0,000206970953635465	-0,00357411650770601	-4.04524e+08	-0,00236811336292695	0,000150407323656023	-0,00120448011370698	-0,000106776390603253	-0,00100421068136093	2.63742e+09	-0,000520314396483105	0,000553019300558934
Gbuc Selce 2016 3l gedreht.bucchichi	bucchichi	1	0,0118108684647249	0,0374824216513563	0,00150992564037118	0,0234765193464446	-0,00143182205776898	0,021730797413842	0,000152340830399965	0,0105073457589818	3.34507e+09	0,00340671246248162	-0,000235185641505241	0,000309084410403133	7.80927e+09	-0,000957193332746115	-0,000370151799912321	-0,00135613601834329	-0,000313239751329558	-0,000729882523195932	0,000520807865320833	-8.97093e+08	0,000572101708265264	-0,000293300536597031	0,000213381780240214	0	0,00746221280340866	-0,0351968850273981	0,00371569978461676	-0,0347723793746783	0,000928584108842795	-0,0129539943044479	0,0015352050833353	-0,00220851430458367	0,000720935312242061	-0,00147271058137619	-0,00228346677092332	-0,000472826803614761	-0,00212239497909729	-0,000146379983460074	0,000106497629568656	-0,00237620616380837	0,00161661333622885	-0,00322077374051702	0,00107698872651807	-0,00198483549785415	0,000324646979542167	-0,000579604173988979	-0,00011866571810616
Gbuc Selce 2016 4l gedreht.bucchichi	bucchichi	1	0,0201807963924484	0,0380166607427998	0,00512396239115938	0,0158315199453691	0,00037001664619174	0,0143252233438905	0,00393086113221883	0,0089282507856091	0,00491585984046545	0,0029070498355625	0,00106622680415661	-0,00107987942435708	-0,000700555571225635	-0,0018234455471653	0,0012766773774629	-0,0017989047627106	8.17782e+09	-0,000925609242962999	-0,000771375727783402	-0,000620066896323768	-3.05932e+09	-0,000797494497381926	-7.54531e+09	0	0,013146397340906	-0,0369788161440283	0,0114049481370295	-0,0352125325793853	0,00349423871713206	-0,0161130822959146	-0,00326986469443389	-0,0039787379970649	-0,00290799968593768	-2.49385e+09	-0,00125263873548136	0,000535588630250526	-0,000380555193464877	-0,00127553319220789	0,000812999508288543	-0,00216694089342544	0,000926858883523667	-0,00058651462171661	-3.4306e+09	-0,000294536217125702	-0,000502384967563968	-0,000195660819739487	-0,000306708248100645
Gbuc Selce 2016 5l gedreht.bucchichi	bucchichi	1	0,0176528580803765	0,0674882364969803	-0,0176568752462894	0,0340382905131385	0,000618476075996791	0,0204698513996596	0,0082905230044618	0,00658151304386682	0,00592938929195342	0,00416509231903494	-0,00187791848035681	0,00017372587277777	0,000946399323371579	0,00137819006200176	-0,00318090537173538	0,0029430855789485	0,00101631196983833	-0,00145716436910292	0,00114214228179253	6.41846e+09	-0,000230828570639857	-0,000335442593056084	-0,000475931253355467	0	-0,0290933417316819	-0,0113647377393715	-0,00560755431130896	-0,0195025154339353	-0,0121327605167026	0,00135292425280415	-0,00635633938682535	0,0013174336528425	-0,000111729915630579	-0,000692688264875481	0,00194191857053435	-0,0026901170490433	-0,00191332259332505	0,00158350076259406	-0,00258477782773013	-0,00193515005915964	5.06748e+09	8.50049e+09	-0,000838823483980337	-0,000499422400046624	0,000774552776924753	-0,000805074576520504	0,000144439376009939
Gbuc Selce 2016 6l gedreht.bucchichi	bucchichi	1	0,0229694760383265	0,0350301829067266	0,00162208362093865	0,0260037378984669	-0,00453364399347326	0,0235793048208291	-0,000149338989590446	0,00868617020375713	0,00325146024188987	-0,000587505960262009	0,00129134195243578	-0,00345564423800268	-0,000592390512085174	-0,0025975847064712	-9.50601e+09	-0,00182598443046535	-0,000476244302970374	-0,00148816671875653	-0,000578751446136389	-0,00057806393419438	0,000509399694135906	7.05167e+09	0,000915503188128654	0	0,0214277866549237	-0,0419024629380138	0,0128987705859681	-0,0373801794031865	0,000653675772970147	-0,0125661744365795	-0,00257096160869239	0,00276650207260058	0,000464047144307159	0,00082068695287504	0,00249486333602125	-0,00263285036750224	0,00276566261095108	-0,00195427244409595	0,0023082991009388	-0,00132455783084458	0,00117609921785766	-0,000828490921275794	0,000172353409029242	-0,000855531009770505	0,000257272580968607	-0,00103917124879088	0,00085427144646435
Gbuc Selce 2016 7l gedreht.bucchichi	bucchichi	1	0,00956579108948069	0,0224372017204181	-0,0183156783047815	0,0072381161860257	-0,0161303197188866	0,0123642235070661	-0,0094426810448193	0,00936478347701576	-0,00072517673209295	0,00377123837736446	0,000724232373865864	-0,000178023382238796	0,00116474875443914	-0,00322476199030365	0,00103453883927134	-0,000364704742790026	-0,00139070907448931	0,000409362944803881	-0,00060029915277153	-0,000224780641164327	-0,000401338563588789	0,000365206569018046	0,000247962800867703	0	-0,00212434978665529	-0,0302872767121263	0,00407854819620055	-0,0402198087006725	-0,00686447313716479	-0,0198595594744515	-0,00782536689067591	-0,00541686531510831	-0,00242011523947915	0,00156970202713226	-0,00156962272233456	0,000587085845918223	0,00106672612210486	-0,00141430492803456	0,00108487638393593	-0,00175930748677842	0,00146520233334038	-0,00198977378144548	0,00077186378672934	-0,000332287246747312	-0,000506221788785067	-0,000609632792231858	-0,000140892322207682
Gbuc Selce 2016 8l gedreht.bucchichi	bucchichi	1	0,0131652202237694	0,0428872840648433	0,00280840833518662	0,0314119564849257	-0,00269647129291618	0,0214373399296352	0,00145268481320443	0,00542357793868588	0,00315291149718996	-0,00107721292157457	-0,000667323110778935	-0,00119962174825857	-0,000936348057826172	0,000700830164165316	0,000962115218209159	0,000968523182456475	0,000390492128539387	-0,000109459157606861	-0,000530332395677488	0,00025006093466284	0,00046296265210527	-0,00017285393475463	0,000573530751312371	0	0,00402736583500051	-0,0392727579380251	0,00683513737090214	-0,0306977554262521	0,00739948745402299	-0,00940614144361369	0,0012309861661695	0,000428818288020028	-0,00230474865357856	0,00200486522126205	-0,000558767531899882	-0,000386942551831939	-0,00133921660214915	-0,00143790739421496	-0,000598542633927824	0,000149342352874285	0,000857541255553046	0,000674426518205554	0,000675531346707553	-0,000666441688425708	4.81229e+09	-2.51759e+09	0,000434659752977506
Gcob-CG-no10r.cobitis	cobitis	1	0,00843879272306079	0,0525594886218219	-0,00756947673785185	0,0124735257034857	-0,0120229232848487	0,0031271175310925	0,00657529663591745	0,00249043126668753	0,00166858452265457	-0,00485763924545443	0,00356098912642152	-0,00270081440691432	0,00184326876467419	-0,00629774481914584	0,000461539108714792	-0,000118373301199199	-0,000662013011671751	0,00117295569940646	-0,000359053083217478	0,00126411353820024	0,000582653702599418	0,00154447517280783	-0,00213785149900083	0	0,0208769705787475	-0,0694951817137503	0,0233986446943141	-0,0265887797701802	-0,00387694148825242	-0,0172855464303575	-0,0102747473010925	-0,00203047485377074	-0,00111690265409106	0,00018813541629444	-0,00542166526487198	-8.81152e+08	-0,00206271919216714	-6.35334e+09	-0,00231621133285894	-0,00350542625453671	-0,000579825706921195	0,000213602579347664	-0,000568671300452614	-0,00115363334735052	-1.78838e+09	0,000276926141355502	0,0012223393834663
Gcob-CG-no6r.cobitis	cobitis	1	-0,00449862250403788	-0,0203162757330723	-0,0169926600699903	-0,0265836682723125	-0,00917668567990834	-0,01042293561525	-0,00282018071486639	-0,00133889896902497	-0,000575985902597346	0,00252118339654994	0,00159737095723996	-6.43462e+08	-0,00353541243051414	0,00411712272350114	-0,00343252253664959	0,00549956859999928	0,00209381986665284	0,00290514888645688	-0,000799010635630209	0,00112779849880446	-0,00283531595819281	-0,00138151455297474	-0,00103892666624242	0	0,0175132355345317	-0,0756318961948762	0,0240535615706777	-0,0447623064025185	0,00577983926483422	-0,0180012656187291	0,00427949500669024	-0,00232009899443166	0,000204960601569109	0,00789589633919609	0,00278159549050521	0,0067230284037833	0,00452353625001348	0,00209221281431529	0,00125369193844851	0,0034973791894262	0,00171655558829073	0,0016813261147092	0,00544818249163909	0,00153724937875065	0,00190784328528148	0,00275644828881402	0,0010507154858602
Gcob-CG-no7r.cobitis	cobitis	1	0,0134242819250192	0,0494120929662928	-0,0151007204403757	0,0372343289725481	-0,0100096187340514	0,0165852608259001	0,00600999137523181	0,00203846005309739	0,0033996424073704	-0,0023929216293533	0,00182655589257486	-0,000374851658532266	0,00105388179333646	-0,000355412678019691	-0,00176768451394502	0,00157996703789111	7.29103e+07	-0,000221991102508362	0,000880116233105008	-0,00089591720857667	-0,000681377089318432	0,00126014011140814	-0,000323943425657528	0	0,0215112803448095	-0,0314768769246848	0,00609900295049221	-0,0291730742973641	-0,00528364974584049	-0,00718685991852136	0,00385320951225355	-0,00401145496244725	0,00470167189463937	0,00215996406016317	0,00313722481077673	0,00267292211609512	0,00373271947939998	-0,0023805420991258	0,00413770453611967	-0,000433738005658729	0,00138551741267297	-0,000558088351242621	-0,000344459064477501	-0,00155535180384185	0,000481465311685794	-0,000306550566774914	0,000349665054840117
Gcob-CG-no8r.cobitis	cobitis	1	0,0135142996487259	0,0471364139516723	-0,00755151397732017	0,0189083451288768	-0,00115133486998892	0,0113593109990028	0,00613152626208908	-0,000754855944959767	0,00475089645690833	0,00085890059252809	0,000906372751489475	-0,00187667919037064	0,000120336822784824	-0,000676144210767422	0,00221301119883934	0,00205365324791629	0,00121950372006551	0,000323061718003203	0,00115648559335607	-0,000911132285379906	-0,000504201381620803	-0,00154847995010774	0,00248183182253607	0	0,0211355411965815	-0,0507411615438354	0,0134019382404787	-0,0363453984728869	-0,00821896191536257	-0,0111724023444488	-0,00969040542794444	0,0012429593550651	-0,00467907263078814	0,000930877394290159	-0,00048435307602986	-0,000657490096467012	-0,00263132035608986	-0,00200361309559884	1.49996e+09	-0,00241904475818406	0,0023907947586613	-0,00254566236167389	0,00176166733214669	-0,00185518858900838	0,000356823246867177	-0,00062950274226895	-0,000704739398937071
Gcob-CG-no9r.cobitis	cobitis	1	0,0160273216456903	0,0337769420176108	0,00828038721666777	0,00545523349617907	-0,00511108448848315	-0,00136806515794768	-0,00592696810455117	0,00636307143893692	-0,000579168959642512	0,00771793626213221	0,00197727201268655	0,00176416326559027	-0,00566965073204388	-0,000257974217343114	0,00409266552609583	0,00276931242473719	0,00386708788175939	0,000977732415141827	-0,00126004180977352	0,000610869211640551	0,00188625455815157	-0,000396194398649852	-0,00019528387207356	0	0,011613102112923	-0,0722280244695695	0,00575632685366483	-0,0289388340090228	-0,000498958241350413	-0,00849453944740784	-0,0103489744927291	-0,00574549541344111	-0,0125414674250085	0,00381348614309465	-0,00151357578141041	0,00146681880213457	-0,00401282228384116	-0,00279845586192972	-0,00571955677849389	-0,00229722934472142	0,00200382856971625	-0,000614084405470037	0,00117793486569702	0,000211916592683759	5.47387e+09	-0,000769650811792101	0,00316457395737419
Gcob-J850-aug17-no1r.cobitis	cobitis	1	0,0198968850580844	0,0828987049958881	-0,02622025817576	0,0312979235123019	-0,00525361801929701	0,0120851182078949	0,00482738166333167	0,00409704548634857	0,000239519541409231	0,00304166971531969	0,00521532189178836	-0,00065514755244676	-0,000687396188851994	-0,000478726160334216	-0,000174368166462472	-9.32732e+09	0,000728478234663303	-0,00155244975431398	0,00253332089130149	-0,000923006145966262	-0,000396091382018698	-0,000141994657788628	0,00114533180051937	0	0,00922806404039359	-0,0466929812092333	0,0119669127586647	-0,0342521025493835	-0,0101466328083347	-0,00631380539288733	-0,0124755052804362	-0,0046098926877949	0,000886004504239546	-0,00305541368541011	0,00427210924460858	0,00235327360451174	0,00201316768929	-0,0014721756064358	0,00287121738737493	-0,00226705638478191	0,00146448061556793	-0,0001500358116254	0,00224524402452849	-0,00172776779200217	0,00188296871681414	0,000528109805666689	-0,0021396769194902
Gcob-no1r.cobitis	cobitis	1	0,026395909003516	0,0473702219934675	-0,00259354161863457	0,017352052667323	0,00768033932784052	0,0134919441413113	0,00717363449374221	0,00889791967213929	-0,00239112904593741	0,00480744365330161	0,000693748547210131	0,000112499653697398	0,00012731959768617	0,00254852392031871	0,00057144317540013	0,00122403990397615	-0,000948098826894156	0,00242936671319405	-0,00231967315429709	0,0012002417639704	-0,00149367183655735	-0,00118687462098347	0,000141164467489636	0	0,0401907341895736	-0,0517802248483654	0,0161196911234251	-0,0368064944986842	0,000338594379768386	-0,0125686736319586	-0,000735283558250003	0,00208571812629209	-0,00276324034641615	0,00752326482121313	-0,00393917238700718	0,00136508713616712	-0,00453717654259734	0,00211704608750913	-0,00204044606277415	-0,00040259429949156	0,00383042388538648	-0,000492607966784666	0,00153964985004919	0,000963897348910287	0,000307693643145064	-0,00117496018107114	0,00226616893452682
Gcob-no2r.cobitis	cobitis	1	0,0264246568314004	0,0469715349593684	-0,0195813397614709	0,018305875851661	-0,00432619925663638	0,016235314542732	0,000430069115613391	0,0056629059336275	0,00262798112917631	-0,00310442154529337	0,000708174769605181	0,000497387880007331	0,000856759397015503	-0,00220625037363362	0,00273117947706653	-0,00190567169172507	-0,000459832036503292	-0,00271220846010868	0,000391510286855235	-0,00244176988686563	0,000665719055204947	-0,00187798845509705	0,000745548388395496	0	0,00635293089209539	-0,0532834410352231	0,023904905376134	-0,0444947150216329	0,00389200882096663	-0,00884804606112741	0,00382457155170877	0,00143083401749452	0,0024429943181885	0,00286621381372673	0,00191678265453434	-0,000311349622117878	0,00316188762433665	0,00175373216137114	0,0010040692020419	0,00216962862415947	0,002831196947967	0,000189141292323748	0,000294477852152268	-0,000391042127038365	0,00115914623943115	-0,00102449541980888	-0,000783775525363775
Gcob-no3r.cobitis	cobitis	1	0,0167253538441602	0,0340704118948919	-0,00603829349234605	0,00744719904431607	0,00233897840531319	0,00897529886171789	0,00504453662894807	0,00455453763430355	0,00500282945517141	0,00160443905556309	0,0045728982155352	0,000495207493811487	0,0014091949498338	-0,00178775206222753	0,00481766285182335	-0,00184744279238799	0,000885078307841265	0,00127575387577352	-0,000775571089096848	0,000260117267679074	-0,00146130772476868	0,00098477961857142	-0,000864406283819087	0	0,0284776367797168	-0,0582112289768258	0,0169417065827551	-0,0423471120636628	0,00262617613965599	-0,0185668837270901	0,000312534549641838	-0,00291452336708666	-0,000518086028536192	0,00453807925466929	0,000567700396448692	0,0059538819957889	-0,0034633936364378	0,00564782647996291	-0,00359116683723435	0,00117946172956946	-0,000326867292386405	0,000369944134092983	-0,000942544515459994	0,00103630977335227	-0,00153987472199025	-0,000148043095794351	-0,0016606670724161
Gcob-no4r.cobitis	cobitis	1	0,0174472044404648	0,0497078339060633	-0,0159861292518419	0,0221782540114093	-0,0063902520890533	0,0116363935076213	0,00035138117269572	0,00208950548043712	0,00413436040356894	-0,000721159198784216	0,00433111383436638	-0,00300057037292687	0,00408085480652452	-0,000563786673216724	0,00206909925542677	0,0012262088035132	0,00127653097297231	-0,000323119979438425	0,000615773203387462	0,000666219669931292	-0,000650919742882464	0,00131491870328247	-0,000629315683559303	0	0,0172319095923796	-0,0374729169940049	0,0010200156049572	-0,0366094226932829	-0,00455351693805582	-0,0157956885399832	-0,00943227704569854	0,00319500579703913	-0,00359436664868776	-0,0023963367989694	-0,000675896209019705	-0,00384513177669599	-0,000855883101258474	-0,000861141696287239	-9.49907e+09	-0,000610023205759912	0,00102123402586123	-0,000510314833626748	0,00026267417247349	0,000624743628209665	0,000170749348187666	-3.27599e+09	0,000316005743560262
Gcob-no5r.cobitis	cobitis	1	0,0059238800330494	0,0423408850572414	-0,0146578673851713	0,0176753131828703	-0,00508800040003572	0,00580688981330166	0,00291335518568511	0,00124439096604485	0,00121020282647206	-0,00463949573292188	0,00577589293673702	-0,00311442605649235	0,00428655871267493	-0,00113227848364842	0,00403919866817736	0,000627681676986905	0,00600589519238796	0,00159976976524522	0,00275822078778052	0,00255699759179111	5.75494e+09	-0,000717856297955578	0,00098439730132904	0	0,00239379008313494	-0,0425998107667719	0,00847503643845581	-0,0399235537119473	0,00218201137626539	-0,0115310249843378	-0,00503084897971246	-0,000682302078185284	-0,00399569849605013	-0,00194352830470519	-0,00307188208294358	0,00174921530050442	-0,00101905819689638	-0,00135386945276925	0,00221546041951367	-0,00142535869780439	-0,000286058213199526	0,001349441959514	0,00211229383425235	0,00190671420716103	0,0015057249320623	0,00371264443366106	-0,000848468921117587
Gcob CG no10l.cobitis	cobitis	1	-0,00170568968402984	0,0823375647768275	-0,028043836416751	0,0174174605451527	-0,0192409699151735	-0,000357776430579874	-0,00739634591176145	4.46349e+09	0,0040327285300899	-0,00196219110875118	0,00370937490413517	-0,0037969205205294	-0,00329308494373669	-0,00341544046362328	-0,000209694706406222	-0,00163511310571528	-0,00154350373614272	-0,00564135042118175	-0,00245967805094903	-1.28085e+09	-0,00136937325949032	0,000761409285945641	-0,00146310290321824	0	-0,0345227340292495	-0,0650792910247385	0,0145880534264231	-0,0247804291435766	-0,00242704191093758	-0,00978610183796122	-0,0103463548424334	-0,00523865244528963	-0,00360993684578406	-0,0022748916663871	0,00317330464019465	-0,00220808848603799	-9.66387e+09	-0,000250806345794558	-0,000483409077994776	-0,00251851942279117	0,00263171726416422	0,000988946785131966	-0,0039624052838524	-0,00229912280647194	0,000171443514069066	-4.69008e+09	-0,00203924100566491
Gcob CG no6l.cobitis	cobitis	1	0,01086175450163	0,0212291232126268	-0,00921649537539053	0,00573041959951289	-0,00817052077841566	0,00683607463849304	-0,00544951540482483	0,00120321737917374	-0,00459339033924463	-0,00244383406373358	-0,00155081998826107	-0,000671315814764836	0,000204798678556355	-0,000123397947869534	0,00209453195950429	-0,0041499562450788	0,000688522074704904	-0,00303504297325331	-0,000918379783127572	-0,00238484656432308	0,00182293084912939	-0,000209884595857645	0,000315662359934698	0	0,0172122024212858	-0,0744822710090629	0,0178696801572624	-0,0453133366958687	-0,000272425601290331	-0,015581494009129	-0,00060106739441485	-0,00135836031924052	-0,00387099763469859	-0,00281445240398009	-0,00278742584943075	-0,00397912108302474	-0,00270227335725312	-0,000751615910673971	-0,0021442869785046	-0,0014999553929973	-0,00145795553340116	-0,000697393523441014	-0,00299494528982782	-0,000262905082715657	-0,0027134696982403	-0,000258628709141356	0,0007493606998283
Gcob CG no7l.cobitis	cobitis	1	0,00832295136905379	0,0577592624690858	-0,0211076729611416	0,0253760011853106	-0,00693902621471129	0,0108206634590791	0,00463324748206284	-0,000193199104737852	0,00231112847286286	-0,00177111808675333	0,00272902123121961	-0,00334405422772217	0,00365488022434237	-0,00202039823858954	0,000680817304658685	6.59861e+09	0,0020552413668365	-0,00041784643844283	0,0036503063049307	0,000533283760480322	0,00109679381793733	0,00125088267956806	0,000866802809215358	0	0,0135999594165879	-0,043832432041594	0,0128617328653305	-0,0361004267632681	-0,00179292489182895	-0,00615901878421806	-0,000765646037159983	0,001799152526782	-0,000395007020800993	-0,00116706565521756	0,0061472216174986	-0,000632504416786086	0,00319568369576984	8.40697e+09	0,00240161583950153	-0,00080354767040416	-0,000189443988500072	-0,00184116525559133	0,00126590926290855	-0,00108649996339181	0,000112360758452582	0,000782997701029078	0,00054851147671795
Gcob CG no8l.cobitis	cobitis	1	0,0197858328319776	0,0568226641485374	-0,0132090033541926	0,0079694448226011	-0,00585494735843502	0,00571039391750344	0,0009411056069611	0,000388774864290231	0,00220804510046695	-0,00319909525527707	0,00764592512531367	-0,00150805124131344	0,00301957329223416	-0,00243494734817339	0,00378267076472444	-0,00323963144421421	0,000914164130191095	-0,000207765549124205	-0,00101532421282148	0,00179456278676415	0,000206492552863415	0,00186000033200629	-0,00115655870943858	0	0,025990596468361	-0,0553776857759737	0,0161559873528461	-0,034882927204799	-0,00283927886488329	-0,0204834171151044	-0,0061058183624108	-0,00339109137965388	-0,00648102284695017	-0,000909700572654543	-0,000827401487427278	0,000226869597999579	-0,00164994210217428	0,00567932821552921	-0,00441672768320859	0,000598108046326074	0,000356405506749795	0,00147371811744324	-0,00203284545360669	-0,000215816384756579	-0,000620726058246975	-2.22976e+09	-0,000718883482905642
Gcob no1l.cobitis	cobitis	1	0,00868496538280839	0,0535024140541185	-0,0129485764710313	0,0207096184144927	0,00297732094620907	0,00730183841363723	0,00455134563336723	0,00517961165013814	0,000529228823162989	0,00268110755206676	0,000357815253012439	0,00124868337771735	0,000814221439618569	0,00365189895265053	0,00272668798292934	0,0019212586361333	0,00169132172837854	-7.33937e+09	0,000924996800263065	0,00120545652445648	0,00209283658715967	0,00171310745066742	-0,000701807934640613	0	0,0333699635274236	-0,0527804395228748	0,00984309930233154	-0,0360626094409416	-0,00263219952496939	-0,0197817925829326	-0,000249764581426527	-0,0086350299672683	-0,00146021833646357	0,000615118872236934	-0,00313910874797674	-0,00212829451491956	-0,00239852143654491	0,00160897659819482	-0,00430521551668939	0,000497964367032314	-0,000162255783413494	0,000460760569300126	-0,000832235241254738	0,000927117731275492	0,00131417481657178	-0,00114278335980982	0,00297198458026925
Gcob no2l.cobitis	cobitis	1	0,0106783992365961	0,038783728429357	-0,0138529716004814	0,0260637193534216	-0,00729027176460307	0,0157734955757686	-0,000115066830215786	0,00753227373458825	0,000453113865207258	0,00279133990472078	0,000571726800036464	-0,0011395772970499	-0,00146376488134632	-0,00236012284265834	-0,00106195201484441	-0,00114736925260663	-0,000684131201421598	0,00126941787632757	0,00116220836360233	0,000465456903708777	0,000911130187942133	-0,00052526788466277	0,000794709913517695	0	0,0214550219306356	-0,0548474883723841	0,014351993633955	-0,0375255265903914	0,00353456131242958	-0,00876260166504096	0,00217600329723348	0,00298526952321944	0,000562656286642306	0,00637308926628647	0,00320484968701302	0,00280907607533491	0,0059042199904129	-0,00071028689034696	0,00171912052953005	-0,00197089444459705	-0,000206135569594375	-0,0014637003669191	0,000214541762203019	-0,00113868335094738	0,00123167735801402	-0,00149103194918267	0,00190183930064863
Gcob no3l.cobitis	cobitis	1	0,00934120189283157	0,0480220078816735	-0,0114439529509162	0,0230351786028519	-0,00187825360083386	0,016224510353763	-0,000218116498950982	0,00772862095492622	0,00128639990830294	-7.56471e+08	0,002549271116321	-0,000999230506403947	0,00183861871218682	-0,00378838730471164	0,0018437102425227	-0,00226651894709454	0,000965453864635445	0,000331099728287905	0,00168267595618133	0,000899526487508465	0,00107712586988039	0,00111426482887293	0,000538374934428104	0	0,0258510991588647	-0,0532928442610489	0,00921867177320038	-0,0387547689033827	0,00285649813540905	-0,0128672763221162	0,00411123987907528	0,00015033732156565	0,00182868173889363	0,0047630658828956	0,00377938195133682	0,00277335268083299	0,00293034566217517	-0,00122104279249707	0,00184161411447575	-0,00174715733199746	-0,000317480264498437	8.49932e+09	-0,000198118476369675	0,000511953564192863	0,00119916229653036	0,000837330577166238	4.09184e+08
Gcob no4l.cobitis	cobitis	1	-0,00301307552389625	0,0692335640362474	-0,0148857513178884	0,00687156421169097	-0,0174565912599762	-0,00255904081524066	-0,00608342970708495	0,000521979079592941	0,00357375176651317	-0,00797652796498508	-0,000110715399997203	-0,00522489692873304	0,00344200761691099	-0,0055873655136878	0,00153765314840726	-0,00336978861595081	-0,000322673730628626	-0,000872706287447896	-0,000296108119243183	-0,00186668267071657	-0,000538878193695129	0,000940115760630271	-0,000283681812260387	0	-0,031669083686402	-0,0631863639037241	0,0102564026241076	-0,0235351912213168	-0,00386776185727838	-0,0167402246184093	-0,00715831122832465	-0,00556519764659642	-0,00033737037257306	0,000890553630323834	0,00164441088586646	-0,00328139420640163	0,00108494478845688	0,00209672435156965	-0,00104556898062467	-0,00292679083453306	0,000439579873027503	-0,000731129311614855	-0,000459212831037601	-0,000932996994948559	-0,000940830616427806	0,000270363251311461	-0,000554914911139484
Gcob no5l.cobitis	cobitis	1	0,0117925589870153	0,0501669610771	-0,0187219072522895	0,0191536622164518	-0,00289655000711058	0,0127672956536859	0,00251456683832985	0,00376297824116654	0,00456270257154846	-0,00327761698429699	0,00121585377061023	-0,00518775706740344	0,00577088386830456	-0,00638961735582578	0,00496577325178903	-0,00164265394686436	0,000901150378554032	-0,000689002696895289	5.01951e+09	0,000731296239598206	-0,000718858264515943	0,000310351235378271	0,00153923731933767	0	0,0162974398332548	-0,0434598180309713	0,00288365248611082	-0,0379705380100928	-0,00505397267250149	-0,0124910235422748	-0,00277307775436864	-2.23579e+09	0,000458016313544649	0,0013322742025801	0,000167616190617745	0,000648942932998081	0,00237379789241123	-0,00133810576698558	0,0013908402190595	0,00164552760713041	0,00160696030626682	-0,000373093162535746	0,000996952302001423	0,000454061953278464	-0,0026313239990055	0,00122588571362174	-0,00143647559094361
Gcou-1-re.couchi	couchi	1	0,00783467393907239	0,030939477593155	-0,0124762302397898	0,0351698108716118	-0,00244258841523951	0,0210569677968712	0,00693252156645024	0,000969240462981207	0,00135419414723902	-0,0026212611988534	-0,00160903940660057	-0,000496681813922541	-0,00069830236926497	0,0017530443293872	-0,00127703379484287	0,00206383430513849	-0,00132599774117855	0,000351819173368137	-0,000477755316110015	-0,000264266501281529	0,000560164288341477	-5.48148e+09	0,000557106209461945	0	0,00222605494255501	-0,036176466389242	-0,0163331618816453	-0,0150072798085402	-0,0184623111076708	0,00211980406478986	-0,00238820395277956	0,00137151948092541	0,00220067139851513	-0,000551978166970437	-0,00213237540241657	-0,00228564823136625	-0,00150260261802428	-0,00210109183234432	-0,000516835099014581	0,000657624290071816	-0,00135334219194178	0,00158613198408355	-0,000661327894426697	0,000910578053465022	0,000134690008629575	-1.47655e+09	0,00026223384684024
Gcou-2-re.couchi	couchi	1	-0,00929996488061733	0,0468480854794701	-0,000792134351580327	0,0432474889156894	0,000171524720093866	0,0192239394024655	0,00826537861029653	0,00218093649279602	0,00295388658729191	3.92332e+09	-0,00183694697021634	0,00164931193071485	-0,000594616119651623	0,00111929173109622	0,00123055401207082	-0,00105325421081203	0,00238484928020964	-0,000948049903995042	0,000876293662579131	0,000266101584933117	-0,00109143525710049	-0,000844093070933942	0,000121387159295197	0	0,00496865257483536	-0,0165358185559948	-0,0227139228315016	-0,00602612507674394	-0,0190561933097982	0,00961324206293409	0,000120831078631189	0,00103825157544572	0,00339698209375957	0,00199443372510627	-0,00158562739267418	0,00193402531046681	-0,0041145296510873	0,00183492367645308	-0,00187424945073014	5.26868e+09	0,000159437285821597	0,00110947280876284	0,000456366820568002	0,000306992890718807	-0,000171305296871082	-2.48415e+08	0,000871157027474803
Gcou-3-re.couchi	couchi	1	0,0203847993481821	0,0229981020626909	-0,0283053399875593	0,0346462797595857	-0,0223257327471245	0,0180635672225025	2.9896e+09	0,000376649007097512	0,00268363051877528	0,00100301413902175	0,00069100333140883	-0,000414354084290099	-0,000402279626420288	-0,00179161110171939	-0,00374431001447954	-0,000504146560400351	-0,00356179253451461	-0,00047658545612185	-0,00165284681072361	-5.27052e+08	-0,00197570558826048	0,000437399244349213	-0,00149612768863234	0	0,0145494327362578	-0,050634638865375	-0,000925818136129057	-0,0324876330156965	-0,010798490526057	-0,0120639300238096	-0,00327976914658179	-0,00646481862422767	-0,000714566363621947	-0,00105627854601976	-0,00204798727943148	-0,00197352095585408	0,00245112063618922	-0,00382859436854827	0,00270496550009809	-0,000835426374837055	0,000278090246454767	0,000833387200161373	0,000311859180314058	0,000390596294985088	0,000110943997877445	0,000463973954334933	-7.19229e+09
Gcou-4-re.couchi	couchi	1	0,00252231045989291	0,0367492634472185	-0,0243686431258067	0,0280733784825858	-0,0214551556287504	0,0218772521323415	-0,00287489466136359	0,00455728942718215	-0,00233279835117117	0,000810449687572091	-0,00177982780107741	0,00118482103838898	-0,000138893155844651	0,000507254261015007	-0,000864615546124208	0,00111003761385803	-0,00215086210486689	0,000409210313645179	-0,00122383859290185	-0,000205175002319692	0,000136801188559737	-0,000448598884369906	0,000333650833071409	0	-0,0122416542412221	-0,0504642668835551	-0,00143047346596834	-0,0321039366933233	-0,0163659046383167	-0,00858349403149397	-0,0132417810323651	-6.26443e+09	-0,0087543678017922	-0,00163642279132841	-0,0024790045672435	-0,0032161502071211	0,00253100970677757	-0,00112949860172306	0,00273200441464681	-0,000991463462348649	-0,000132183666279413	9.45719e+09	-0,00279196754296986	0,000929882966121741	-0,00124912053110772	-0,0007665756522986	0,000566005028372433
Gcou Croatia 2013 1l gedreht.couchi	couchi	1	0,0274114492030548	0,0346388927630265	-0,0106565152462546	0,0323845169796605	-0,00359132783043848	0,0219528610262613	0,00325614337039653	0,0101072936227136	-0,0012800465839886	0,00250625784166833	-0,00332191830795845	0,00103409382459372	-0,000579571734293799	0,00114720648641823	0,000928996252171173	0,000794120774952041	0,000363002616304003	0,000679142520052452	-0,000319450660631698	0,000299949985588181	-0,000106913622027081	8.6135e+09	0,000361386099530321	0	0,0330387456998946	-0,0528038779152963	0,0048158648511005	-0,0278330699349302	-0,00816131342208152	-0,00363134051616539	-0,00203351798371849	0,00550361261781847	-0,00182761760928828	0,00255411892394287	-0,00119298108710229	-0,00232752772070869	-0,000320192028932925	-0,00362793823806178	0,00022670172296	-0,00282236214877761	0,00165431715398429	-0,00104747736549037	0,00140264324007216	-0,000169832281043528	0,000346207081272721	3.68696e+09	-0,000302309320447171
Gcou Croatia 2013 2l gedreht.couchi	couchi	1	-0,00822998140528412	0,0450619108267242	-0,00291117160658896	0,0367762960550873	0,00717044446996337	0,018883877935055	0,00574171477100273	0,00777115280569144	0,00286691852265034	0,00163194192527426	0,00080919963272786	-0,00106557667095099	0,00155163644573996	-0,000582296841481537	0,00222620193234968	-0,00125062332919187	0,00234010766266818	-4.60028e+09	0,000241530002909692	0,000659399438810581	0,000120785368898182	-0,000530338292237557	0,000218523261952188	0	-0,00404787603596831	-0,0145728876315091	-0,0270107204103396	-0,000342037786073772	-0,0238844585546775	0,01034742079735	0,000464303499243783	0,00274005424775406	0,0047588473399331	0,000599742089064393	0,00158427680806615	-0,000594613906585237	-0,00236834575530633	0,00107075665980678	-0,00311669984307081	0,000317615329922318	-0,00111150183356338	-0,000610023715634472	0,00059826575004624	6.78179e+09	0,000611271473135038	3.51775e+09	0,000421100096535303
Gcou Croatia 2013 3l gedreht.couchi	couchi	1	0,0122568653118586	0,0453921711355083	-0,0131135574390418	0,0434390418990186	-0,00641198961139154	0,0184581576202168	0,00608092150863607	0,00469594359742415	0,0048914669235271	0,00242400729441296	0,00177584530203224	0,00392016899003844	-0,000819789479128549	0,00281394140023611	0,000546970220649595	0,000655635440247616	0,00139829107954528	-0,00021102865678405	0,000790396226471817	-0,000493327935714616	0,00123415076349572	0,000868556173115207	3.31465e+09	0	0,0278169092986287	-0,0356399162016477	-0,003511190185976	-0,0133870593177295	-0,0139342551248986	0,00504682258769513	0,000778965091331038	-0,000564195908267528	0,00232714594756755	-0,00121368764235765	0,00293663648823765	-0,00195872364101936	0,000949556168045981	-0,000516135450495527	-0,00199106814368639	-0,000865176790732538	-0,000145509054921432	-0,000654337270734229	-0,000879569477517402	0,000315177672641691	-0,000743154278638439	0,00033535717066083	-0,000266401820980371
Gcou Croatia 2013 4l gedreht.couchi	couchi	1	0,00429353798518048	0,039167927710716	-0,0184892141213497	0,0402418729470335	-0,0105458542896092	0,024580890581485	0,00276598179156331	0,00698300018419366	0,00210552683912029	0,00258396696680524	-0,00204491424389033	0,00230167464592012	-0,00415721876568143	0,00219788915311549	-0,00370619747417364	0,00151603209092828	-0,00164166384556292	-7.79942e+08	0,000384158311647194	0,00103569837876469	0,000701753734019527	0,000897018688717868	0,00042447721607271	0	0,000664611726893236	-0,0325444551600254	-0,0154273336517612	-0,0170378789456772	-0,0177619664935028	5.62813e+09	-0,00622906443680402	0,00289083072878	-0,00162558045181771	0,00133474149333443	-5.43717e+09	0,000660946544964343	0,00125071347512921	-0,000229212139687332	0,000370919564490608	0,000302121629762241	-0,00209772201478361	0,000983555680697101	-0,00145989545834929	-0,000238782540311795	-1.53115e+09	0,000401551086062729	0,000534927547520197
Gcru-1 B2-re.cruentatus	cruentatus	1	0,0219115231216354	0,0347307598871952	0,000774856409792459	0,0218557943672194	-0,00839183342132678	0,0108315096772789	0,000444069341115572	0,00413900011918593	0,00319179331003276	0,00246373826303815	-0,00215188388200402	-0,000111431380905608	-0,000494993860301845	-0,00117875931006456	0,000449196644136169	-0,00134599284599405	0,000936666413121709	-0,000543439146032906	0,000742450831327498	-0,00159786480856291	-0,00113135581198979	-0,00102284389146627	0,000371611137039896	0	0,0116998238623847	-0,0651495402455631	0,0109654371994057	-0,0417688754031077	-0,00393980767630753	-0,0168049533936335	-0,0128981258220675	-0,00802283627006483	-0,00124221501645037	-0,00318581946854598	0,00144546749866142	0,00107620646018523	-0,00112257588474595	0,00165888179011277	-0,00126923685506219	-0,00097451913583239	0,000285492944396113	-0,00230454086695676	0,0016993890229218	-0,00153989489002758	0,00120161877330742	-0,00219717545095538	-0,000141847308090127
Gcru-1 M2-re.cruentatus	cruentatus	1	0,0382176557919342	0,0391858752967567	-0,0102509560236137	0,01523689883996	-0,00727417053349207	0,00438156935058672	0,00674518030439325	0,000716071077285454	0,00180624243280259	0,00651139085534138	-0,0039208820216721	0,00407857553698635	-0,000318482280181258	-0,00176813928730311	0,00304433669096938	-0,00433443185045771	0,00325752765398866	-0,00251350758425317	-0,000183843098942556	2.77791e+09	-0,000150891009599833	-7.62549e+08	0,000288090004428392	0	0,0433988108200898	-0,0512230386455067	0,0104775397088006	-0,0331237183344955	-0,00709403716807902	-0,0167887218275051	-0,00714738622971549	-0,0113612365697341	-0,0024375873259328	-0,00394142656432472	-0,00212681071604108	0,000721713259578588	-0,000952057736155241	0,00164480339294841	-0,00148712328312676	0,0025812273748274	-0,000239807034080132	-0,000597190257062952	0,000113181831500259	3.45447e+08	-0,00176211223078842	0,000756883179464859	-0,00161852916289662
Gcru-2-re M2.cruentatus	cruentatus	1	0,00314224216332108	0,0476815067334775	0,00178710043323115	0,0270922747191951	0,000364405105721653	0,0164295827576349	0,00490446015490749	0,00508430208627221	0,00132189900564574	0,00236719867701327	0,00339171510849347	-0,000321637283093385	0,00258640847980202	-0,0010091015474545	-0,000291276011633448	-0,000864073466100738	0,000748149958828018	-0,00106117586473158	0,00110126017979533	2.30616e+09	-7.90803e+09	-0,000418925154221334	0,000453129140624857	0	0,0340828483856555	-0,0501692182020059	0,00516399498622388	-0,0401504119049128	-0,00395959516672723	-0,0133250270751752	-0,00259647814243818	-0,00557232354863236	-0,000744567972081307	-0,00141683156250228	7.26724e+09	0,000948382757444845	0,00142973620821796	-0,000210304576348012	-0,000340685248967261	-0,00171988095495793	-0,00136817296562003	-0,00235745293908025	0,000431403017284633	-0,00203235965068632	0,000164996338622365	-0,00166710440507978	-0,00116839286130419
Gcru-2 B2-re.cruentatus	cruentatus	1	-0,00126636513179126	0,0321171843277862	-0,0246062116175853	0,0174171674755552	-0,017655939336013	0,00724329682103657	-0,00473757088994929	-0,000335344912129027	-0,00406254760898585	-0,00105964200980633	0,000161925130534735	-0,00194583867344466	-0,000961559476321663	-0,00204847226175003	-0,00280020233200881	-0,000509108954176791	-0,001920258279987	0,000757427443878016	-0,00122704821168305	0,00203362409977578	-0,000547231723847762	-0,000501939840829125	-0,000409429599787256	0	0,00350687959480203	-0,0564701562454827	-0,00509544105757851	-0,0416380954619943	-0,0128635217573232	-0,0183056211678965	-0,0106184660002543	-0,0084827784436288	-0,00651593701944565	-0,00338151884093805	-0,000496866026236797	1.65192e+09	0,00467462795374961	-0,000228463262774144	0,00327678477513093	-0,00228420511255476	0,00216358929248041	-0,0022909332452536	0,00230606563831194	-0,000543054439123592	0,000825696447769178	0,00174694244005143	-4.45192e+08
Gcru-3-re.cruentatus	cruentatus	1	0,00924030806917789	0,0513130589228032	-0,0153155892487449	0,0176512545665394	-0,00527092075011334	0,00935673483047939	0,000729266788687546	0,00633602742159402	0,00234428204604936	-0,000509442692299156	0,00286947031539498	-0,00104534514930772	-0,000138590708189987	-0,00210196968269642	-0,000179844987266361	-0,000928411410573922	0,000354443880037413	0,00111323303581442	0,00016520909055481	0,000621740733434948	0,00102059039217827	4.55421e+09	0,00113333764366514	0	0,027789322109795	-0,0476250016988297	0,00449858086497666	-0,033580489701344	-0,00972434027457666	-0,0160445690057344	-0,00532282732545334	-0,00602361358528796	-0,00351596534450716	0,00134807643895197	-0,000373661454517887	0,000354249442242655	0,00087576955063451	0,000337659723795722	0,00100079844057343	-0,000467200215730698	0,00303762648584628	-0,0015879083035195	0,00148852838388979	0,0011922857657743	-0,000539596729602939	0,000603264626548004	8.42625e+09
Gcru-5-re.cruentatus	cruentatus	1	0,0233071116719128	0,0268747335145515	-0,0165079037137214	0,0078034248585409	-0,0138778814255156	0,00159754586594346	0,000877462637002336	-0,000653840771368293	-0,00150447339106711	0,00321737872038627	-0,00459979369341433	-0,000624984174415997	-0,000793813224498242	-0,00171984628272553	0,00118015015821268	-0,000154840713695575	0,00160682999530457	-9.65094e+09	0,000788687942266796	-0,000722680464039121	0,000541708490510176	-0,00146200373121898	0,000739136146419539	0	0,0132817486702976	-0,0601373081934577	0,0109264577312038	-0,0448486643970416	-0,0105935451853913	-0,0174073638141762	-0,0120893643959804	-0,00581871207929095	-0,00272496726190088	-2.14592e+09	-0,000980500950107958	0,00407558678813312	-0,00229067978144736	0,000861222920074752	0,00180148518854103	-0,0026792289444706	0,00230830416772065	-0,000956257877782825	0,00188301732300419	-0,000540239289586158	0,00156795003169663	-0,00133051732997919	0,000373561702761645
Gcru-6-re.cruentatus	cruentatus	1	0,0149760432887824	0,0557861014756676	-0,0158400018262749	0,027681349164836	0,00686691041986484	0,00699129454942563	0,0125300333916876	0,00615973815075172	0,000142216096626818	0,00336903760851218	0,00204285783621494	-0,00357032608901376	-0,000862836750724624	0,000306701803330706	-0,00362906579349946	-0,000928084014312904	1.49835e+09	-0,000786467437802861	-0,0012407517600379	0,00196219218658519	-0,00240009552632122	-3.49254e+08	-0,000184188050782956	0	0,0135515301165911	-0,0300344341810029	0,00241258259904072	-0,0297260986566615	-0,00486978983634074	-0,00752167684237308	-0,013420086866653	-0,00342754187880103	-0,00782863531628836	-0,00418935507854102	-0,00413946798038472	0,000498814846118717	-0,00291054324657055	0,00152650580455554	-0,00113287750793447	-0,00162274417939816	5.50094e+09	-5.73385e+09	-0,0013583540681906	-0,000385091294704859	-0,000928770208240447	0,000880359485321029	-0,00187461179947791
Gcru-7-re.cruentatus	cruentatus	1	0,0164666557255251	0,0446992102868972	-0,0170988852404136	0,0118653794616093	-0,0077523639535596	0,007499113056307	-0,000886835509084694	0,00639067524394499	-0,000101543442622654	0,000358311889400096	0,00120189417753483	-0,00501503147058287	0,00279202930932232	-0,00302116518675172	-0,00108991247198037	0,00213624873773802	-0,000326203825225031	0,0030814728398258	-0,00076580953639055	0,00223645584578283	-0,000272326349984663	-0,000474260857854232	-0,000284664010638528	0	0,0355390002455687	-0,0420906657273275	0,000409859728194712	-0,0218612846328916	-0,017181428391603	-0,0131722177750617	-0,00863372451250487	-0,00919729487059518	-0,00263285788383743	-0,000747922222749628	-0,00215078319662296	0,00278811736057488	-0,0011550831082541	-0,000761107866652052	-0,000351940634247093	0,000610092150139084	-0,000437635664138231	-0,000279047581297348	0,00170750423528158	0,00104025707766086	-4.87872e+09	0,000874078817233914	0,000262429901747906
Gcru-8-re.cruentatus	cruentatus	1	0,0386174770004548	0,0127388932192397	-0,00165899805073687	-0,000752661984331819	-0,00181714223544066	0,00155960237222171	0,00172225563981536	0,00547475286559693	-0,00489547139176536	0,00557694835132498	-0,00333760588473232	-0,00200137296957061	0,00180976711444333	-0,00259096132927148	0,000505174895163187	0,000544839790851385	-0,000518558408351966	0,000480863486753104	-0,000526820649977395	-0,00031477427090203	-0,000363647701052159	-0,00072784864557275	0,0011313721045163	0	0,0352551157272645	-0,0539570605283344	0,0188165475707797	-0,0372536741369605	-0,00720268439225187	-0,0203270856861109	-0,00952627415423654	-0,0124773148159915	-0,00450484320864242	-0,00215936796598886	-0,0044337373790949	0,00405011841187396	-0,00277606307978499	0,000136093440603325	-0,00115644474353226	-0,000748391190184127	-0,00325748602637287	6.0355e+09	-0,00260447667769246	-0,00068504820080266	-0,000861596794717144	0,000282632286187383	-0,000640510064464043
Gcru-9-re.cruentatus	cruentatus	1	0,0314829180043138	0,0153359009279854	-0,00855586464853292	-0,00783725503001261	-0,00513314413311431	-0,0109642676057151	-0,00199190821549157	-0,00454182506159625	-0,00801534425855142	0,0024836457997738	-0,00800067480084764	0,000309244456022013	-0,000744862486502766	-0,00210031751577312	0,00123441053777559	-0,000807668421054564	-0,000174896711862127	0,000280917534033979	0,000523806788615296	-0,000404183135499162	0,00108661286805675	0,000113388882989984	0,000477921717696214	0	0,0148022826040902	-0,0471708696048393	0,00900523549876338	-0,031648590277558	-0,000809839522034002	-0,0147994969780471	-0,00147454199289832	-0,00727173267799322	0,0016059115112244	-0,00333052490826897	-0,000108772655772982	0,0020287273057761	-0,00335393549186286	0,00195496629846375	0,000331220366999487	0,000250996935951673	0,000326153652799723	0,001994852913943	-0,000363845670180774	0,00147658570498938	0,000833216123937985	0,00093861078897317	2.42236e+09
Gcru Krk-1 re B2.cruentatus	cruentatus	1	0,0207233317068543	0,0319284167084383	0,000951065747295122	0,0208045863738485	-0,00919230039890201	0,0088879848122712	-0,00161728754402161	0,00222247707095608	0,00248607643988903	0,00235972837273945	-0,00161910196941282	0,000328089754231466	-0,000649053117620865	-0,00155507674744233	-0,000200752539535909	-0,00186062232697582	0,000980648695576443	-0,00064075352505928	0,00121336944519198	-0,00192867549849217	-0,00116819289669846	-0,00183645902481471	9.58077e+09	0	0,00908423441978537	-0,0686509027444386	0,0102489013902864	-0,0428415928163868	-0,00338323788305172	-0,0169353454917618	-0,0132773621982351	-0,00917585797220056	-0,00248593771349779	-0,00433392852023133	0,00112102603339439	0,00131450546977193	-0,000599098505300634	0,0022361952200779	-0,00125192810556495	-0,00108444889275688	-9.42783e+09	-0,00209373301976752	0,00197852882054868	-0,000691706038650702	0,00176575821131191	-0,00187131124960947	-0,000244848696600694
Gcru Krk 2-li M2.cruentatus	cruentatus	1	0,0029059331099176	0,0351400373375978	-0,0133185448059841	0,0253004381793492	-0,00647761813824225	0,0117267211313548	0,00545478418428493	0,00346302002108372	0,000232706419335034	0,00337695397445641	0,00244248425087598	0,00100754708650583	0,00250068480394086	0,00160907703424077	-0,00182417980972212	0,0017795117551504	-0,0010055126260381	-0,000492186994359455	-0,000740576351899221	-0,000882769580571056	-0,00246232442402061	0,000610377521407681	-0,00013948143701867	0	0,0155915927039286	-0,0563804174197701	-0,00686372062286234	-0,0435060018440382	-0,0164964610775161	-0,0132754891021752	-0,0108198416785325	-0,0026070478062467	-0,00517262346534703	-0,00245515843657458	-0,00327904466500545	-0,00169996176192474	-0,00104545917819182	-0,000684635805125474	0,00228720503542147	-0,0013098626873239	0,00358679107656347	-0,00289185363759124	0,00101987090278639	-0,00173602535426055	-5.95118e+09	-0,000578739755098634	-0,00032333949749839
Gcru Krk 2-re M2.cruentatus	cruentatus	1	0,0024278098453319	0,0481679187436785	0,000944472901527882	0,0270105593474972	0,000118931235820517	0,0164645959174588	0,00445195242011701	0,00517849882034014	0,00134016186421717	0,00221021706142141	0,00339452067516395	-0,000305891174351464	0,00255785963869121	-0,00103503408149104	-0,000232874749957026	-0,000828615407072428	0,000461264752829619	-0,000999529579225137	0,00102580224803182	-0,000100821145052485	-0,000253692378788009	-0,000436182869449696	0,00037726831791384	0	0,0329296718845055	-0,0496580107618478	0,00437169489105564	-0,040748750074667	-0,0045249232973835	-0,0133766116627875	-0,00299192015230956	-0,00598115270801337	-0,000651145096909821	-0,00162176797544007	-0,000133264164428354	0,000968073525646523	0,00155052596359859	-0,0002099098987617	-0,000420672126366187	-0,00160299684857195	-0,00125718492734345	-0,00242750740265322	0,000588033822850358	-0,00211518536045481	0,000120076668761004	-0,00178353155605054	-0,00115545539673776
Gcru Selce 2016 1-l gedreht.cruentatus	cruentatus	1	0,0409363038890359	0,0434937194372844	0,00232687594430356	0,0187324534520618	-0,000783511900188588	0,0131249761383814	0,00498325789748599	0,00467155115067699	0,00318109631614784	0,00131891323413591	0,00237622650787785	-0,00112245105964152	0,00218250451258093	-0,000810593788045207	0,000597035990578697	-0,00160889962426341	0,00222716406446315	-0,0014020369048398	0,00120809404239666	0,000499133244041448	0,000118153387303613	0,000294390334821487	-0,000527124844814441	0	0,0472287765225205	-0,0586302532172955	0,0140243723942248	-0,0376951025227634	-0,00414119134097049	-0,0109689886948517	-0,00646923061239858	-0,00358444543395565	-0,00296317410956553	-0,00183476062610699	-0,00245187107030562	-0,000890007114452315	0,000512055009927171	-0,000673419396173859	0,000445351977565629	0,0012115640775908	-0,000658443104849332	-0,000877488967503543	-0,000776907912576112	-4.2308e+09	-0,000893068310426291	0,000640973733067161	-6.03106e+09
Gcru Selce 2016 2l gedreht.cruentatus	cruentatus	1	0,00848371964295528	0,0314473894728171	-0,0243007183818986	0,0212628460546629	-0,0115844228042815	0,0111488650260683	-0,000791679536997633	0,0018926932639699	-0,000637358549739984	-0,00164054134415949	0,000189663719956893	-0,00434512243900559	-0,000985153114166164	-0,00231930476742995	-0,00171783596637179	0,000407481945086713	-0,000563186863247962	0,00146458307435355	0,000464663679006776	0,000591138004989537	-0,00113228472463755	-0,00149326950207419	-0,000545575750284281	0	0,00737190849321978	-0,063269248254877	-0,00709818101270253	-0,0457769618179224	-0,0120754050213569	-0,0206585215109213	-0,00681668315156648	-0,00755535571872732	-0,00409636648866071	-0,00131814863700153	0,000131209787427757	-0,00103801651354089	0,00422638355666727	-0,00187482463641429	0,00347320193701712	-0,00260992232770075	0,00134047551569787	-0,000869799543316761	0,00186096699812148	-7.30714e+09	0,00131903902330289	-0,000123982178394723	-0,000899517286226318
Gcru Selce 2016 3l gedreht.cruentatus	cruentatus	1	0,0219343009277426	0,0514492726042138	-0,0179309926845621	0,0224406398568404	-0,0114167518142059	0,00705892970258957	0,000969408795265992	0,00252230094890001	-0,000736215907176808	0,00320107555411598	0,00134618524134309	-0,00203530911754133	0,00126980864460079	-0,00177285891255722	-0,00100667844552393	-0,000163529110620159	-0,000456436833959101	0,000399376876911024	-0,000157988486096254	0,000887723171403283	-0,00109972370698241	0,000699550734860014	-0,000878684875351566	0	0,0185266034578586	-0,0409485799149272	0,00460486589922512	-0,0318301831044752	-0,00687918619874435	-0,0140808779394504	-0,0101591109930059	-0,00653898412110123	-0,00504704653729016	-0,000717638564952432	-0,000867589002325236	0,000862065676481101	0,00252374489478401	0,00101048030506484	0,000652383252058064	0,000930809996704424	0,00064531235449532	-0,00103834408210378	0,0023464110531166	-0,0010489731162847	0,00106957113073929	0,000150691772695125	-0,000972088005361467
Gcru Selce 2016 5l gedreht.cruentatus	cruentatus	1	0,0316910944744759	0,0350174488855295	-0,0159938786532659	0,0163592163430878	-0,0121438168860972	0,00521628062818223	0,000322943532027004	0,00456774045055035	-0,00219258991472842	0,0046986058106075	-0,0016711490390746	-0,00235648441105561	0,00113526187669548	-0,00184507587031781	-0,00162056668112237	0,000144821481271492	0,000321284806634518	-0,00197907949732701	0,000808165508775638	-0,000718811904934051	-0,000222289765743898	0,000688135733953231	0,000706895363743857	0	0,0279859107739232	-0,0582306575749924	0,0114447562659662	-0,0422078499864635	-0,0109079893016871	-0,0138832151720088	-0,0117110746536879	-0,00523818646737886	-0,0052363049899354	0,000126582373881419	-0,00230241939237037	0,00145256040068275	-0,000337655910455603	-0,000554570309966875	0,00471458902010683	-0,00131084036612825	0,00349208552479557	5.61742e+09	0,00211537114434956	-0,00123432624574818	0,00254581794606969	-0,000351383830050639	0,0010474651981231
Gcru Selce 2016 6l gedreht.cruentatus	cruentatus	1	0,0136374559982046	0,0292659185360662	-0,0160109419728633	0,00298346178198494	-0,00466729241462588	-0,00666198111592832	0,00288541519873798	-0,00177218251522234	-0,00185593277781546	0,00448225581471376	-0,00196145402643676	0,00182053435066342	0,000202363513819076	0,00130460476517351	-0,000579721834902177	0,00108495458466767	0,00107602133507967	-0,00162160504692323	0,00293665619408283	-0,00175776661981092	0,00174668808144707	-0,000996609825659126	0,000556761852157662	0	0,0155393875256191	-0,043564651009055	0,00623117904056272	-0,0376558089867362	-0,00509377615433475	-0,0171855866721985	-0,0103879347781589	-0,00837344361339517	-0,00293778967990163	-0,00435477265990941	-0,000976823468438717	0,0033460103295598	-0,000662733269752316	0,00219013885211098	0,000620994089733598	6.27334e+09	-0,00152638603365633	0,00190682531178817	-0,000333565714979934	0,000356193954451596	0,00153971833528764	-0,00112009663830806	3.51095e+09
Gcru Selce 2016 7l gedreht.cruentatus	cruentatus	1	0,0233240822018493	0,03938089031924	-0,019298484105558	0,014374453601604	-0,0121168445849974	0,00477593810041242	0,00119303003596329	0,00218563507789452	0,00289899479525276	0,00204435218061401	0,00187226573873974	-0,0027272352887338	0,000417087668472359	-0,00115889968180035	-0,00250846728906371	2.61837e+08	-0,000268760634988731	0,00041754921133105	-0,00140375056659826	0,00204295038028791	-0,00209416423503741	0,000911010238038893	-0,00135695898584595	0	0,0273707462315285	-0,0475344685005309	0,00344484003723923	-0,0287402888989414	-0,0118937788773893	-0,0168074524641849	-0,00794380899602553	-0,00907785829828357	-0,00562850097377015	0,00183976853597297	-0,00487961782508212	0,00225545486827923	0,00125215758957773	-0,00295254242837831	0,000989511690263072	-0,00082373484923416	-0,00129126535579648	-0,000209861332981402	4.5256e+09	0,000401013801007343	0,000279236658065672	0,000587169959420179	2.01628e+09
Gcru Selce 2016 8l gedreht.cruentatus	cruentatus	1	0,0486444351290486	-0,00997293698422314	0,000630626567836185	-0,019183437513918	-0,0177664966709224	-0,0143327772546085	-0,0139554252725814	-0,00574626161827064	-0,00905256291045235	-0,000847155928423278	-0,00281768106631293	-0,00164543587969077	0,00245161744040643	-0,000626148694227096	0,00213933005662725	0,00323297695775198	-0,00322748777179344	0,00426199545294178	-0,00411238556921793	0,00164597812036519	-0,000677050102791723	0,00179045278067027	-6.72275e+09	0	0,0273739013979	-0,0528938147862842	0,0219407908443802	-0,0356174102504465	0,0031177432713917	-0,0142460531340315	-0,00101902422090111	-0,00589509326895969	0,00208068658068492	-0,00307698971926415	-0,000540341600260353	0,00166806831361713	-0,000455494680060864	0,00250061516511209	0,00166590709581611	-0,000603440418887008	0,00119347257289804	0,00026017625879071	-0,00138277963315612	8.29175e+09	-0,00173444018313026	-0,00149886268040004	-0,00152952321638154
Gcru Selce 2016 9l gedreht.cruentatus	cruentatus	1	0,0477199949142836	-0,00509328566700984	-0,00648870892025377	-0,0159238213969415	-0,0117837357122393	-0,0169849650053356	-0,00262367772577294	-0,00984460905490737	-0,00603222615199055	0,00181566490565294	-0,00694716369336618	0,00180143612998761	-0,00156533772913026	-0,000871417067278095	-0,000215171630871138	0,00100694701981037	-0,00256789123357161	0,00216666020372966	-0,00197890688021902	-0,000416062588817793	0,000439398182993974	-0,00118194875940997	-0,000605044229266748	0	0,02019329551131	-0,0517759383790639	0,015450594546857	-0,0279306943622404	-0,00835653435328861	-0,00595142134408409	-0,0068976375572138	-0,00854862607612951	0,00515017856098962	-0,00776004364535199	0,00310894337472842	-0,000337107910361116	-0,0025783696454137	0,000516947282008691	0,000913741857750692	-0,00167622063868321	0,000650962649974629	0,00182707770895605	-0,00185141464765477	0,00191967894065885	1.6616e+09	-0,00117334887293587	0,0011819177817464
Ggen-1-re.geniporus	geniporus	1	0,0052023826198316	0,037618960363462	-0,024996106469737	0,0112490189359344	-0,0226282558461554	0,0038688862767103	-0,00581079110047475	-0,0020730484412394	4.66896e+09	-0,00346842882659454	-8.10766e+09	-0,000990596728764346	-0,0023394156975201	0,00103837708746064	-0,00282519150493856	0,00068102066299373	-0,000807889226229957	0,000191294144873934	-9.05437e+09	0,000850306707729168	-0,000265694539387552	0,0010459699704561	-0,000600455801409877	0	0,0149428393926293	-0,0301957047401114	-3.84088e+09	-0,0168688790828503	-0,0169810491548656	-0,00678323153619295	-0,0137984090601591	-0,00516037054433111	-0,00697160501390451	-0,00227715473065429	-0,00378279089196176	-0,000174514477254677	-0,00333314706231346	9.24473e+09	-0,00200085552516382	-0,000324526622407048	-0,000313370697586257	-0,000341261095543826	-0,000152278972494979	0,00130112139548327	-0,000567851242447265	0,0013808039860881	0,000347308995531495
Ggen-2-re.geniporus	geniporus	1	-0,000813347958264706	0,0275547574659756	-0,0323694713894332	0,00424192494749739	-0,0266352358828601	-0,000902270458302309	-0,00429003117283569	-0,00458378341939395	0,00363661973949483	-0,00227586585042908	0,00275349076531095	2.63763e+09	-0,000268049128159592	0,000266209907904982	-0,000255362585095873	-0,000244575547578187	-0,000576776096511741	0,000230967325649682	0,000389516732420966	-0,000767949552256551	0,00134058883245341	-0,00159141262917803	0,000724110333745951	0	0,00713115069313691	-0,025939968574282	0,00151306897014714	-0,0193558240433803	-0,0157018415764857	-0,00825065756666727	-0,0166690514608882	-0,00745464485284371	-0,00408312292627135	-0,0048296889130537	0,00057301049318016	0,00057531372175083	-0,000984421820334959	0,00145779612853849	-0,000580300029721498	-0,000636217376247899	-0,000970858171178946	-0,000941096714043279	-0,00164029979400328	-0,000592517186147786	-0,00150442848271181	-0,000639701822408974	-0,000257665236276066
Ggen-3-re.geniporus	geniporus	1	0,00182811498982566	0,0293879635742828	-0,0248924318370613	0,00502215900004642	-0,0192104156495484	-0,000925276922777875	-0,00353818443228097	-0,00531698491330226	0,00252215267413022	-0,00311345300579263	0,00418513110683993	1.98244e+09	0,00169166797299336	0,00130009187257957	-0,000547183214804021	0,00074955316108969	0,000616489990166431	0,000570126189846907	0,00207304572368431	0,000638644033043705	0,00165720569307338	-5.34093e+08	0,000244476644976901	0	0,0129831119067251	-0,0315928383675552	-0,00242890098470463	-0,0169594373658118	-0,0165010207582005	-0,0076738751252961	-0,0126873439783385	-0,00886866526981484	-0,0050696807629218	-0,00591856092748218	-0,00199204977126449	-0,00129327604116778	-0,000650547659382026	0,000444114799088017	-0,000869445210066375	0,000642209364083688	-0,00173438132721503	-0,000501362068696705	-0,000714689889551449	-0,00134632182968917	0,000233387882694927	-0,000249126687293595	0,000796577026783632
Ggen aug17 big no3l.geniporus	geniporus	1	0,0209366534255964	0,03567511155397	-0,0119188792685723	0,0104092207974368	-0,0116278087713473	0,00408559396189518	0,00185029912336493	-0,000491795865915004	0,00606026430634033	0,00065297737742607	0,00430400624537249	0,00188842228092532	0,0028759398926829	0,00148808959868644	0,0014299031271718	0,000903080364361559	-0,000596450441788518	0,00119309560363527	-0,000960142752075808	0,000711244955541158	0,000523844768779464	-0,00067789749495622	0,000893606066543451	0	0,0303254398284818	-0,0242728132594536	0,0092642382816388	-0,00893357536216421	-0,0128457792058565	-0,00480688100031469	-0,0138219822408061	-0,00569516108651571	-0,00642186399447032	-0,00331267765076311	-0,00186785668885822	0,000522230293948078	-0,000259677092293928	0,0019702888694371	0,000882334612346682	0,00117773552866418	0,00105832754799514	0,00130151797937424	6.13683e+09	0,00168296530889113	-0,000544241625092013	0,000399213596768068	0,000344562119332412
Ggen aug17 medium no2l.geniporus	geniporus	1	0,0209461975543573	0,037625159150915	-0,0112457535813063	0,0127926719429589	-0,0157336365609611	0,00486772703144964	0,000859720830567175	-0,00147542303651523	0,00744295516231509	-0,000706291350531878	0,00510909446784445	0,000767830519852201	0,00147947593042248	0,000710502495280647	-0,000925816115190746	0,000858227707097307	-0,00221678532821796	0,000960609083077413	-0,000839629529023791	0,000293467961060105	0,00076328264673618	-0,00030715095501934	0,000680421144060383	0	0,0258317870699345	-0,0274038656994033	0,0120412525112995	-0,0181619135974021	-0,0105689068924828	-0,00826173945223682	-0,0140287390018725	-0,00806486342700483	-0,00801469067156638	-0,00419442975517509	-0,0044014591371637	0,000846178087489652	-0,000998829067651936	0,00143963554109035	0,00204583296383516	-7.26036e+08	0,00162408466081974	0,000357465627998743	-0,0012702948078825	0,00130214521758822	-0,00202316595636924	-0,000548305427464895	-0,000276132195603598
Ggen aug17 small no1r 1.geniporus	geniporus	1	0,0265179582671443	0,0345193965022094	-0,0154797512275756	0,0172165710577306	-0,0215949856072256	0,00841531827851189	-0,00330782461709137	-0,00240804162020752	0,0053232307288966	-0,00175891875961117	0,00214534326173368	0,00204283390129366	0,000175582260698835	0,0020052924429341	0,00189335366511808	0,000998361524308845	0,00154034042171465	0,0016822682804049	-0,000156636211148327	0,00113528948505629	0,000761110930276278	-0,000671711623454741	0,00126663153872612	0	0,0127248687082035	-0,0272502365481182	0,00352017037930226	-0,0154588911612549	-0,0128014440615491	-0,00662316964957555	-0,0109868207545584	-0,00662208441568985	-0,00232719886170631	-0,00499245644019872	0,00024608787301468	-0,00112101432768155	-0,00022666472977713	0,000575183603928862	0,000724339802723995	-0,00041013993250146	0,00104248603897221	-0,000273840307759591	-0,000323028215205476	0,00131515439646718	-0,0010637306656869	0,000519192525026637	-0,000629771451214583
Ggenmon-1-re.geniporus	geniporus	1	0,0079758083066382	0,0178141793285237	-0,0166379781267475	-0,00328279141037708	-0,0305007526057136	0,00157210654321627	-0,0124764493493311	-0,00412062654400083	0,00208124337667211	-0,00232548092613857	0,00143715611060094	0,000298057031371479	-0,00117296255598153	0,0016438645426992	-0,00286485317610002	-0,00151084403418387	-0,00234553678729919	-0,000716558594449261	0,000327229180510723	-0,000156128311690453	-0,000367318717270115	0,000720532781889884	-0,00145959946970864	0	0,0395650982592355	-0,0301005466351475	0,02385007535038	-0,0236867647585749	-0,000580289789664073	-0,00949795676784695	-0,0112887948431753	-0,00192420246499766	-0,00946341318499722	-3.12364e+09	-0,00514445998886585	0,00102712390738984	-0,0018448602441719	0,000535086266507526	-0,000671426969919556	-0,00140714734523906	7.78711e+09	-0,00150690091979919	-0,000853900976746827	-0,00152004736606033	-0,00149700408964515	-0,000421837936088275	-0,00187770400149621
Ggenmon-2-re.geniporus	geniporus	1	-0,00305844170592146	0,0115026378016977	-0,0235952558128529	-0,00108865959422619	-0,0261572003855245	0,0056580468878833	-0,0080400549689095	7.86042e+09	0,00491581147825564	-0,000178775899961445	0,00454201271691816	0,00319789392022403	0,000114490839062225	0,00368621950955997	-0,00305362305497692	0,00284778667162627	-0,00311223844669368	0,00161795831941174	-0,002125880760635	0,00163542756835778	-0,000764568085392378	-0,000352389084784546	-0,000553078455686519	0	0,0272801421358994	-0,0259192460971605	0,015364149598185	-0,0215067495344579	-0,00188040900848275	-0,0115668402999659	-0,00996019590200322	-0,00265408948478926	-0,00859960479261064	0,00131417342341958	-0,00324596146254575	0,000764269249051468	-6.59501e+09	-0,00108632357085549	0,00160478944151234	-0,000561007094512446	-3.35654e+09	-0,000601070820335663	0,000670226412091669	-0,000836680989104633	0,000559476471933358	-0,00168513862488884	3.67357e+09
Ggenmon-3-re.geniporus	geniporus	1	0,0328434561856161	0,0229388742384427	-0,00808789490822826	0,00931667657008829	-0,0206713914240291	0,00809926571928982	-0,00747045154060122	0,000326718629658214	0,00411953258821019	0,000244443865323081	0,00534759261357712	0,00209755168667328	0,0016831486438054	0,00241217925449758	0,000829132064285029	-0,000172003649521337	0,00104769974660577	-0,00129194058882414	0,000379163334562043	0,000338323020149726	-0,000452352474716629	0,00157382666821579	0,000218184364127609	0	0,0314974983775542	-0,0368393997414617	0,0244674012216882	-0,0224711365022546	-0,00150689933993154	-0,00603044218199167	-0,0100447993739573	-0,00466575513285453	-0,00651257254908421	-0,0046084309061874	-0,00156912099822642	-0,0018251744606906	0,00101007372476831	-0,000736207014963402	0,00251554744377572	-0,000723701892985403	0,00293172436299134	-0,000976530719467634	0,00171538359322814	-0,000648289099570708	-0,000333990027625766	0,000574849845885079	-0,000917494293998991
Ggenmon-4-re.geniporus	geniporus	1	0,029880193083547	0,0173827540865305	-0,0184879244134453	0,00704890805967324	-0,0286207077585821	0,00610327085084487	-0,0110013367029563	-0,00283054726002399	0,00277000443034885	-0,00394162209321923	0,0033765059598598	0,00093707637837779	0,0015186815144688	0,00186831525765299	-0,00150198483538458	1.91323e+09	-0,00183022548979943	-0,00021258593185582	-0,000815648789788832	0,000113862928680071	-0,000693431440551917	-0,00145862853372917	0,000514688095552152	0	0,0278117956472263	-0,0371992692898166	0,019798662884412	-0,0253101533084975	0,000559941953973797	-0,0113573803277259	-0,0106166597459143	-0,00334401644727565	-0,0111988807815878	-0,00390178618141257	-0,00436968142841529	-0,00264913614404681	0,000876293916626442	-0,00209541709031806	0,00220321350237545	-0,000330797609396092	0,0020791563823152	-0,00101682315691659	0,00222498235123271	-0,00166195033496646	0,000665534604015619	0,00039466179145659	4.94817e+09
Ggenmon 1l gedreht.geniporus	geniporus	1	0,0144314695533774	0,033737148376325	-0,0242440356771622	0,00697124657194466	-0,0270771851145462	0,00171467059802534	-0,00576322058429648	-0,00675886271709377	0,00542987313383129	-0,00425780494324923	0,00302300758285857	0,00043703145766553	0,000373178327163793	0,00349121676326931	-0,00135657449198443	0,00169557978542482	-0,000206052665496361	-0,000536053995418309	0,000782467097227878	-0,000845163200319366	0,000308898793339223	-0,000951116838692402	0,000154103429719619	0	0,0026838737737761	-0,0342942414831116	0,00770240134360906	-0,0188305493077285	-0,0104701785288546	-0,00859513515135185	-0,012117243480004	-0,00811429102900104	-0,00578140069728446	-0,00494225951267627	-0,00152357038779384	-0,00108002824099361	-0,00118942447604427	0,00112846587139163	0,000336532862231447	0,000552856944179476	-5.845e+09	-0,000391132844101569	-0,00176468032214743	6.21026e+09	-0,00145488881963073	-0,000620143895798324	-0,000136724819131856
Ggenmon 2l gedreht.geniporus	geniporus	1	0,0227675823076381	0,0307238069851866	-0,0258205116022905	0,0122523893526642	-0,0288945968402329	0,00113208497450939	-0,0092750526670781	-0,00539830568062925	0,00115856477775139	-0,00177222656148412	0,000218916395337063	0,00218857113758959	-0,000865820790292396	0,00225251155862485	-0,00200118492180153	0,00292817999357152	-0,00342147366239543	0,000745086003845929	-0,00172054830723926	-0,000377575183024936	-0,00134663152165428	-0,00031393522652157	-0,00139985323139508	0	0,0250901462698215	-0,0333336954913181	0,0188958159631037	-0,0200429753734151	-0,00183037578398558	-0,00330325730981407	-0,00844664267715338	-0,00243303994447359	-0,00424919828885309	-0,00529124218538571	-0,00126815346249489	-0,00278388907290286	-0,000259182364589326	-0,000650845898771453	-0,000512432180720958	-0,00010776671309935	-0,000546331629255247	-0,00104170960252289	8.93826e+09	-0,0015152931570999	-0,00010710859666375	-0,000671962250797267	0,000850009469592544
Ggenmon 3l gedreht.geniporus	geniporus	1	-0,0001406820545257	0,0403092582028343	-0,0258158745397757	0,0106581807662967	-0,0134969355016593	0,00244846702153037	0,00233002747728105	0,000943340372586581	0,00335301232789489	0,001859127846614	0,00313503129172507	-0,000115619778008758	0,00269610873898193	0,000482329381664856	0,00118487884826166	0,00172984761558828	0,0017776408959867	0,000580675058836278	0,00177085130884826	-0,000495031303067202	0,00119000227079831	0,00018798489096057	-0,000248489339821494	0	0,0109364914642427	-0,0291421709246962	-0,00565563752889692	-0,0144570449140029	-0,0199188173526021	-0,00853686906546175	-0,0131990493379841	-0,00900593337325053	-0,00277573601623494	-0,00470753408761728	0,00175958482652258	-0,000104436171347669	0,00101669490218664	0,00252257408242056	-0,00210011471570367	0,00140730554198489	-0,00164873611341942	-9.8438e+08	-0,000757209617800452	-1.62167e+09	-0,000244286676305737	0,000645625496710038	0,000188823413092785
Ggenmon 4l gedreht.geniporus	geniporus	1	0,0248245092835915	0,0174773023239722	-0,0266378580050062	0,000301491344708003	-0,0365182364820977	-0,00193800890807988	-0,0142382809410571	-0,00798193448729731	-0,000984953994743966	-0,00401060881292797	-0,00167309200498937	0,0021409537881	-0,00326080522947227	0,00170887613226206	-0,00359109280593671	0,00024303177075023	-5.03835e+09	-0,00230029435632269	0,000137226846800057	-4.31713e+09	-0,00109831662240266	0,000756409094892501	-0,000167189448717684	0	0,032664187314943	-0,0365669856158446	0,0256015703464051	-0,0180062749499183	-0,000853626143130691	-0,00561924140521587	-0,0122095280350031	-0,00126448433680873	-0,00909394918068862	-0,00163252087852132	-0,00391525536712618	-0,000869269100282627	0,000933745866284977	-0,00263410960807797	0,00350788122962896	-0,00169951617034402	0,00237222369220155	4.80408e+09	0,000686893322472665	-0,000145193998207656	-0,000366811076879684	0,000446735665557167	-0,00069931640590066
Ginc J1904 l_160118.incognitus	incognitus	1	0,0130231515573501	0,0328719760348298	-0,00210590288245999	0,0193039595611166	0,00119081210384479	0,0114298345772188	0,00564807610298644	0,00367589295908542	-0,000145584915893056	0,00131334879276059	-0,0021054301587608	-0,00199145090220515	9.14979e+09	-0,00375097678514133	0,00206910886544652	-0,00224962121670146	0,00127333717765164	-0,00170049504091426	0,000110062311591765	-0,00137565151504818	-9.85748e+09	-6.02688e+09	-0,000778191955810178	0	0,0316857029449138	-0,0487167278963506	0,0177268938157132	-0,0368348042187055	0,000275395383225294	-0,0168163213419551	-0,000413777154813033	-0,0073959096757753	-0,00151053116313036	-0,00250768178818983	-0,0057784453263366	-0,00165248747071234	-0,00495566854159444	-0,00158211067112945	-0,000361959538589935	-0,000402185855971973	0,00123405057851302	-0,000181251752223986	0,00080899056142777	-0,0012146476075557	0,000584786981376891	-0,0014282920015856	-0,000643096664260749
Ginc J1904 r_160118.incognitus	incognitus	1	0,0172718201362369	0,0351637601648961	0,00635220459796737	0,0158743083429321	0,00577865923168856	0,011851935227301	0,00881655663127947	0,00248918719956415	0,00493910790855058	-0,0013949091356715	0,00320746854237895	-0,00563957438390433	0,00554619462138168	-0,00575054031947895	0,00671041898298093	-0,00309632762314021	0,0021826320081723	7.2583e+09	-0,00115538756086267	0,00140370895829444	-0,000728196940568155	0,00115708566006574	0,000753128233754223	0	0,0207047183752937	-0,0362100010564495	0,00774126173630053	-0,032909681606973	-0,000716719695035499	-0,0166776285628282	-0,00130695100957375	-0,00631753405515432	-0,00142394318963069	-0,00162397029466745	-0,00509061826960747	-0,00180676879470025	-0,00365211275282068	-0,00309501331000043	-0,00102188292067361	-0,00308063135515618	0,000776749719366016	-0,000863431664406477	0,00110117389279164	-0,000128534336262868	0,000568491424485887	0,000689710583217777	-3.23519e+09
Ginc J1906 l_160118.incognitus	incognitus	1	0,0296581950146678	0,048941805427841	-0,00570027216095531	0,0298478096693916	-0,00126497005805053	0,0191703526451862	-0,00116546494571997	0,0102482596168394	-0,00193195948332524	0,00259209113811371	-0,000529511173286883	0,000487631550471272	-0,000427528621327797	-0,0004371494909821	0,000373958217651153	-0,000413838061228529	0,00069886533762611	-0,000333223968061627	0,00103761807985408	-0,000700760443262837	-0,000126645252623737	0,000249782950409692	-0,000732211195105328	0	0,0125706224491664	-0,0412629078384833	0,00559703025777057	-0,0276559306248181	-0,00129407446667067	-0,0124126617426554	-0,00395682455619801	-0,000217286988510453	-0,00488465487685123	7.09777e+08	-0,00101706035936305	-0,0040966239798741	0,000896952298068276	-0,00229205229735756	-0,000187726135755522	-0,00160378293257	0,000449817147428307	-0,00270682103248682	0,000614512524513721	-0,00153966954431669	0,000309119346143042	-0,00073091171127454	0,000338508506087074
Ginc J1906 r_160118.incognitus	incognitus	1	0,031282553470412	0,0476526566357505	0,0119146567677719	0,026770256569137	0,000468214910954343	0,0205045778788725	0,00031409058875749	0,00844445731954456	-0,000872693410487916	0,00380926975200509	-0,000511722435329826	0,00116648204709475	0,00274546919044165	-0,00106440990217941	0,00355117063581855	-0,00158677544202191	0,0021447475227337	-0,000853659041285956	0,000750243032628951	0,000905631700361551	-0,000257432136250482	0,000636746605553736	-0,000180662583464331	0	0,00587247750948653	-0,0395868471950844	0,00604745918327597	-0,027665370476164	-0,00125271619188335	-0,0089268031035159	-0,00477942492882654	-0,000226430393796891	-0,00276459465644457	0,00158945478769919	-0,00303874677070641	-0,00136837207755848	-0,00263369167661249	-0,00108125164103911	-0,0018116664972135	-0,000777091397621052	-5.03428e+09	-0,00146891562185462	0,000594827783083875	-0,00142739586741608	0,000413592128573873	0,00047233151471787	-0,000744761561465712
Ginc J1907 r_160118.incognitus	incognitus	1	0,00677565479716818	0,054879637540589	-0,00864759019522131	0,0382259632178802	-0,00537573761745481	0,0227421822995546	0,00417268699573186	0,00530618154497424	0,00483217056225179	-0,00122030854977003	0,00152575738442973	-0,00135419125880223	-0,00192116386898989	0,000675695887358962	-0,00308910426120548	0,000422206168190963	-2.7265e+09	2.95678e+09	0,00114420349487652	0,000555178197325785	0,000105449129589016	0,000602936145475657	-5.33818e+09	0	0,00947807140326017	-0,0374122808802057	-0,000107887675067514	-0,0237640454419814	-0,00754325951266869	-0,00497418253731464	-0,00124070212718661	-0,00166807513726458	0,000286038888873965	-0,00297410074916686	-0,00226806407058128	-0,00318904369221763	-0,00129861119253271	-0,00205699688154191	0,00108463746410292	-0,00053869290975578	-0,000188930387163606	-0,00076106550501597	-0,000320244706730671	-0,000508249042383815	0,000944375510142596	-0,000177339869407518	0,000399326582739636
Ginc J1910 r_160118.incognitus	incognitus	1	0,00772448524549978	0,0618440001614255	-0,00450691695036083	0,0388239072392284	-0,0025381185087381	0,0208986089408641	0,00315987615495599	0,00430955430675407	0,00266484119505648	0,00196226175096848	0,000578880603093956	0,00270171655127402	0,0018805716229436	0,00140104865634113	0,00110421498893895	0,00102388994275505	-0,00136745955021438	0,00146160957306813	-0,000592403019983961	0,00117378281456485	0,000405082468303013	0,0009196443341737	0,000555961860754491	0	0,0105848143435461	-0,021890127684925	0,00926653647632323	-0,0185315941004918	0,00238749156384125	-0,000303364716895258	0,00306349394997081	0,000886091755359321	0,00313152492434548	-0,00206104728345722	0,000186534973985179	-0,00184015347001414	0,00195289650488761	-0,00204697712730084	0,00200647966998849	-0,00137999329877854	0,00125167765517009	0,00019862953112971	0,000313458518801939	0,000918795019338427	0,000295122040469249	0,000300319183920167	0,000778085847569786
Ginc J1911 l_160118.incognitus	incognitus	1	-0,00696554985741206	0,0589730304238397	-0,00939579355757133	0,0337616933916934	-0,00291362111029224	0,0202849808964355	0,00323421971195712	0,0031476236558962	0,00275611209141792	-0,00185131718441217	0,000470678936640315	-0,00136269929665533	-0,000991592016804544	0,00109295864917158	-0,000524234925464873	-0,000244223641368832	-0,00151945042407224	-0,00127209628018544	0,000344014460784413	-0,000601423954036605	0,00108718169569031	0,000686791422494746	-8.90454e+09	0	0,0190369591338198	-0,0365199606706822	-0,0016970530028623	-0,0278079604513868	-0,00864660800894577	-0,0052354070178494	-0,00425478725969993	0,00127707787105416	-0,000370544904404268	-0,00382657520951851	-0,000223716268994638	-0,0057669234109712	0,00167072117033641	-0,00256307317501651	0,000230365036635408	-0,00200206162747721	-0,00102922887257889	-0,000356741314161753	-0,000691342704791791	0,000114142982485681	0,00135385737851074	0,000216033758918767	0,00134652229364196
Ginc J1911 r_160118.incognitus	incognitus	1	-0,0117030176163965	0,0510121364573086	-0,0173542839116778	0,032513351380079	-0,00683138133646077	0,0184589903699889	-0,000459261457750606	0,00336291624368936	0,00163103911737277	-0,00271044145908502	0,0018475529710502	-0,00237906824443887	-0,00106254467389671	-0,000813942527164717	-0,00197510207772147	-0,000988860327308843	-0,00205476818505765	0,000576809206908403	0,000596674003832883	-3.97637e+09	0,00166230330132707	-0,000330937431120957	0,000596643287461843	0	0,015899652532521	-0,0480009733027462	-0,00184434252769652	-0,0390213398296071	-0,00911429064250336	-0,0114887494681986	-0,00539023554195124	0,000344632327542982	-4.05214e+09	-0,00208495096723424	0,001989097493144	-0,00262824807462411	0,00241489427011187	-0,000982064516308851	0,00108962281106679	-0,00163610597138317	-0,000611173190383405	-1.57539e+09	-0,0021610582967688	-0,000649310434815903	-0,000882105387062307	-0,00168146894783053	0,000642285218234823
Ginc J1912 l_160118.incognitus	incognitus	1	0,0209364620175984	0,0499122237590074	0,000888814363404006	0,0228018779316251	-0,00285413173093972	0,0173046968064734	0,000681891575023829	0,00809168187900254	0,00156401525770009	0,00214717196678016	0,00159350832637159	-0,00120146286120771	0,0028045517839484	-0,00160565131589426	0,00341115645820761	-0,00060335386666554	0,00220700467098176	0,00078645799192327	0,000254889600837299	0,000812985845661247	0,000210518015282692	0,000243820234437222	0,00106776152650215	0	0,00578672254616171	-0,0312007314711408	0,00515078202065639	-0,0297286522805474	0,00148099487281856	-0,0125664218933673	-0,00230820997113088	-0,000513058446564104	-0,00288556970391163	0,000988074429141792	-0,00228493295424028	-3.95628e+08	-0,00143830434341012	-0,00118356141960443	1.1237e+09	-0,00124088911642382	0,000439846273814656	-0,00103536012912292	0,000589470834132747	-0,000903217907559446	0,000296173386470096	-9.98601e+09	-0,000203004857975601
Ginc J1912 r_160118.incognitus	incognitus	1	0,0106973363707542	0,0502677887893139	0,0013238207293566	0,025614140778774	-0,00180006265702774	0,0195962956865381	0,00203090802952676	0,00590309167729938	0,00335176725316845	-0,00147434659381899	0,00360895435679361	-0,00185625569443952	0,00346895750716869	-0,000482341922487877	0,00265308617945083	6.85672e+08	0,00215455687498708	0,000277523287794193	0,00134807420784054	0,000579290284736152	0,000343976596529629	0,00122874589079426	0,000108469834158806	0	0,0100198722422118	-0,0373927218705104	0,00530936887954027	-0,0310822685001061	-0,000536680952539117	-0,00985871893657709	-0,002564600453903	-0,000169911788486303	-0,00161355066488698	-0,000311932499348095	-0,000699529411447517	-0,000510770949083344	-0,000668930134036166	-0,000531080580179473	-0,000158727061917259	-0,000693636383139338	5.07682e+09	-0,00108508923239258	-0,000406576526834613	-0,000716706200409702	0,00031681056445557	0,000213570109982318	0,000569841086031024
Ginc J1913 l_160118.incognitus	incognitus	1	0,00963536924969622	0,0406815822800636	-0,00969036650060391	0,0271875197467495	-0,0126545224904283	0,0188768850262605	-0,00331847444412377	0,00778377644519302	0,000910591911476475	0,0030802604698055	-0,00251001819490678	0,000532151564249424	-0,00199729367657986	-0,000745162715940559	0,000701861429866299	-0,000644277129937391	-0,000525965986530454	-3.02207e+07	-0,000772913048120192	0,000243411852203117	-0,000537702293890501	0,000588339914847281	-0,000518757588533474	0	0,000536164571472621	-0,0318986769789484	-0,00114527865226391	-0,0309828247210284	-0,0080974792327554	-0,0140790812696338	-0,00694700329119704	-0,00269244710774883	-0,00343068631196904	-0,00135709807261305	-0,00267692247281043	-0,000769564749620744	-0,00138548530871653	-1.36274e+08	0,000306650713050627	-0,0011483441854482	0,000710830524258657	-0,00206382552272786	-0,000217346611304032	-0,000918049188991971	-0,00098956320572841	-0,000707197705039507	-0,000408452120061454
Ginc J1913 r.incognitus	incognitus	1	0,00887888015812863	0,0436244329141359	-0,00525008307010864	0,0205892050573891	-0,0137718427533509	0,0181646924314746	-0,000444959918679971	0,00428492300247093	0,00110064265874015	-0,000561674533160165	-0,000849267345696388	-0,00230630312369933	-0,0022255237535896	-0,000406215687122332	0,00164968147990097	-0,000301984435763408	-0,00197078801325373	-0,00135635849770501	-0,000908273899789635	-0,000352804151703528	-0,00111113346791282	-0,00137827614257776	5.6621e+09	0	-0,00292821985879552	-0,0369765138160233	0,00207975993601015	-0,0356378825928151	-0,00701664119157729	-0,0183128911561425	-0,00570668166946967	-0,000591066723343971	-0,00474222755214518	-0,00176879698624974	-0,00210621706276804	-0,000559045203537078	-0,000994023640518992	-0,00229050875444814	-0,00158482602459776	-0,00101640370575644	-5.87648e+09	-0,00186463770625665	-0,000379186780760756	-0,000980185065378679	-0,000194235208317449	-0,0011475126609359	-0,000638358644729028
Ginc J1914 l_160118.incognitus	incognitus	1	0,00342168789603654	0,0585150188412615	-0,00619689726387249	0,0345063602511561	0,00287224094817957	0,0193049756611901	0,00568885437905803	0,00626468474848385	7.63298e+09	-0,000510010572533983	0,00268134830194601	-0,00116189608751754	0,00241500375878896	0,00146580747035529	0,00147587639489244	0,00210654604477559	3.9285e+09	0,000343969119566021	-0,000123776225323629	-0,0010733160932856	0,000619229684848982	-0,00104920702378755	0,000873238651111023	0	0,0199756988554514	-0,0399078274782661	0,0101641527418558	-0,0324290530473331	0,00465614563301606	-0,00769075327603397	0,00311189189065466	-1.56029e+09	0,000566265236184888	-0,0010665380795308	0,000557510842927679	-0,00341684417838204	0,00170872067874046	-0,0019773538159717	0,00070887022121806	-0,00166137476370845	0,000870317423985342	-0,000161699887912876	0,00110893301736482	0,000679037606050978	0,000751461346040544	-0,000271797176635054	0,00103161964714965
Ginc J1914 r_160118.incognitus	incognitus	1	0,00364842162585316	0,0509046368229656	-0,00428444037558787	0,0285546042948062	0,00209191255578522	0,0172439669564393	0,00393472781482744	0,00250836835271088	0,00071481079193739	-0,00484274820921731	0,00367634454201185	-0,00482331759037244	0,00383264174049377	-0,000665119977940236	0,00182660433425061	0,000347346339256022	0,000598247660459404	0,00174614663228858	0,00057691202138663	0,000327114319274129	0,000950820471222506	-0,000645138936933991	0,00134627464429565	0	0,0212746230830679	-0,051138393341689	0,0103773661840793	-0,0416630211830989	0,00270721375730918	-0,0103517293945236	-0,000573627031989944	0,000342918610096651	-0,00245830889763921	-0,00161371265822361	-0,0033927747029518	-0,00363991485523061	-0,00112138105066326	-0,00254007396232613	0,000453885376553727	-0,00149074074197048	0,000816123127515559	0,000408678196559857	-0,00172123936388169	0,00126426585240412	-0,000488062464818742	0,000768856708131099	0,000345530390353327
Ginc J1931 r_160118.incognitus	incognitus	1	0,0108668701125897	0,0390998507751077	-0,00514956504915123	0,0238826208268489	-0,0102081404175992	0,0174976332687061	-0,000655673219058372	0,0053453971565418	0,00241242385135746	-0,000654693128171328	-0,00174088665485496	-0,00182887542563701	-0,000791019122865492	7.19261e+09	0,0011769547715629	-0,000316885207019829	-0,00106708787273445	-0,000814211845342749	-0,000980565580393273	-0,000567702388672736	-0,000348713602147606	-0,000609256069885567	0,00013652133475947	0	0,007314969742396	-0,0351818334818933	-0,000154995645556636	-0,0371305643647293	-0,00411484331372708	-0,0164907305097664	-0,00576553073116919	-0,00124695064597362	-0,00385492218283028	-0,000705840444928855	-0,00263584987472758	-0,00202622651852286	-0,00121961854734003	-0,00132186160134614	-0,00130241352631836	-0,00178290010330399	-0,000596699013295665	-0,00169776922215142	-0,000253640903499503	-0,00162970873850993	-0,000935019813390222	-0,000989159463233949	-0,000201757949604855
Gnig-1-R,Pilsey-Island_OK.niger	niger	1	0,0336888152323521	-0,000260634609651755	-0,00863960596787609	0,00373613950020338	-0,0188890531207839	0,0120737538926025	-0,00672320386261972	0,00179483057797642	0,00296074341226737	-0,00400850549777054	0,00126075249692952	-0,00253495748479078	0,000872912283511845	-0,00182952438856132	0,00356231744503567	-0,00100764380541781	0,00248782909498748	0,000683042430777691	0,000625536169582709	0,000468553816893141	-0,000682066883754578	0,000187992233588013	-0,00151502193776653	0	0,0144699974819346	-0,050355945036352	0,0172517093476255	-0,0522385159686982	0,0084270019559714	-0,0246322838985141	-0,00266996868693621	-0,00324101430425604	-0,00449329418356731	0,0034711083670615	-0,0035120646724477	0,00115604781741884	-0,00115665245040895	-0,000476709356403015	-0,00193943102030599	0,000556858837740065	-0,00158595102230858	5.15505e+09	0,000324144968380384	-0,000555643407842781	0,000763081964117699	-0,000445275105173411	-0,000418181423466467
Gnig-10R,Pilsey-Island_OK.niger	niger	1	-0,000835143262995534	0,0353201414069061	-0,0106379129488665	0,0399787360802667	-0,00975405851789547	0,0238155381220909	0,000178377500726161	0,00386840533057636	0,00256919653944084	-0,0014461712387811	-0,000825565871821503	0,000963259257819401	-0,00216641160938236	0,00254317370367372	-0,00136161726395534	0,000302891155967175	-0,000137479450965087	4.52404e+09	0,00117153108837272	0,00109157830384318	-0,00111624439790179	0,00105262672639008	-0,00244962762183286	0	0,0130120641630247	-0,0336510336500941	-0,0119689461652279	-0,0166512712695629	-0,0157674722660234	0,00553413555482361	-0,00498001986364328	0,00297292165821523	0,00275420830786454	-0,00387847937388657	0,00213000158708573	-0,00182492360335563	-0,00177213039907869	0,000386286043022294	-0,00333838724527901	0,000979106605297379	-0,00217783312205041	0,00208195342972383	-0,000715899714390545	0,00128733549797279	0,000930817740621244	0,00073146276498041	0,000915774871016016
Gnig-2-R,Pilsey-Island_OK.niger	niger	1	0,0246566556504502	0,0220647170353773	-0,0276665681942187	0,0245152311675475	-0,0228818489811241	0,0131199521697532	0,001037136654027	-0,002336057807311	0,00682478892621407	-0,00348924172339111	0,00172608394312907	-0,000979066154676076	-0,000999565923859069	-0,0001608009308314	-0,00201454296081822	0,00157885585173751	-0,0017855533580841	0,000703438000163717	0,000165494360703134	-0,000389332455986598	-0,00095451647440671	-0,000498056099816154	-0,00146382500953794	0	0,0145389501519455	-0,0439934415507305	0,00681933016174057	-0,026439950024476	-0,0154060111612471	-0,00802190835741146	-0,0127501451609702	-0,00588002245320576	-0,000687378855454048	-0,00465661083368493	0,00228543078873999	-0,00249965820304919	0,00130928946223565	-0,0012081466861154	-0,0010467138907369	0,000626573549044996	-0,002183531544102	0,000332741698390629	-0,000210743947081572	-0,00191756502542878	0,0017382912470465	-0,00239338226265808	0,000320146699692328
Gnig-3-R,Pilsey-Island_OK.niger	niger	1	0,024797276358079	0,0395110205812498	-0,00314370494422186	0,0344639005742255	-0,00859224546286201	0,0235616671138384	0,00373051901486904	0,00445070301154002	0,00515628872311313	-0,0038832368246501	0,000999532534566128	0,000777649023156395	-0,00133720267967424	0,00258921142679643	-0,000508766660168094	0,0022735425842625	0,00191725471902401	0,00147807466818338	0,00134023452750492	-0,000741993509039326	-0,00075616039178497	-0,0001398687684093	-0,000992455600381654	0	0,0146381672309683	-0,0476135848004155	0,0107813374706942	-0,0315324835801359	-0,00360483077393388	0,000847869174663882	-0,00768152813635435	0,00762785004547329	-0,00092402535739098	0,00192947990565205	0,00206508021241829	-0,000854665556226045	0,000341214775841265	0,000300061785641487	-0,00076635817267891	0,00201851255609285	0,000175133145287159	0,00197545079264046	0,00269935778541992	0,00202062193614828	0,00127844910391385	0,000576863573010717	-0,000113183344806938
Gnig-4R,Pilsey-Island_OK.niger	niger	1	0,0165905223552137	0,00922622680626102	-0,00644384355597545	0,0136787781405259	-0,0144058515558222	0,0155676095596214	-0,0035707542357302	0,000723164321235903	0,00339735577023128	-0,00611420770454394	0,00177193334507098	-0,00517917930178547	0,00113220468861359	-0,00251941024473402	0,000466973672401187	-0,00184761486692839	0,000961964735108918	-0,00139701332108109	0,000263295218144779	-0,000793286641967031	0,000429855750563061	-0,000620296266116577	-9.63319e+09	0	0,0185258901322488	-0,0440043931287368	0,00407493184811583	-0,0434283293169233	-0,00290510697152263	-0,0149438362456727	-0,00649264980285983	0,00331556603647235	-0,00536221664114266	0,00209400192282746	1.85556e+08	-0,00213627783531464	0,000572015033443457	-0,00227779345109647	-7.76126e+08	-0,00146849575146972	0,000422779380779905	-0,00232690080307967	0,000900970535681348	-0,00161948205771063	0,000502951570636273	-0,000438347519794159	-3.2037e+08
Gnig-5R,Pilsey-Island_OK.niger	niger	1	0,0225155494272227	0,0297573513336332	-0,0171798969087489	0,0342441771242967	-0,0142479937277597	0,0177540813091313	0,00336418709233113	0,0024696193229328	0,00813352137758436	-0,00184526650447846	0,00500528933908655	0,00032099805583639	0,00137063712163639	0,00153843388746833	-0,000255558397703425	0,00119931900882312	-0,000406134298010313	0,000996584614995816	0,000422808847331921	-0,00104750772455608	0,00197522376257755	-0,00117092698991511	0,000537550972523932	0	0,0155539891342548	-0,0510295867482964	0,00817867009095329	-0,022155967530153	-0,00618813038630751	-0,00233493576691715	-0,0044382931906909	0,000268171814787576	-0,000699528577023592	-0,00207518053906756	0,00619189752733047	-0,00471436667692858	0,00483236997448442	-0,000585444561067728	0,00123873279134629	0,000874849729062282	-0,000819536328838449	-4.93774e+09	-0,00017670605163968	-0,00124933647773444	0,000855158178891273	-0,00070129748072081	0,00085751564687489
Gnig-6R,Pilsey-Island_OK.niger	niger	1	0,0353177816893832	0,0285341007694784	-0,00234262339873888	0,0311462143005754	-0,0146911066023295	0,0190088464536191	0,00117386021767775	-0,00107978663322154	0,0100652885706594	-0,00437317060507881	0,00423899856443142	0,000854219031622894	-0,00135475655361317	0,00229331518946217	-0,00146479736706955	0,000857941481886838	-0,000156549146541697	-0,000345005150243349	0,00068452579694588	-0,000875981095739017	0,00162550447429732	0,000238505760534956	0,0012674456142693	0	0,0100691936923194	-0,0463026859394852	0,00536239444272809	-0,0298241116626904	-0,00908197845874157	-0,00387686607297103	-0,00878380677110464	0,00530464482571147	-0,00186998786018881	0,00232594537416718	0,00138462887911239	0,0015604854132454	0,00159165072890526	0,00040393215850549	0,00211037623190478	-0,00194732036444225	0,000940670824688739	-0,000368493395281508	-0,00076873632545116	0,00117376882626452	-0,000716109044273974	-0,00055180762521651	0,000923981272152932
Gnig-7R,Pilsey-Island_OK.niger	niger	1	0,0219019325036722	0,0434494747605374	-0,0157889946711107	0,0425943604264898	-0,0150017000726057	0,0210315096173312	-0,00488572543240853	-0,000578806183273345	0,00124003441706453	-0,00367808155459087	-7.50627e+09	0,00161062415639594	-0,00332404497548042	0,00348233721443836	-0,00433661751607136	0,00205710210925995	-0,00132330306055557	-0,0010210253770709	-0,000385937314837564	-0,00154115934760979	-0,00259716688523363	0,000458074753439888	-0,00155716711818292	0	0,0119482060765412	-0,0351474067697577	-0,00102363775092686	-0,00743137619424439	-0,00948024296105593	0,00578916055406211	0,000562679834322851	-0,00187696551069211	0,00675919707844565	-0,00442137951565152	0,00392691592740772	0,000574727602240153	0,000878213580735539	0,00232220183914821	0,000967681508703007	0,000405168749900664	0,00120882963580455	-0,000748862775874294	0,000960988811279215	-0,00153276269265613	-0,000317365497560369	-0,000602019603155277	-0,0017809435733291
Gnig-8R,Pilsey-Island_OK.niger	niger	1	0,0316933760779053	0,0266599667771924	-0,0263878279311021	0,0279075061459226	-0,0299453458055761	0,015910986830578	-0,00184512908531133	-0,00087817928798751	0,00871533378701122	-0,00345813321022683	0,00257822316444071	0,00283427694095928	-0,00177924245919069	0,00296531734966854	-3.45347e+09	0,000417733975846162	0,00108406925150497	-0,000305378030595714	0,00144350435683768	-0,00185544398857014	-0,000375411749477421	-0,00024664146791755	-0,00116427325091849	0	0,00986787164479194	-0,0526809027065892	0,0079570544541484	-0,0323886955003369	-0,012947564331075	-0,00597825921178414	-0,0130672346979825	-0,00176768900481029	0,00113259937707472	-0,00265474678170084	0,00110210210020309	-0,00335488762401667	0,000132975844136791	-0,00289464870625388	0,000367438310741228	-0,00252166402564808	-8.52731e+08	0,000246342658469351	-0,000166589462853113	0,00197054097708302	-0,00147942253901059	-8.47226e+09	0,00055073577925823
Gnig-9R,Pilsey-Island_OK.niger	niger	1	0,0287172472366733	0,00715818025907303	-0,0158520599825979	0,0171889978836384	-0,0243014040131708	0,0146223664839482	-0,00641908036758807	0,000870318650176997	0,00538878285706493	-0,00302126401816623	0,0034090335914487	-0,00190231596116955	0,000315417450135036	-0,00155023830078442	-0,00110369341412923	0,000691013649295501	-0,000806048614296232	0,000670997162284625	-5.47504e+09	-0,000749669547322036	0,000860537141302686	-0,000753821953049191	0,000490356249347376	0	-0,0103230025704826	-0,0504683534776456	-8.07338e+09	-0,0353508649131736	-0,00291853899069021	-0,0108293763957911	-0,0107799272758841	0,00519239800222603	-0,00850608228035179	0,00205651289500769	0,000205009597112699	-0,00553319151805904	0,00332844348258377	-0,00400873137814352	-0,000360787639183641	-0,00179285578940416	-0,000938216686728695	-0,00121088767028744	0,000176406633783933	-0,000695523926987671	0,000664641046356603	-0,000454984588914438	0,00093257428676961
Gnig 1 L,Pilsey Island_OK.niger	niger	1	0,0358368520813708	-0,00447293364237163	-0,00141929048116667	-0,00325993692395239	-0,0152068798939866	0,00909185032522292	-0,00566563198133646	0,00342100469676442	0,00150127912992201	-0,00322415704181512	0,000950967889938937	-0,00252980564285964	-0,000215942718507341	-0,00250714641920603	-0,000810975458704155	-0,000890270200365926	-0,000774487138193246	-0,000781883913969134	0,000169991964791583	-0,00047612416230427	-0,00037620860094042	0,00124139836623194	-0,0011108838519817	0	0,0155320575523328	-0,0540261238031889	0,0188742442824072	-0,0535648474695118	0,00624937937650543	-0,0223195273228195	-0,00540642256153665	-0,00132021246268564	-0,00774861555547452	0,00466288664677674	-0,00538111914755236	0,00192261274598594	-0,00268804324075936	0,000884329870335213	-0,00201697958981824	9.09073e+09	-0,000115119077317134	-0,00076843888642771	0,0011690218786494	-1.74094e+09	-0,000139462166321676	0,000590835707233567	0,000240782380584123
Gnig 10L,Pilsey Island_OK.niger	niger	1	0,0419002980264168	0,0427887841552961	-0,00553929909127504	0,0428768911013521	-0,00628344286079647	0,0187441380642577	0,00510377685624418	0,00406470602281064	0,00182101973689286	0,00230433550520729	-0,00172482234218766	0,000743289368380466	0,000492113763733365	-2.52573e+09	0,00187298356866595	-0,000584720557734853	0,00223464182840485	-0,000391722170506086	0,000118029674707884	0,000624852711209305	-0,00215633383075341	-0,000409155280517437	-0,000735724603960789	0	0,0288492968323162	-0,0347329558187337	0,00362661726166237	-0,00976209746990464	-0,0104538920482754	0,00442912411423315	0,00144764123492753	-0,0023895473926414	0,0105929056159182	-0,00436390221956048	0,00432704861554009	-0,00121907037541235	-0,00225622700238004	0,00105330397208255	-0,000753262397366259	0,00170622051462592	0,000624867989314602	0,000684691874189235	0,00110496347995828	0,000497063023137615	6.50189e+09	0,00123115617325227	-0,000500989207032513
Gnig 2 L,Pilsey Island_OK.niger	niger	1	0,0175262254100383	0,0393177626568169	-0,0172075549437132	0,0340376941837542	-0,0146155394706372	0,015935495224575	0,00642746329306109	-0,00030567756702916	0,00728309549905558	0,000363126598254263	-0,000340046112677046	0,0018205917293889	-0,00205155051179544	0,000954249984217405	-0,00143734938679787	0,00297282535652403	-0,000391311521205842	0,00159456347979996	0,000224029344833729	-0,000482241034345545	-0,000310865896936408	0,00112226289432318	-0,000251039480354814	0	0,0101343458841933	-0,0337690794007608	-0,00540580456057039	-0,0185883443186851	-0,0195202898496712	-0,00161324290926951	-0,0120618643663378	-0,00150011272381167	-0,00201004519062638	-0,000288476557896674	-0,000253083893688681	0,00202568523638836	-0,00130943121863379	0,00164013567356902	-0,00274644501226665	0,00175358209834968	-0,00154918309784628	0,00167290025668443	0,000576605880196301	-0,000832321034686752	-0,000133205723084249	-0,0019325409424831	-0,00129523736795259
Gnig 3 L,Pilsey Island_OK.niger	niger	1	0,0697661561175702	0,0312567871079961	-0,0113065255464347	0,0421616188733612	-0,0207821760154685	0,0241756284142906	0,00459756233302534	-0,000351840884447569	0,0123250307572069	-0,00121639634418141	-0,00064181955564931	0,00348275958274822	-0,00410836615955054	0,00106880239393015	0,00169569176750066	-0,00110399435823333	0,00261778841262236	0,000142338108664137	0,00106700472520537	0,000915980342697282	0,000701275982600032	-8.08995e+09	0,000164126626475811	0	0,000220613212907166	-0,0375192822930922	0,00760064762658069	-0,0335349700753155	-0,00643589419026075	-0,00759192842733187	-0,00964887345895888	0,00113536234078356	-0,00384678650817776	0,00146412841684034	0,00160942705529537	-0,00136537673077152	0,00414419910325035	-0,00335231176694791	0,0018508739603411	0,000392968203612085	-0,00110434018145451	0,00307728181244648	-0,000570475199528265	0,000647973024541044	0,00250728067863372	-0,00067079773191925	0,00233754260758713
Gnig 4L,Pilsey Island_OK.niger	niger	1	0,0599261189480085	0,00703912839777978	0,00918627570548147	0,0137457222117619	-0,00668889880536951	0,0127923013215197	0,00203795657996274	0,00229233306090322	0,00680965484536229	-0,0031829049069761	0,00367679222666617	-0,003750550686849	0,00148092072264528	-0,00104060158065848	0,00114530084803249	0,000267674982083883	0,000592331525081934	0,00121187913067358	-0,00128724773083561	0,000633677298779516	-0,000505191217488662	-0,0014896129408264	7.11953e+09	0	0,0387088146744052	-0,0542662141837542	0,0219397415803498	-0,0447636838977155	-0,00230094531229577	-0,0160312089274809	-0,010517751679202	0,00156370138772719	-0,00882225715596446	0,00487141040759667	-0,00463353122687788	0,000807697568011037	-0,0021104978723431	-0,00136850970189387	-0,000643340952587625	-0,00175957687316619	0,000459823970442098	-0,0010047751226033	0,000839776109223884	0,000122764636388497	8.73684e+09	-6.09433e+09	-0,000645009123193789
Gnig 5L,Pilsey Island_OK.niger	niger	1	0,0324501175932178	0,0483086857045341	-0,00918189924615626	0,0343256895434322	-0,0123581714539468	0,017881566121956	0,00457859818576424	-0,000852382616891321	0,00648964940103716	-0,00209470195907018	0,00262670958407263	0,0035302486605626	0,000672373720911739	0,00389882863827504	-0,00264580915011375	0,00127118653279245	-0,000942878847253468	0,000296904423611878	-0,000619632190045688	-0,0016535455186104	-0,000628140834245658	0,000504666925343227	-0,00202942070975704	0	0,018437224005867	-0,0442402660717725	0,00580356656953418	-0,0217541387695416	-0,0138152672472734	-0,000877531727507926	-0,00648654690764968	0,00263174010789699	0,00119843040847535	-0,00300196583638562	0,00355712307110521	-0,00491599889406519	0,00152591640654788	0,00168664240107854	0,00200049756573298	-0,000984421224608065	7.7903e+09	-0,00142490382119934	-0,000311012802572529	-0,00290558196976415	-0,000189414561352778	-0,00122318625724888	7.4479e+09
Gnig 6L,Pilsey Island_OK.niger	niger	1	0,0402009037085072	0,0184778372867833	-0,00416234675882544	0,0255949671067516	-0,0172703416132479	0,0214789265822191	-0,00327044628236203	0,00282872394525365	0,00692988284736478	-0,00652261753072088	0,00492151427047935	-0,00254334173064023	-0,000686648646213816	0,00226584959777656	0,00048307911843124	0,00214134891894934	0,00166737104210901	0,000599153770569473	0,000431702538445311	-0,0012677320165888	0,00103542511476191	-0,00186417704483377	0,000712363213352402	0	-0,000792732168653098	-0,041438061432648	0,000465057376031778	-0,0370194617848283	-0,00294400434690776	-0,0120877878377626	-0,00522877144718021	0,00254692216877125	-0,00162910103354986	0,0035376026668793	0,000766318937138784	0,000722023341596288	-0,00050310450275388	-0,00241845522780246	0,000479748973274353	-0,00247548144126149	0,00168713261291885	-0,000729480695168157	0,000550099944776824	0,000238366925354856	-0,00102197116227524	0,00124186525702242	-0,000551127184537141
Gnig 7L,Pilsey Island_OK.niger	niger	1	0,0350314324810877	0,055240504966873	-0,00791614836343224	0,0440554116777489	-0,0127341325503513	0,0165856831441048	-0,00114254620811603	-5.18215e+09	0,00127977088594868	-0,00147633525713965	-0,000958066187278915	-0,000522621991595992	-0,00270487106956384	0,00188308223686295	-0,00180567234143057	0,00146168392491857	-0,00183638262357665	0,000178100821219512	0,000105489616276793	0,00121555246844968	0,000152833948218586	0,000328833233696684	-0,00158070107317328	0	0,0102391670436649	-0,0334128929488775	-0,0033675796427578	-9.70341e+09	-0,00845430297744237	0,0105918920292713	0,00245909815672495	0,00077075392970529	0,0106665753616566	-0,00295428356664744	0,00753405554687534	0,00107177642243594	0,000817771260278316	0,0027871177227837	0,00113229391704429	0,00273298209599431	0,00140681978759695	4.66228e+09	0,000524521677479698	-0,00197318694036912	0,0012568476212666	0,000225195476380399	-0,00142232024681603
Gnig 8L,Pilsey Island_OK.niger	niger	1	0,0284796740932881	0,0312962384839327	-0,0242375967637074	0,0266090555422372	-0,0205711852297998	0,00559278236080871	0,00525513913505532	-0,00717249123266525	0,00740475558579344	-0,00195109929356304	0,000655602870129862	0,00394892858487401	5.78538e+09	0,00281697484658731	0,000965557753336336	0,0017043989162301	0,000252009728482309	0,000277635740367216	-0,000118455085547336	-0,000171140316902882	-0,000244002835684145	-0,000435070296174976	-0,00149851623421346	0	0,0252162370964629	-0,0548449547752145	0,00970778168094912	-0,0325215301011043	-0,0117747660107985	-0,00934713144905385	-0,0107704228121222	-0,00226089469309817	-0,00199691683998323	-0,00476690189406336	0,000895396594935496	-0,00513135368703564	-6.89043e+09	-0,00145171190806659	-0,000924515792509107	0,000462651003492377	-0,000547521391399921	-0,000929246930455765	-0,000425407384425817	-0,00169591490611883	0,000578459596968746	-0,00204100310738508	0,000348015866206665
Gnig 9L,Pilsey Island_OK.niger	niger	1	0,0452882872947418	0,00404415987604143	-0,00560049631331944	0,00677362959367729	-0,0160488181805644	0,0108188097197045	-0,00499849657129809	0,00531079002888376	0,00159280127224304	-0,000659789139274715	0,00280464712479056	-0,000259598224842515	0,00276873771687731	-0,000111393169869579	0,00322554670476566	-0,000180715616151478	0,00147035101796605	-0,00105897819771171	0,000984633931784621	-0,00324310777582286	-0,00118793603149433	-0,000475891373861396	-0,00254774636891518	0	0,00354034100152107	-0,0454984123340384	0,0173747305746699	-0,0475315054993962	0,00512398841802922	-0,016599709752535	-0,00878021083945146	0,00247159011751984	-0,00528319130818271	0,00229641896024768	-0,00133451492864302	-0,00439545867599364	0,00176084609130452	-0,00525595070288387	0,00173739664734561	-0,00143902408873676	0,00164166554143358	-0,00106247662254611	0,001927118533339	0,000764159739495786	-0,000163930372509154	0,000161263137158488	0,000464842839498586
Gpag-1-re.paganellus	paganellus	1	0,0315536540733708	-2.38228e+09	0,0124856442760323	-0,00857937667961255	0,00264662407455794	0,000786077094756243	-0,000106756233238018	-0,00176551271877324	-0,00157088494497507	-0,00143992845541486	-0,0050164243048926	0,00393846227640952	-0,00465139730546975	0,00597968029354803	-0,00280313491154936	0,00164055548987653	-0,00070582768126676	0,000323700693818337	-0,00115312708100909	0,000314440211171436	-0,00187491400701231	-0,000218126583687305	-0,00140256567240017	0	0,0247934037544463	-0,0638835971995439	0,0181748516632828	-0,0517423793356748	0,00420450983551874	-0,0156042556510305	-0,00342017921402126	0,000339213830956693	-0,00273815109866414	-0,00219010254035664	-0,00157969384941739	-0,00227850795656308	-0,000972886987185924	0,000437986769503226	-0,00109686963657991	0,00147037577271679	0,00125668136602892	-0,00043458823479056	0,00235859699775852	-0,000441026538041981	0,000586497204475862	0,000401403173933517	-0,000350826191936505
Gpag-10-re.paganellus	paganellus	1	0,0272421502759725	0,0346560523021922	0,00380161361089741	0,00732151311361285	-0,00631839790972876	0,00792537336002312	0,00109173608961528	0,00394896074511874	-0,000234198332554191	0,000729591878691957	-0,00324268052417546	0,000117287240586456	-0,00288470489047374	-0,00168592307943484	0,000117932802123969	-0,00201565115962606	0,00114696428014722	5.44408e+09	0,000597569382129402	0,000583166208985722	0,000423239922708916	-0,000626666464531949	0,000312229483764787	0	0,0202359680669978	-0,0502083207011312	0,0245868690184631	-0,0386358632438554	0,00557262218127266	-0,0166528216920328	-0,00201347179955241	-0,00408396641101896	-0,00181238125279655	6.15181e+09	-0,00134843854324725	0,00257690846155334	-0,00256633069881175	0,00197613810515262	-0,00233109331512938	-0,000194677893655938	-8.01034e+09	-0,00260697362263707	-0,000235851806316118	-0,00246193843373649	-0,00103940758277572	-0,00130050661162121	-0,00141743466659171
Gpag-2-re.paganellus	paganellus	1	0,0321797470943991	0,0333532126941928	0,00602946787260895	0,00700521518524391	-0,00344929460338413	0,0057365974216793	0,00262038664590223	-0,000894509268356945	0,00343193365678614	-0,000815815873130848	0,000969872626971978	0,00083220551645172	0,000232787550839413	0,000466405149074139	0,00111608326214979	0,00202742107385666	0,000424244453553658	0,00285106590687769	0,000483645273845537	0,000387550676108978	0,00149609461154913	-0,00112945479710253	0,000822653505952815	0	0,025650933094883	-0,0513503490790309	0,0291666746464635	-0,0464624324961221	0,00590472627638592	-0,0191646829458854	-0,00326137782492381	-0,00654005826890741	-0,00247320446639281	-0,002003137831802	-0,0016449393644235	0,00224102400052698	-0,00358425475198041	0,00231351346900696	-0,0021790684182432	0,000932704916897282	-0,00191123410900666	0,00123341818688264	-0,00209159960770472	0,00164244654088716	-0,00109286148276733	-0,00133291131806557	-1.28111e+08
Gpag-3-re.paganellus	paganellus	1	0,009476061024295	0,0178730923445333	0,00515191586721966	0,000161420119089044	-0,000258720974354955	-0,000109648336844665	0,00274998342739132	0,00151097426205592	0,00146597164765671	-0,000551317302523378	-0,00010867650490324	-0,000849919227156373	-0,000421784508759167	-0,00126577788789886	0,000492694015054743	-0,00284816124316599	-0,000334807378242657	-0,00233215751217986	-0,000821283662111312	-8.15466e+09	-0,00269658954501943	-0,000534457115658818	-0,00197987005705344	0	0,00781072570615524	-0,0527851547118616	0,00999303413468474	-0,0461392037586378	0,00691178761940971	-0,0247072516139922	-0,00139485346049812	-0,0118548711214302	-0,0026340560918786	0,00014331277247424	-0,00257073887461959	0,00356709096721731	-0,00242286060598552	0,00542637350633772	0,000133749357192207	0,00533404770729068	-0,00153440034765563	0,00110323515164068	-0,000280136322679318	0,000592793446465331	-0,000864133769275007	0,00114286415792219	-0,000761578938129751
Gpag-4-re.paganellus	paganellus	1	-0,0100234794244686	-0,00364802546933471	0,00597315289436384	-0,000926018541980596	-0,00227441156188673	-0,00958245303478128	-0,00710984250517455	-0,0123388431172594	-0,000423843254804605	0,000912478052913446	0,00271332873653754	0,00492069364696528	-0,00314735155246168	0,00234134189406424	-0,00391362472458115	-0,000814237579203302	0,000103772728781589	-0,00142044203664901	0,00109166463179564	-0,000364866761410344	-2.43045e+09	0,000712155618086775	0,000439259084777865	0	0,00754690584531606	-0,0877087891056351	0,0126402939025334	-0,0561800858475855	0,0137012529289241	-0,0169610545402967	0,00166889534746994	-0,0101803291509719	-0,00419768449460366	-0,0084839421890799	-0,000166761542018857	-0,00104257010826707	-0,000590791350002711	0,00256368900675199	-0,00492775409247678	0,00218983938628087	-0,00299550229060296	0,00129616513522176	-0,000313631380281569	-0,000484067017783882	0,000959613595889388	0,000767105444765067	0,000711083206591474
Gpag-5-re.paganellus	paganellus	1	0,04172943566736	0,000563901121009213	0,0152258178267214	-0,0097698970712545	-0,00273245843615469	0,000868576111041685	-0,00109003806898139	0,000367218354911563	0,000339538081935647	0,00163506980410553	-0,00220993757294827	0,00215919077004498	-0,00404776596354244	0,00199705267074764	-0,00268644390725486	0,000684723902418342	-0,00136065959222852	-0,000249399824031438	-0,00142213901336634	-9.08047e+08	-0,000372015605027566	-0,00101623668184659	0,000348644146134682	0	0,0111405387640413	-0,0538635499967426	0,0237073770882339	-0,0460766946705547	0,00790702958385797	-0,0184326014840547	-0,00362280667204098	-0,00314606997907175	-0,00158154470695686	-0,00170600620703291	0,00306459274505949	-0,00231980859327073	0,00139199073035363	-0,000109908235399126	-0,000698581650329998	-0,000309220843605379	-0,000289787396337463	0,000234023205517055	-0,000564689747025476	0,000580866945995241	-0,00105955242734971	0,0013063508716739	-0,000299196298085266
Gpag-6-re.paganellus	paganellus	1	0,027384441791947	0,0455016869644102	0,00987295344897749	0,0218133204644093	0,00135683316203601	0,0166227453440575	0,00176801398947171	0,00726512892023894	0,00378332762211163	0,000446039987007683	0,00230759077004368	-0,0025078163455105	0,000758682806662627	-0,00230959213418201	0,00198046677230365	-0,000844178594568084	0,00156779000377112	-0,000266141426324043	0,000226412496888597	0,00134671042940056	5.23663e+09	0,00061262420791164	-0,000820212757681121	0	0,0206281961573344	-0,0310498577783113	0,0200483914852146	-0,0386711346661223	0,00881244215148865	-0,014478740238289	-0,000562508765765444	0,000667210883634796	-0,00228319233250025	0,00370604341968555	-0,000709228774902708	0,00274802867443642	-0,00246164540055874	0,00311694083371484	-0,00246398512011958	-0,000120810173861606	-0,000237957911741526	-0,000795242027006538	0,0019475341416733	-0,000680764054012871	0,00159170465632545	-0,00115229131563325	-0,000230769151503254
Gpag-7-re.paganellus	paganellus	1	0,0184822730362635	0,0465079736066392	-0,00925913484783624	0,0325976427970383	-0,00840904784076895	0,0147956385419319	0,000986477734748333	0,00218389030791847	-0,00258560174386996	0,00393807952781403	-0,0027285901664683	0,002017600949726	-0,000216523965355376	0,000985128609430685	-0,000938780616013724	0,00291537119254424	-0,000934882488384791	0,00261408100443335	-0,000102938209613895	0,000477308086777043	0,00127727805309401	1.21418e+08	0,00226700042497781	0	0,0226872551716985	-0,0438197994797187	0,0140929102165038	-0,0308715104007905	-0,00143208342669503	-0,00650711598336222	-0,00558699625637171	0,00155432403001092	-0,00305877102886861	0,00186524622315128	-0,00268022653635914	0,00107078619015659	-0,000861601411248028	-0,00183513619294076	0,0036906418855152	-0,00304443844303779	0,00565709763287906	-0,00175284582595006	0,00220084468564211	-0,00178378825193079	0,000114146575409635	-0,00221302978175027	-1.39202e+09
Gpag-8-re.paganellus	paganellus	1	0,015635055621467	0,0353652277592467	0,00694797662975688	0,0165607665273177	-0,00236381953623003	0,0140729726502257	0,0051603261108272	0,00397733045160025	0,00342699442764197	-0,00101334394801196	0,00240482005797996	0,00188530264410134	0,00161926473818477	0,0012012751608497	0,000550045542721646	0,00139549060057512	0,00124820644140056	0,000479184962002849	0,000255630291206278	-0,00124637923307443	0,000857436095811683	0,000157472768272215	-0,000589920667457644	0	0,0124828003082474	-0,0561006221162575	0,0226977984289537	-0,0485856830102241	0,00389948974755383	-0,0216392296284903	-0,00304767904008251	-0,00052532565218733	-0,000844296765659309	0,00064706680581499	-0,00193896443591531	0,00133542054317725	-0,00236597347002617	0,00238868299626558	-0,00366041637927587	0,00116603007818885	-0,00267564763216209	0,00165817019670461	-0,000737824862423628	0,000119369961602922	0,000858071045819062	-0,00023423478749649	0,00108465422455164
Gpag-9-re.paganellus	paganellus	1	0,0239595559310836	0,0339165633149232	-0,0207083002929696	-2.2324e+09	-0,0113905390108236	-0,00189440629423261	-0,0147360924224596	-0,00259749481333263	-0,000260880677835552	-0,0020016536784556	0,00225526279620651	-0,00240588211519264	5.15406e+09	-0,00360927981209956	0,000299829530535214	-0,00171957121511352	0,0017857349459795	0,000688013103760309	-0,000728566711577428	-0,00160670805884744	0,000738283195679562	-0,000978721882403936	0,00092833315298055	0	-0,0255311130184124	-0,0482128697097243	0,0186808916926159	-0,0573080578895127	0,00606502945424813	-0,015829294416817	-0,00539521745562345	-0,00781241673795809	-0,00348626615918429	0,00114923262049641	-0,00179797826672528	0,00533953284954702	0,00110490534259632	0,00167888888684668	-0,000199766407142354	0,000796225922597573	-0,00164447885174526	0,000907731246300363	0,000539288839103273	0,000191122494042239	-0,000659911478368287	-0,000236885400398519	0,000911008746456325
Gpag Faro 2013 10l.paganellus	paganellus	1	0,0303514974042124	0,0513523831624317	-0,0159155766517689	0,0171207785856844	-0,0164901534880366	0,014610364993003	-0,00971597403788419	0,00282842326346548	0,00434546481494986	-0,000354566249562697	0,00136132673629339	-0,00062715718458635	0,00106983420077607	-0,00131438779011156	0,00303366890084049	-0,00258845162167177	0,00117071233772566	-0,00316188261796177	0,000948362987293692	-0,00206820635438348	-0,00308300837221228	-3.45063e+08	0,000180667386915148	0	-0,0205240552715098	-0,0512185369984524	0,0247759899992655	-0,0485015786307722	0,000580262105777586	-0,0152801289959857	-0,00349896018540557	-0,00843175055071518	-0,00176584963831244	-0,00226217659144556	-0,000767039436720873	-0,0013346860532524	-0,000376236630998094	0,000146988862466609	-0,00148338453801696	0,000311621126280629	-0,000320247711062028	-0,00297246364618411	0,00147193852131244	-0,000947284698424097	-0,000181348058038867	-0,00130079120178531	-0,00173009667064696
Gpag Faro 2013 1l.paganellus	paganellus	1	0,0165854887073642	0,0184385822412392	0,007375834116136	0,00964541471989574	-0,00107483613860349	0,00895213503856659	0,000519719158893203	-0,00211460113523241	-0,000151815097991305	-0,00235476263006035	-0,00125254344961224	-0,000211208097877937	-0,00130212019874298	-0,0014715043294673	0,000317311915999002	-0,00272931235718294	-0,000129996681352494	-0,00170183764661079	0,000253684732479003	-0,00102168954425975	0,000863083255595624	-0,000790321617597737	0,000253610764482948	0	0,025524035566494	-0,0557422038007034	0,0186391418678691	-0,0529339707045756	0,00505529278187746	-0,0200916327943745	-0,00274975016186265	-0,00520717612568782	-0,00380843858653547	-0,00326458416039884	-0,0044216686147085	0,000693093486408253	-0,00288653184860176	0,00453630631665811	-0,00138597309254781	0,00249265868354134	-0,00167101807767174	0,000133355499233751	-0,00216170760550723	0,000112405685784962	-0,000654679239827261	-0,000528297379494955	0,000230034675767969
Gpag Faro 2013 2l.paganellus	paganellus	1	0,0446132611514583	0,014100420132786	0,0256814174248715	-0,00587150264553027	0,0106368191351738	-0,000404804123478022	0,00901981490413366	-0,00206769618922578	0,00375862391219603	-0,000247637819201771	-0,00131724155186965	0,0036934352676422	-0,00364737353852529	0,00292749032002506	-0,00222993077180884	0,00252960277131379	-0,00062397977397071	0,00304006821718581	-0,000723397200426023	0,00223006536742973	0,0010917678736085	0,000844425399133854	0,00183410483012306	0	0,0237932444483696	-0,0562889845802318	0,0270154874450232	-0,0522589170625654	0,00625588608936961	-0,020818070894282	-0,00285316576358724	-0,0073487994328341	-0,000951254837027044	-0,00260635564911546	-0,000408592444914232	-0,000855914268985761	-0,00210689953461614	0,000173037980861979	-3.80181e+09	-0,000534439743192517	0,000155401244221931	-0,00227250176269576	-0,00152823060851882	-0,00226898983767913	-0,00142258926104917	-0,000660422366822908	-0,00113183853843821
Gpag Faro 2013 4l.paganellus	paganellus	1	0,0107700078418266	0,0208628912416623	0,00972885003546628	0,0103642830244349	0,00389376913001354	0,00058775064022413	0,0055688223924389	0,00103219383297574	0,0106578741289738	0,00576983487222981	0,00358837757786405	0,0011330852613689	-0,00246060450911879	0,00210602484100342	-0,000320236747141988	0,0055496572311228	0,00235412588116632	0,00297549163755082	-3.87554e+09	0,000273452394341401	-8.36978e+09	-0,00307398197283036	-0,000318079988785534	0	0,0199427583804533	-0,0798004688651874	0,0161351779477826	-0,0506269405059452	0,0109175347420136	-0,0198031149846138	-0,00438496572055935	-0,00824504610461603	-0,000305605483532777	-0,00174186185266897	0,00476424819074146	0,00108782671461375	-0,000969411440735491	-0,00161469319359636	-0,00344601764847495	0,000351044615341653	-0,000155997872911369	0,00198362475783299	-0,00066828090721941	0,00259248499050436	-0,00295849015149824	0,000503060712519434	-6.56056e+09
Gpag Faro 2013 5l.paganellus	paganellus	1	0,0381152002680123	0,00692609487433222	0,0131338997402367	-0,00396514641062102	-0,0001898204379733	0,00368680333164802	0,00125598456934376	0,000547645495829183	0,000503190957615488	0,000293056288911098	-0,00127375618958682	0,000814756395169725	-0,00262965309651572	0,00124668181403154	-0,00259380308965012	0,000334164010549364	-0,00167959311728448	0,000394198602171027	0,000111006625436053	-0,000952925243833458	0,000600502266901814	-0,00156076695418171	0,00049748601075876	0	0,00836037106804082	-0,0586708225983845	0,0195412966837385	-0,050343309373186	0,00955596196715441	-0,0231335117564667	0,00076908157324175	-0,00413145299162616	-0,00164105737911589	-0,00123738522727929	-0,000850501603164782	-0,000816060560901403	-5.39036e+09	-0,000943598389384675	0,000262208124007695	0,00121140111933381	-0,000979924805209639	0,000960266996754846	-0,000636620195325725	0,00172030280635663	0,000352788536515973	0,000817112846328987	0,00102719753452956
Gpag Faro 2013 6l.paganellus	paganellus	1	0,0245072629895439	0,0613224700152995	0,00226226267715537	0,0287382721139724	-0,000910347903022034	0,017920797048117	0,00354575064953326	0,00621701105809223	0,00387777974213969	-0,000741375904393014	0,00510999485748775	-0,00324558717609747	0,00235295175984489	-0,00180353339886113	0,000999174854227648	-0,00057242353744623	-0,000767147770864817	0,0010941116547609	-0,000919522671383447	0,00148959851840881	-0,00105164264149907	0,000397016635119199	-0,000282822755374632	0	0,0101652002189036	-0,0280810138164277	0,0199338557655139	-0,0309696216487414	0,0065296684492191	-0,00806327265439871	0,00147781099981869	0,000863170964913004	-8.36392e+09	0,00171587110369856	-0,000153824843964861	0,00302629162248902	0,00160174960499385	0,00180299814451335	0,00291116593834826	0,00012241370158339	0,0020501298489161	-0,000367574500270426	0,000916545736477411	0,00053471330396589	0,00107294739667297	0,000842603608313647	0,00141629000583724
Gpag Faro 2013 7l.paganellus	paganellus	1	-0,00739551885986527	0,0501145812756885	-0,0128956362468159	0,0291709290866363	-0,0134005399057496	0,00806649869266284	-0,0018942552427639	0,00060269662404853	0,00104495688222426	-0,00357183995597737	-0,000115518028229095	-0,00230314809278972	0,00525728874251772	-0,00343632966408605	0,00208634963858861	-0,00477136484472314	-0,00126208529277774	0,00070987249163018	-0,000913965540217988	-0,00141235355281033	-0,00131391065915645	-0,00309328926910339	0,000147688720337437	0	-0,00248162584043484	-0,057341887216512	0,00835343958104604	-0,0336862624378844	0,00117601043094406	-0,0144706587415537	-0,00358772344814659	-0,00475271654976648	0,00184028714421322	0,000794826507337505	-0,000363080733350037	-0,000211211456503447	0,00213328781307539	0,00163040849945343	0,00356369129183427	-0,00271581990982412	-0,000403114876103452	-0,00245547775200836	-8.06834e+09	0,0019742324885849	-0,000279368178250015	-0,000706592205864995	-0,00164775847667487
Gpag Faro 2013 8l.paganellus	paganellus	1	0,0118258410167534	0,0344304861083496	0,00370444298009345	0,0213217338555531	0,000501688174227955	0,0132390470037952	0,00527479254874167	0,00112334862138737	0,00300629602840045	0,00117858770794847	0,000711184837645937	0,000146067730703775	0,00162800235592689	-0,00410882764429237	0,00211153549951642	-0,00296243040441766	-0,000119805052139604	0,000282321756097436	-0,000801966396882885	0,000747935514008645	0,000126867830552654	0,000174017205026509	-0,000195486507756535	0	0,0315512812737635	-0,0561985980233573	0,0242876540940889	-0,0470039620153988	0,00501650941430793	-0,0179855539821737	-0,00126353504852353	-0,00545484645423697	-0,0023336374559493	-0,00398700108225771	-0,00430734055740706	0,00170958521150604	-0,00453051988471121	0,00354062311149919	-0,00239304374956052	-1.00789e+09	-0,00163734342633979	-0,00265430379104429	-0,00306855816056248	-0,000805028062330299	-0,0018397349622319	-0,000275292106331167	-0,000446680213646456
Gpag Faro 2013 9l.paganellus	paganellus	1	0,0132698178498045	0,0302967049621827	-0,00352065194772425	0,00940732407719209	-0,00815873968214319	0,00816499599542228	0,00092673721157795	0,00116812458895003	0,00330239355541818	-0,00326359946784963	0,00153833506862854	-0,00397995885244222	0,000896017976380362	-0,0018804421529208	0,0025861448639155	-0,000791045378995457	0,00426078845837017	-0,00148539484534347	0,00218251637842056	-9.42111e+09	0,00108314183143066	0,000447395969311809	-3.62771e+09	0	0,0193004854614916	-0,058212300621953	0,0212665105960979	-0,047940546686045	-0,000849066345983039	-0,018749095792333	-0,00692355285141181	-0,00437568521005633	-0,00535440737743035	-0,000410147839026996	-0,0022570731810004	0,000246806171462705	-0,00256484451280575	-0,000683632202781832	-0,00230435784991388	-0,00139974494994679	-0,00158838705720861	-0,000761978214410704	-0,00188146470742399	-0,000846799218407294	-0,00132929868366465	-0,00104190637425591	-4.87977e+09
Grou-5R,Selce,Okt14_OK.roulei	roulei	1	-0,0016902454585911	0,0162615685288487	-0,0192139945793702	0,00689771995593992	-0,0219553298167521	0,00545196047515988	-0,00809206799857721	-0,000294288025133551	0,00284227314640739	-0,00198759677049067	0,00263044351870527	-0,000379563797669372	0,00247199248873554	0,00100355761606433	-0,000896792990595324	0,00208782158397746	-0,00188687831294018	0,000954054386369357	-0,00125431774865037	0,00203861068030164	-0,000648697384186212	0,000747277964769852	0,00110967330194751	0	-0,00178290539631952	-0,0467257948940213	0,00116966992944748	-0,0273866809752825	-0,011034780486048	-0,00795504804282876	-0,00995934774927502	-0,0053780557586227	-0,00570787096067508	0,00220829331487354	-0,00380344333682249	0,00247938129198327	0,00048409761330908	1.67021e+08	0,00257973823155256	-0,00258402871752047	0,00204117996581094	-0,00290261713522455	-0,000863351982434903	-0,00147173926531597	-0,000458112916081545	-0,000325717499263787	0,000673887073250147
Grou-6R,Selce,Okt14_OK.roulei	roulei	1	0,00599068010730392	0,0316735561709344	-0,0125157279926859	0,0223696934300507	-0,0118102866004941	0,0193696685400382	-0,0014673382462212	0,00640959253280313	0,00596966099443765	0,000828350817489569	0,00451968899296063	0,000625843705194922	0,00230766970699572	0,00110025083796329	4.30176e+08	0,000553812018568938	-0,000354371942033412	0,000440928867968209	0,000153174034105966	0,000946768223807535	0,00124169983399478	0,00055255576514069	0,00182432334986579	0	0,00316263513933791	-0,0305875216067463	-0,0111819257450755	-0,0172587946716337	-0,0168650815877311	0,000166367818038502	-0,00836417141462309	-3.36102e+09	0,0011891353997763	-0,0041099944067701	0,00298536232213433	-0,00363501641859671	0,00181987571456973	0,000253002889007978	-0,000500788805375575	0,00137721030141937	-0,000880355964131405	0,000576534271983752	-0,000260312884975931	-0,000199409750720395	0,000500574883246286	-0,000709302854061372	0,00066132722646252
Grou 1 L,Selce_OK.roulei	roulei	1	0,00729068260425344	0,0242585262475925	-0,0277684052406681	0,0053370131270533	-0,023169289088708	0,0124560565643664	-0,00434505938419205	-0,000563704742918883	0,00253943299690997	-0,000751402630146949	-0,00232851693872921	-8.44867e+09	-0,00342072591807151	0,00133424415825224	-0,00051972553283013	0,000209114863693345	0,000795552153598001	0,000149219985079617	-0,00030840997512124	-0,00166421287708463	0,000935657906253326	-0,00113930329453343	-0,000852305692958696	0	-0,0294346414135108	-0,0316114399564103	-0,00694314946689026	-0,0237015681159911	-0,0345501040764435	-0,00406886240175587	-0,0188697914733197	-0,00547164393455364	-0,00160980123382296	-0,00697822152197663	0,00292802780091224	-0,00161195400462151	-0,0020494128184371	0,000575418196168599	-0,00214193140154561	-0,00072712398862622	-0,0017946376510184	0,000396842563858033	0,00017120158776734	-0,00104262322892926	0,000262940613609755	0,0001065097974122	0,000551290761416458
Grou 2L,Selce,Okt14_OK.roulei	roulei	1	0,0350566462429783	0,00442214608822664	-0,0139829118084067	0,0110041049103337	-0,0221659021276068	0,0134270747658203	-0,00622611668943942	0,00196639948259067	0,00352788786931536	-0,00195324014001396	0,00352542446764646	-0,00239844336879557	0,00180895833393984	-0,00251931083638407	0,000651038681336765	-0,000988580596357455	0,000867991649833606	-0,00024189895769539	0,000713590884380095	0,000491649349617242	-0,000828770583968196	-0,000449510402563713	-0,00120098357084486	0	0,0101660892253298	-0,0411066608862922	0,00395370186603125	-0,0354213121110302	-0,00498933410454269	-0,0168988067392405	-0,00798913326196512	-0,00557616589077857	-0,00687438187416832	0,00081684153189268	-0,00315933667531585	0,000237743516402822	0,000639760140430181	-0,000414133990735763	0,0017505504053321	-0,000887665252804662	0,00214474930356293	-0,00098806059267265	0,00208377878190028	0,000504799186011117	0,00119214552321208	0,00126238556733891	0,000668542344600972
Grou 3L,Selce,Okt14_OK.roulei	roulei	1	0,01255391610294	0,0132733537402868	-0,0136125704242232	0,00356049456622037	-0,0200343734791686	0,00784404269743891	-0,00677561696233348	0,00219027625090189	0,00189506267090764	-0,000616863902743402	0,00113407030659833	-0,000862851199012719	-6.00796e+08	-0,0011455806829115	0,000216071938829072	-0,00139578686993503	0,000183843878840796	-0,000277028435202263	8.51392e+09	0,000312115689420466	-4.23937e+09	0,000451048856030262	-3.50043e+09	0	0,0185915466336322	-0,0361602869325498	0,0122091557352032	-0,0322484142934164	-0,00316021406326327	-0,0169725906762478	-0,00701509372844396	-0,00570785621426998	-0,00530900952232949	0,000109239241439578	-0,00393428744505194	0,00225640278162369	-0,00220615613710897	0,000902199335770805	0,000254839684610688	-0,000852531888394683	0,0013981547847009	-0,000990779918272024	0,000584273873754861	-0,000173245584788204	-6.87451e+09	0,000902303635980644	-0,00017559716386002
Grou 4L,Selce,Okt14_OK.roulei	roulei	1	0,026214769428006	0,0246205550033136	-0,0179506411279003	0,0173861116082931	-0,0176783989868587	0,00909752274897098	0,00181485449314412	-0,00255845684143846	0,00674114229392822	-0,00233455976235691	0,00258075196790191	0,000631840211081371	-0,000694859819749867	0,00130850894510086	-0,00197786994659783	0,000618769701193622	-0,000814824974630039	-0,000392121568287807	7.05188e+09	-0,000441891140499968	-5.19649e+09	-0,000489967790611571	-0,000605863282101951	0	0,0156065548440513	-0,0382894173862615	-0,000456897594785176	-0,0236625455159358	-0,0170054066909491	-0,00908884217677025	-0,0117964439610187	-0,00660199767460905	-0,000984270151027945	-0,00568235068991157	0,00246789272356978	-0,00175246108493597	0,00245895023924633	0,00188833899964986	0,000327706526516955	0,00247167405605282	0,000626806312519746	0,00128921000964058	0,00142814309537851	0,000155677643319154	0,0015409779776097	0,000667456497548598	0,000781080497364314
Grou 5L,Selce,Okt14_OK.roulei	roulei	1	0,00633535448642882	0,0137234186234053	-0,0221713252890687	0,0100212364799505	-0,0240710761926854	0,00937606720485288	-0,00437739761432271	-0,00316669320098483	0,00126423958426108	-0,00390533792016674	0,0027222965079396	-0,000246872918862274	0,00230339922246993	0,00246598465786539	0,00149916536077784	0,00163953491102456	-0,00118600814997758	-0,000429522846056934	-0,00127349472276382	-0,000608218197924458	0,000390158582210562	0,000129592654162918	0,00131799098116631	0	0,00762038288075314	-0,0412560331085476	-0,00406963426070388	-0,0269193134869825	-0,0169039938403912	-0,0103993904971677	-0,0127672770489172	-0,00450981602729845	-0,00686499455435229	-0,00562511577057858	-0,00239352081863362	-0,00386347533664022	0,000288352596987601	-0,00136045661797555	0,00206275115948695	0,000600049270095801	0,00190625365754471	0,000308415352240703	-0,000289257603113368	-2.2379e+08	-0,00111114544805248	0,00112197981470389	-0,000177341238624703
Grou 6L,Selce,Okt14_OK.roulei	roulei	1	0,0351535298863431	0,0288236018224638	-0,0132903351300674	0,0189091513600454	-0,0141488262170805	0,0126940361595493	0,00352114503888775	0,000640157867300433	0,00658595359633238	-0,00379149976917905	0,00236703480208595	-6.67109e+09	-0,00251500072846401	0,00297708372080492	-0,00290360205586377	0,000327547466696078	-0,000441132017478365	-0,00142815677331585	-0,000338224976482277	-6.73011e+08	-0,000834248315561935	0,000838019111699442	0,000228481315134386	0	0,00974802540719213	-0,0295728603657003	-0,00715393894710878	-0,0199582753174885	-0,0160586767871527	-0,00946050208333717	-0,00656454408651809	-0,00768861974403444	-0,000146652499363683	-0,00225738657743711	0,000303618312354898	0,000114859814285439	0,000333945634944875	0,000110848301051641	-0,000514185132019127	-0,000488783817619147	-0,000731167366034483	-0,000719568069786973	-0,00133739271117184	-0,000810617273215811	-0,00182727864982466	-0,000674513602684457	-0,000651951019179437
Grou Selce May 2016 1-re.roulei	roulei	1	-0,000245857149505344	0,0304446571975999	-0,0206410808596175	0,00982520533993567	-0,0142024489606717	0,00746103716806185	-0,00257101441430308	0,00314815820161149	0,000994925231672356	-0,00111496610635848	0,000342861121295074	-0,00195961789723259	-0,00241177822944493	-0,00172821858169897	-0,00287746935065332	-0,000573377236430335	-0,000914831909910365	0,000236245314623654	0,000156692305368554	-0,000755521016868243	0,000687572334078205	-0,000983698289733288	-0,00018528848720459	0	0,0166989424134926	-0,0264131795456241	-0,00152669174513759	-0,0162075233322657	-0,0166642837371007	-0,00654219243255272	-0,0100708747416161	-0,00657341909461283	-0,000359299751845553	-0,00482402523541114	0,000993484078277772	-0,00224207906678064	-0,00127194064852386	-0,00127992121013625	-0,00132133129264213	0,000295598033235918	-0,00105733019513022	0,000366665343157075	-0,000659761251770308	0,000394674391240805	-0,000214466116020152	0,000577567111184485	0,000183690708123788
Grou Selce May 2016 1l gedreht.roulei	roulei	1	0,00134051528804514	0,0323691064791944	-0,0213246473806358	0,0170997704529944	-0,0152367979857795	0,00752502260632096	-0,00282938771970945	-0,00314843685959208	-0,000236767344997579	-0,00281776639805231	-0,00142118065779568	-0,000872666921441817	-0,00178585036741895	-0,00102417715622553	-0,00183505552520252	-0,00125962301098201	-0,000663019376182861	-0,000920647410982794	6.08181e+09	-0,00121432722981604	-5.61607e+09	-0,0009381695382662	-0,000959762311577518	0	0,0142049800195322	-0,0365129956074772	0,00130187753394879	-0,0220615535306831	-0,0110498643505523	-0,00720770773558348	-0,00606747615466054	-0,0063056772421957	0,00142522192945308	-0,00618984673081646	0,00283970389784506	-0,00259980205469711	9.78669e+09	0,000654328423911243	-0,00220490985223377	0,00130145438604588	-0,00232949342545774	0,000215434359162092	-0,00104787136174381	-0,000342319278430796	-0,000704350574023632	-0,000166149022546827	-0,000788812417405517
Grou Selce May 2016 2-re.roulei	roulei	1	-0,0062574843788729	0,018513689229166	-0,0231512222781099	3.0394e+08	-0,0219075460393905	-8.82241e+09	-0,00641134927100015	-0,0022128455941029	0,00100036200265792	-0,00461982186550327	0,00180444980826983	-0,00583445792605617	5.01962e+09	-0,00335985221282875	-0,00153404383201032	-0,000331477954497336	-0,00170001959635221	0,000754508709319395	-0,00137565106648242	0,000818185224793362	-0,0010979704726258	-0,00015145670148652	0,000191940530089667	0	0,0148868493055896	-0,0296690856369539	0,00592446132126636	-0,0237976964916114	-0,00787500416135237	-0,0149592642109424	-0,00920262833807047	-0,00693345667349435	-0,00639169235623978	-0,00128932838997707	-0,00271251632446338	-0,000772839828133581	-0,00057597271416744	-0,00188530347171824	-0,000555098597689923	-0,001654551884226	-0,000796170160218942	-0,00141800990055354	-0,000744999355816112	-0,000970381307223169	-0,000501868702930872	0,000590935451691537	-0,000278724483309806
Grou Selce May 2016 2l gedreht.roulei	roulei	1	0,0141886426195019	0,0409037389967524	-0,0118362049987841	0,0166174050436128	-0,00857395470886255	0,010229234953876	0,00255506110728733	0,00170171231582507	0,00719834545365995	-0,00184183925809573	0,00450678442516924	-0,000751537240207472	0,000474109727968715	0,00185402836257362	-0,00107992421998775	0,00333759800513908	-0,000784978829565524	0,0018120038100088	-0,00104572515847108	0,000679404366409339	-0,000700415677910514	0,000121129926674927	0,000353803438725333	0	0,0239478355807286	-0,0377468283462717	0,000628390702971803	-0,0245472450871609	-0,0115430507839859	-0,011317033535077	-0,00762004996806978	-0,00500135818209521	-0,0025752472474218	-0,00175106435917247	-0,000330544218760531	-0,000961836558371222	-0,000206847675253016	-0,00136780111633733	-0,000643766347737796	0,000719844593863084	-0,000485212075481633	0,00106711766500141	0,00104245472314755	0,000421419703748095	0,00025762290672719	-0,000390058970278783	-0,000751915681948064
Grou Selce May 2016 3-re.roulei	roulei	1	0,015360658545599	0,0285347774050389	-0,0252475147353977	0,0171432396994653	-0,0144953448606859	0,00732411392947147	0,00443567488970745	0,00262409892354585	0,00763519557362437	0,00221684269090056	0,00438922908709302	0,00123368890073324	0,00166752660273131	4.40765e+08	0,00233362081822609	-0,00172254210954148	0,00245017998152086	-0,00136177268296352	0,000155977184478689	-0,000193088568758469	-0,00167865172692042	-0,000121417669754549	-0,0020578814050532	0	0,0156161256518745	-0,0349787456266028	-0,017350774779	-0,0135205616879943	-0,0324370038618005	-0,00786467096188129	-0,0106930256375234	-0,0135398239697309	0,00417000129994438	-0,00980702506534215	0,00276210837217467	-0,00267730936971874	-0,000878997244030774	-0,000572275967891247	-0,000467750029016479	-0,00277619401863096	0,000793985075403005	-0,00263231533879884	-0,000561423876936323	-0,000694990270770061	-0,00124039220878075	-0,000574849375347578	9.05873e+09
Grou Selce May 2016 3l gedreht.roulei	roulei	1	0,00366205311984829	0,0407379052416742	-0,0151507602046591	0,0205635140606293	-0,000647126935071659	0,0124014595813899	0,00697010585981845	0,00900136306767367	0,00118086100974091	0,00482423004867326	-0,000528627410571829	-0,0011230973929959	0,00209734535147541	-0,00358133635987244	0,00366030391670064	-0,00121903330844625	0,00129081607644835	0,00105473865256322	0,00062527722906527	0,000344746009081788	0,000399956977616473	0,00050745308156155	0,000536683044659566	0	0,00850818724857779	-0,026932107951623	-0,0250696414006161	-0,00997063200011491	-0,0297379470887748	-0,00356091616153296	-0,00563021571323101	-0,00924012747612766	0,00564177759757828	-0,00539732080987335	0,0022606768299672	-0,00206457411668409	-4.48477e+09	-0,00142483356604654	-0,000652851665051618	-0,00157506074015744	0,000426858840670966	-0,000796518489186681	5.70122e+09	-0,000838990655060077	-0,000433363655348188	-0,00179617547264696	-0,000120347923938436
Grou Selce May 2016 4-re.roulei	roulei	1	0,00759699931527428	0,0327406939153412	-0,0170874980078621	0,0171852149194759	-0,0165684200415861	0,0101862121904606	-0,00433626558303721	-0,00115024584231006	0,00085417868798165	-0,00490626098471044	-0,000876648217826055	-0,00289820752861244	-0,00229245472963028	-0,00214492836292321	-0,00296032313275674	-0,00160459350521357	-0,00317992236761031	-0,000551705777855687	-0,00294924117165263	-0,000940585585798565	-0,00154290858892112	-0,00167890246215293	-0,000426141006097414	0	0,00899798245050117	-0,0290687064820289	-0,00625904453986768	-0,0213616600163204	-0,018511535260933	-0,00451311521336471	-0,00973798264941415	-0,00111005489341339	0,000583136593091959	-0,00178414088498737	0,0033019174758423	-0,00138218612280278	0,00269641905921356	0,000858845759086311	0,000708474113554369	0,00296560665377082	-0,000387950949477297	0,00187420456324213	-0,000787673320317533	0,000140650349990654	0,000161011553297661	-0,000918476610547077	0,000524763147096164
Grou Selce May 2016 4l gedreht.roulei	roulei	1	0,00756160819521592	0,0380203701672267	-0,0152065467216096	0,0137317684368145	-0,0119764612790044	0,00834478012227599	-0,000403969677567732	0,000221984469363963	0,00161727620306228	-0,00209315923492707	0,000467252382460918	0,000248564536848144	0,00152462775421766	0,00158705765164351	0,000689760112492078	0,00173042688464884	-0,00147946907582594	0,000657965587478471	-0,00247213032012058	-0,0011916780955136	-0,000568498722063125	-0,00249624448013984	-0,000385684565747258	0	0,0147953674213903	-0,0317847584274012	-0,00371085094424606	-0,0206735880675217	-0,0124720665470585	-0,00779039585562436	-0,00804113319420129	-0,00252949758622681	-0,000997128632993847	-0,00268218169897112	0,0030256356954371	-0,00282563520942358	0,00309664742899665	9.52141e+09	0,00149566305992287	0,00271344866200265	0,000844409730409242	0,00136098953466949	0,00128653698932404	-6.24381e+09	-0,000118004193454738	-0,000909639891392566	-0,000868291067286855
Grou Selce Oct 2014 1r.roulei	roulei	1	0,00189496455197816	0,029267736194367	-0,0117615485752528	0,0292435527361146	-0,00763833063742586	0,0205853515493519	0,000425450095208957	0,00188254820207443	0,00123687014776831	-0,00197994896373683	-0,000635313407288241	0,00186606458780844	-0,00173353901151008	0,00242169691135195	-0,00254951806008204	0,000712633013758054	-0,00201305016936748	-0,00082507286620786	0,000128285198867091	-0,00102542068863337	0,000450808605124942	0,000407746372974197	-0,000641969840240387	0	0,0023795484610106	-0,0466679851912258	-0,0129250321212833	-0,0223875980610298	-0,0230761488271215	0,00140340217963737	-0,0113989846786644	0,00248780406963587	-0,000652823847719839	-0,00274601247981475	0,00176819450712043	-0,00202220882555937	0,000809705764411005	0,0021709455006008	-0,000956859730174867	0,00189549508611562	-0,00274079299103898	-0,000656844083925723	-0,00147048043164623	-0,00174456500275343	0,000629607311405595	-6.16216e+09	0,000778424534338969
Grou Selce Oct 2014 2r.roulei	roulei	1	0,0261882202396413	0,0176940863279826	-0,01257362338796	0,0194710849509703	-0,0161466640428294	0,0175602266590143	-0,000100671195117271	0,00654416848932597	0,00519940615566414	-0,000292776332263845	0,00315122107021098	-0,00336940988019371	0,0015820399331863	-0,00184792745306061	0,000246797877861865	0,00098991235266722	0,000754338275207572	7.08997e+09	-4.13546e+09	-0,00016515129699144	-0,00169030205233317	-0,000294418106180409	-0,00117911253013944	0	0,0124143012021783	-0,0513936615994314	0,010999574772716	-0,0403754320035858	-0,00313953636417017	-0,0186774563589923	-0,00692067509288302	-0,00670003108028838	-0,00527617034330983	-0,000522064681887734	-0,00310605459743322	0,000170166541666099	0,000481722395351501	-0,000718996258181377	0,00117590070446756	-0,000720212386384498	0,000522844900033271	-0,000197417553521238	-0,000241013091499397	-0,000539691551919811	-0,00139030533364517	-0,000257766094965231	-0,00163975891530201
Grou Selce Oct 2014 3r.roulei	roulei	1	0,00318235385569479	0,0137886468069776	-0,0132804124909588	0,00515617036440451	-0,0164354571817615	0,00782879938473741	-0,00180045993823324	0,000526680345588307	0,00699151560156057	-0,0018578073231581	0,00463318780966365	-0,00168313769843292	0,00086353685669545	-0,000544985816261377	-0,00120113216476905	0,000764422802410654	-0,00182422220090708	0,00191843255304086	-0,000939068028926323	0,000882862976270024	-0,000471017952935385	-0,000170874366152733	-0,000309254657320042	0	0,0119543032032442	-0,0369848769744663	0,0093249819199343	-0,0286140180564643	-0,0067255044714841	-0,0122549176605909	-0,0082796585437441	-0,00454001366878282	-0,00314109955249261	-0,00137000370215561	-0,00114158166426334	-0,000283408785558523	-0,000802420181497536	-0,000516699341893596	-0,000565361906433133	-0,000228193680739125	-0,000124804448989711	0,000625279039816487	-5.38673e+09	0,000423113413090962	0,00074424631221767	0,000998654755750574	0,00060094503061657
Grou Selce Oct 2014 4r.roulei	roulei	1	0,00179332870098161	0,0247467061347761	-0,0126238621349954	0,00747349438651441	-0,0189425779610251	0,00782187018045682	-0,00508978922107149	-0,00291979031858867	0,00330073164895324	-0,00191432856024016	0,00393654473520625	-0,000304491110976254	0,00176192231026091	0,00188498105219351	5.3691e+09	0,00165922686539775	0,000218685644695417	0,000998189680832713	0,00103054593059602	-2.01565e+08	0,000755531845205424	0,0011080062566078	-5.49954e+08	0	-0,00552935333290813	-0,0421815686725262	0,00420927891580694	-0,0252092560465459	-0,00961301282017983	-0,00772142180364249	-0,0110330964699446	-0,00328593533742997	-0,00687556496747014	-0,00193113785923949	-0,00126189175837435	-0,00068249931707584	0,000830964391701626	-0,00154709434939078	0,00191467160640285	-0,00101500550302352	0,000573370087240821	0,000125962602676175	0,000423247692297259	0,000867118057167964	0,000199809251302583	0,000449048285277273	0,000208782190999119
Grou Selce Oct 2014 5r.roulei	roulei	1	0,000132729423995567	0,0179372582910095	-0,0187953061237773	0,0077943374052061	-0,0209860296928129	0,00644086188210462	-0,00724798058788315	3.4498e+09	0,0034207202620106	-0,00207481628479061	0,00288502177128448	-0,00052241966310919	0,00211312655135697	0,000888490426573593	-0,00127469391828264	0,00240196265066135	-0,00188441363134101	0,00143520466319755	-0,00107054821107995	0,00233231522865721	-0,000384607968981898	0,000767383323761758	0,000988150681874098	0	-0,000484291035172837	-0,0450172357591202	0,000434115042405703	-0,02720300771216	-0,0121454963628806	-0,00785364063268099	-0,0103946079265785	-0,00518700855250678	-0,00577558411401967	0,00207346694312934	-0,00353013739616877	0,00257565878173732	0,000830437524440259	0,000184157648377094	0,00238598164108017	-0,00238749864887798	0,00187722212312148	-0,00261022347168868	-0,001023519059672	-0,00115871362014997	-0,000499793149668518	-0,000254046112855523	0,000950370822858472
Grou Selce Oct 2014 6r.roulei	roulei	1	0,00648045246663953	0,0333609602790557	-0,0121620610829365	0,0234087041177968	-0,0110998954934067	0,0193787428946573	-0,00136252751512552	0,00648144492178854	0,00525776038079185	0,000793496775123186	0,00464989245580822	0,000495235619249572	0,00193376129158503	0,00105914014480149	6.72926e+09	0,00065479081689675	-0,000230303667541838	0,000523997571767442	0,000206836295062879	0,000979393288821081	0,0012745169474722	0,000574036102130325	0,0019459961147807	0	0,00562195238925774	-0,0286123413572205	-0,0112900127207207	-0,0169586023184395	-0,0164039793797309	0,000435655370642212	-0,00834078537685019	0,000450995720324463	0,00101907866630184	-0,00367355184443936	0,00370992385141564	-0,00351584802760829	0,00221470634279634	0,000500836264705253	-0,000322892577497355	0,00140321873115714	-0,000986837903572136	0,000604072904523215	-0,000362998436279265	0,000136347637693908	0,000637234967730307	-0,000458620733114526	0,000796458633327705
Gvit-1-re.vittatus	vittatus	1	0,000429753449226273	0,0577577668749467	-0,00758207125202116	0,0461920122912415	0,00207806279958438	0,0150546315451011	0,00661048910997344	-0,000316063244871352	0,00489650856628817	0,00123160857627554	-0,0014443703102721	0,00314998492904891	-0,000836225841496402	0,000381492459432386	0,00260004510317563	-0,00138027504828715	0,00208673141256237	0,000395656645708195	-1.10467e+09	0,000128396462133447	-0,000140694273334067	-0,000642414108956735	9.98171e+09	0	-0,000436641018853967	-0,0131838494666758	-0,0137970902861908	0,00439766632456188	-0,00873910299878525	0,00976549905452746	0,00322862666207987	0,00289332790945378	0,00181171856577108	0,000854581582216352	-0,00169226817235427	0,00148379085142411	-0,00384159484442942	0,000106348897091633	-0,000278842144640963	-0,00100921772797117	0,00119603970352845	-0,000311886338196501	0,000488439366072338	0,00100489946243076	-0,000506366105812505	-0,000245923008781103	-0,000102055267006157
Gvit-2-re.vittatus	vittatus	1	0,0141027796672905	0,0362470864280899	-0,0175365711133024	0,0393413065785056	-0,00951278461111114	0,022628249366276	-0,00201570596006133	0,00383397683271352	-0,00244096327384247	-0,00637336367298656	0,00104759971380339	-0,00171068538987455	-0,00104736869096757	0,00509339693765641	-0,00111635264115003	0,000724537722558704	0,00191974461820122	-0,00102406481266446	0,00023777333678524	0,000952183089460353	-0,000419855351581781	0,000934964569228012	0,00115522136919446	0	0,00499536202454065	-0,0295892266694566	-0,0141085515925406	-0,0106116770380232	-0,0197009714544231	0,00901600242383679	-0,00529060201685615	0,00235841087109936	-0,00103258984251448	-0,00518210130014388	-0,00445181911822776	-0,00459284688729282	-0,00459676172398126	-0,00160650477357215	-0,00308481384446361	0,000644764879109975	-0,00156444450454184	-0,000708659833867166	-0,000511731112375994	-0,00154740344749834	-0,000940203634813671	-0,000562654667617212	-0,000523632264166833
Gvit-3-R,selce_OK.vittatus	vittatus	1	-0,00372856504467586	0,0456202804615226	-0,013439387891553	0,00751780452238124	-0,00519264381825055	-0,0110622088891832	0,00386148835546642	-0,00430149646207754	-0,000247241670593272	-0,0010565916311061	0,000972864955554024	-0,000395045882004475	0,00276848356886613	3.748e+09	-6.16441e+08	0,00063309807073684	-0,000182543141578773	-0,000252861333683651	-0,000467606021769444	0,000287294974730902	1.15898e+09	-0,000222916877580647	0,000163415590881181	0	0,00466175306135397	0,0183627323164129	0,0156882563699444	0,0258439568088507	-0,00407618514426233	0,00267074711979927	-0,000847981593555835	-0,00284618186028839	0,000379544692313127	0,000312649792430115	-0,00167218283778541	6.84315e+09	0,000810202645085327	0,000942958079255545	0,000867468852295968	0,000513113645766754	0,000540439363246014	0,000454817566063248	0,000275682814240141	-8.83437e+09	0,000352581817616708	-0,000373511312432713	-0,000222730746089947
Gvit-4-R,selce_OK.vittatus	vittatus	1	-0,00824020366234843	0,0553208218435733	0,0127520285075306	0,0367278788540411	0,000283641452261798	0,00677867172799426	-0,0077464278542435	0,00214027483155333	-0,00197159419679018	0,000409477353032628	-0,000609482067775786	-0,00126938643001724	-0,00161355261328375	-0,00175486892836331	-0,00228489344759002	-0,00119231472655858	-0,00206911416764594	0,000730381946872468	-0,00119575204904261	0,000147028658299736	-0,000218166410765922	-0,000690528759649605	0,000123088989805049	0	-0,00335167769634004	-0,00894296081703639	0,0106127973018182	0,0101729694732563	0,00918544642818721	0,0129087263585323	-0,00122889452835735	0,00462997315667332	-0,00439521171416599	0,00472780695901035	0,000366864594880727	0,00303503317671677	0,000706954820522808	0,000535234581820108	0,0003203199497823	-0,00157406067571778	0,000668779412065102	-0,000650812457880462	0,000486046568529445	0,00137392256610661	-0,000780936941731198	0,000625311334558135	-0,000625954716876383
Gvit-5-R,selce_OK.vittatus	vittatus	1	0,000877496492464611	0,052829026529992	-0,00536609267147653	0,0386623358451612	0,00221252408334211	0,0156303921646785	0,00409308376307668	0,000255739348444207	0,000933961861704297	-0,000146102493149015	0,000251137207471748	0,00254796342561959	8.17323e+08	0,0019102071443589	0,000449253816320165	0,00115271310354063	0,000742653239163344	0,000706137399022336	0,000594930385361709	0,00101676914888075	0,00119298811070029	0,000837021483980989	0,000571271402342951	0	0,0070295160558441	-0,02958052202079	-0,00125630592044777	-0,00853701336106492	-0,0124468847729979	0,00572132773920683	-0,00226570323040265	-0,0012727543141088	0,00122505381344031	-0,003904978523674	-0,00298386930533241	-0,00228964992268791	-0,00236956469427847	-0,000204050970418244	-0,00231034314463732	0,000784356781546714	-0,00202158263107534	0,000154839203825315	-0,00168547491851687	0,00056388895126739	-0,000580524372393446	0,000772040604338299	0,000724840506229497
Gvit-6-R,selce_OK.vittatus	vittatus	1	-0,0142598545036196	0,0302468727531475	-0,00457921333626477	0,00680298261169085	-0,000774754262910312	-0,013577954999455	-0,00249369600903359	-0,00727284141647605	-0,00218961126806486	-0,00189652109081251	0,000464082491545936	0,00275734283876506	0,00240113216162655	0,000361005904840108	-0,00131117573534126	-0,000855691407672605	4.59439e+09	0,000430722684217673	0,00124380960343891	-3.75904e+09	-0,000373854474361877	-0,000827511146596981	-0,000279450786916668	0	0,0095912711464774	0,0261181128329301	0,0179506058483041	0,0256236613589871	-0,00154680576205286	0,00765340939004755	-0,00493350069766988	0,000452672129636884	0,00258429623681177	0,00108301481459416	0,000709046679492918	0,000288608642676474	-5.26393e+09	5.58838e+09	0,00136616728662166	-0,000190650677160636	0,00194500243912727	0,00121161002918865	0,00124712585542034	0,00126150597251022	-8.77795e+09	-0,000467055097908238	-6.56781e+08
Gvit-7-R,selce_OK.vittatus	vittatus	1	0,00352247744486116	0,0564042321481081	-0,0204291910038871	0,0444784856495517	-0,00173012051651803	0,0126824232650459	0,00767121404202927	0,00233718620081495	-0,000765129057838583	0,00474169688863479	-0,00317965941097487	0,00204207994595093	-0,000291762599651269	-0,000102475803571744	0,00019932277333125	0,000999307056455849	-0,000867781282245253	0,00141531404356448	0,000434394914050083	3.24255e+09	0,00138111232429352	-0,000133739863105352	0,000542042953663072	0	-0,00392889016044187	-0,0308206426920998	-0,0123605330209809	-0,0126525913878115	-0,0132281285355378	0,00258007715975694	-0,0022593589939429	0,000209044610647246	0,000691590037847849	-0,000872259912134362	-0,00148233878485499	-0,0019555063621638	-0,00105442529985583	-0,000815757987163268	-0,00212216629940721	8.04276e+09	-0,00134357214495151	-0,000640834648134406	4.61565e+09	0,000484232253783043	-0,000908787230655667	0,00105696605615994	1.11038e+09
Gvit-Selce-May17-no1r.vittatus	vittatus	1	0,01575502459228	0,0488030651799567	-0,00778954547665318	0,0410188012378248	-0,0100502622544973	0,021902317431076	0,00350104195804987	0,00107467885588801	0,00356822030868533	-0,00122074289126538	-0,00094928448972355	0,000826551076210583	-0,00168729386673219	0,00162932491497253	0,000723512067375551	0,0018853883045466	0,00111487211801964	0,000799318408084201	0,000728545110406371	0,000904973521050394	0,000275267941313038	-0,000176469826327508	-0,000156183586086051	0	0,0103242043642362	-0,041580979103675	0,00592046597285061	-0,0227013719016843	-0,00211888798884949	-0,00265293136754692	0,00352965277467383	-0,0028990841238284	0,00502490263642169	-0,00468370374616873	0,00186719828447707	-0,00219289591402358	5.31006e+09	-0,0025841257611424	-0,00147837730874146	-0,00136616448536948	-0,00158061345797199	0,000676597884506862	-0,000905623882059226	0,00170777875725819	4.09574e+09	0,00104646259723615	0,000267288131544261
Gvit-Selce-May17-no2r.vittatus	vittatus	1	0,00964054860341892	0,0542979655483486	-0,00885209332299674	0,0415550493143659	-0,00436044260410863	0,020475780716872	0,00105493003170556	0,00459084756595538	-0,000285630775282456	0,00112446408092755	-0,000542439915440203	0,000310508073629704	-0,00188260293727711	0,00202341179788674	-0,00202056450181835	0,00249612322142256	-0,00105934089752403	0,00190063110264111	-0,00100740751462956	0,00109203527027111	-0,000530383644943106	0,000176158069264946	-0,000200998013182996	0	0,00832556993297966	-0,0312095172665899	-0,00925153736689135	-0,0110644525674131	-0,0131209464012659	0,00422740507908435	-0,00179272337211438	-0,000318141986246021	0,000149821637807792	-0,00248124040207062	-0,00154186042749813	-0,00220738706990019	-0,00152645038813394	-0,00166769165391003	-0,00255875731567644	-0,000813356889129407	-0,000910265974389024	-0,000447447811899174	0,000350656929722572	0,000162066505735562	-0,000416908250892765	0,000565289243598762	-0,000656612219703868
Gvit 2 L,selce_OK.vittatus	vittatus	1	0,0106854994511013	0,06177164367597	0,00564722648530428	0,0489847536572153	-0,00891806972700705	0,0120693099588971	-0,00452783154294554	0,00192898913547086	0,00356900176253902	0,00127487356741795	0,000869147708068447	0,000155916389261253	-0,00345080764519314	0,000582028182932046	-0,00224685414566166	-7.24232e+08	0,000116321498962869	-0,000450611736433524	0,000243839728493343	-0,0006322448908401	-0,000362472857017404	-0,000572522539365533	-0,000657487443900638	0	0,0150319003279063	-0,0194996501808342	0,00995669650658423	0,00676782612714848	0,00452704582487385	0,0163055195222522	0,00131916743037873	0,00461503326036486	-0,00385794779459409	0,00115495013010149	0,00182314871299255	-0,000143481342436415	0,00309882699153388	0,000831502751871834	-0,00137772168965233	0,00143473268026691	-0,00160990081298213	0,00138309740228068	0,000629047414432392	0,000206365161526437	0,000736862498616971	-0,000461316728583954	-0,000262196847173822
Gvit 3 L,selce_OK.vittatus	vittatus	1	-0,00305907589723118	0,0521814401095512	-0,00561374324750234	0,0258831486533808	-0,00972241248045688	-0,00702853385055572	-0,000498383206179566	-0,00219289198734616	0,00112784054728606	0,000211977749433651	-0,00346828491758953	-0,00132486617893652	-0,000915307634388127	-0,000970339792101948	3.61283e+09	-0,00024960286161279	-0,000166412182259429	-0,000307947726209891	-0,000714206568128974	-0,00022991999838427	-0,000383726138529458	0,000206710906309983	2.83082e+09	0	0,011297228953397	-0,0144822475240499	0,0205861037411754	0,0221615668442716	0,00192376552206654	0,0129150485989445	-0,00426882192362877	-0,00121399946770367	0,00219138415789276	-0,00257159978323781	-0,000616794308232111	-0,00141192979560473	-0,00408766381653084	-0,00169457061347412	-0,00185868590643304	-0,00103399205229236	-0,000359540701466664	0,000225013546679543	-0,000415978430112156	6.41622e+09	-0,00029056572652824	0,000623630112947693	5.59406e+09
Gvit 4 L,selce_OK.vittatus	vittatus	1	0,00641375575789055	0,0384807059725272	0,0171533429612715	0,0452969404235013	-4.33451e+08	0,0114137376658095	-0,00652907835401779	-0,000184859241938751	0,00371163593599174	0,00199436221315462	0,00392418472831813	0,00233329151248846	-0,000596740954466695	0,00219921935926489	-0,00164456978733382	0,000495582535856059	0,000157727826754506	0,000251807740920433	0,000459196629433061	4.92107e+09	0,000582110414043423	-5.19505e+09	-0,000596562811509132	0	0,00993180638452856	-0,0407620291472474	0,00789698017252708	0,0064894975334525	0,00974618785406091	0,0186287739101419	-0,00113907221440465	0,00735074956014249	-0,00406867457478559	-0,000183330382925852	0,000538466001338207	0,000784482859145058	0,000961180478658526	0,000504740392771432	-0,000372848886463951	0,000359765084046598	-0,000461912593295604	-0,000483859511344651	-5.74885e+08	-2.07606e+08	0,000370482934538374	-0,000165478698052076	8.99055e+09
Gvit 5 L,selce_OK.vittatus	vittatus	1	0,0164434864810033	0,0417963556412028	-0,00152010392097584	0,0374050440603759	0,007304966341473	0,0117000414129456	0,00916475078363483	-0,00158636484176289	0,00286648039303127	0,00128830936982379	-0,002653403906458	0,00224213354415106	0,00031751625765326	-0,000282981858002975	0,00281151573165187	-0,00140075916900561	0,00104002816329556	0,000290037036224	3.20139e+08	0,000588952925735609	0,00143574051263603	-0,000399614384036138	0,000888133867346326	0	-0,0102941751690536	-0,0213023192777994	-0,020893053512183	-0,00307029314326842	-0,0177127287393145	0,00596579882016194	-0,00631178667285135	0,00206367773386731	-0,00363553884226285	0,00154100934515223	-0,00289480860234977	-0,0020387976407958	-0,00155024483417071	-0,000680104807263399	-0,00137577340338664	0,000376261238916007	-0,000576661186941762	-0,00112544677716129	-2.69506e+09	-0,00107873198682412	-0,000272244578845991	0,000545461557042567	-4.30459e+09
Gvit 6 L,selce_OK.vittatus	vittatus	1	-0,0111881933789277	0,0292152053642611	-0,00659164567149655	0,00885274252302278	-0,00583683868794496	-0,00666518686907052	0,000982355453654236	-0,00453629211873043	6.72946e+09	-0,00126495453406002	-0,00210519581463607	0,000143273000191252	-0,00194101739632088	-0,00152322534944255	-0,00184174144572298	-0,00161818257874116	-0,000459661588680805	-0,000504385010310138	-0,000418516776691148	-0,000611226167023792	-0,000708376853512633	-0,000294422748207736	0,00028681862961522	0	0,0244802387456151	0,0133585538329456	0,0232846056648835	0,0224716618359326	-0,000817403005056046	0,00499108746271847	-0,00292167811620749	0,000146911534531645	0,00189606513452056	-0,00190519005636985	-0,000857622552629178	-0,000347050522379498	-0,000929025070836359	0,00133262537101217	0,000363354220196407	-0,000463050866538877	-0,000261767347646227	-0,000482141106538611	-0,000525708216570281	9.86812e+09	-0,000511366534924153	0,000263087907157336	-8.41532e+09
Gvit 7 L,selce_OK.vittatus	vittatus	1	0,00250928039210715	0,05285198169289	-0,0211832905780999	0,0377689146353726	-0,00376318939191634	0,017753658053453	0,00565338828931539	0,00577870392024986	-0,000357780015206104	0,00245707935500261	-0,00242974435177669	0,00105497295687015	-0,00139206104120028	0,00139253875056462	-0,00079379842710228	-0,000223859478338818	-0,000775671309157917	0,00132841823807416	-0,000580026630707417	0,000844115197423042	0,000662311779827203	-4.05212e+09	0,000141805035292727	0	0,0121779190437626	-0,0333421675920192	-0,00728322822924234	-0,0165075149374167	-0,0150113613828249	0,00182405517207217	-0,00439670278488832	0,000882367949105529	-0,00204651611871139	-0,000389137761140616	-0,00273471955316784	-0,000834511976490581	-0,000924523403066579	-0,00201963204013455	-0,00136957349332343	-0,000267473778039393	-0,00229432846808587	-0,000874639312261205	-0,00152313829302424	-0,00194434063976558	-0,00118271904714774	0,000156470756372165	-0,00070205923599776
Gvit Krk 1l.vittatus	vittatus	1	0,00111772440833882	0,0609116788417371	-0,0149159862715304	0,0410326121839632	0,00490861589241587	0,01571538304155	0,0073974936440296	0,00452020060318752	0,00230448883736983	0,00228615992042002	-0,000420499010381876	0,00342666311577068	0,000837515274891812	0,00133218687290264	0,0026756674257369	0,000694015370570972	0,00141879182964853	0,00119153158374125	-0,000160812363967825	0,000141653513270663	-0,000117926973988622	-0,000782006485913556	0,0001385101903506	0	0,0178353535695123	-0,0253214285173111	-0,0135083550489848	-0,00939737787474729	-0,00850296320550273	0,000695945529890392	0,00425972689075323	0,00347580412455459	-0,00149397765232916	0,00185664360899773	-0,00233242672958526	-0,000199133085537285	-0,000811629556781854	-0,00122256579285726	-5.96257e+09	-0,000693350665213001	0,000323121864983612	0,000503021515469523	-0,000247936465683293	0,000794404260521994	-0,000333232649845497	1.28979e+09	-0,000146428654408156
Gvit Krk 1re.vittatus	vittatus	1	0,000429753449226273	0,0577577668749467	-0,00758207125202116	0,0461920122912415	0,00207806279958438	0,0150546315451011	0,00661048910997344	-0,000316063244871352	0,00489650856628817	0,00123160857627554	-0,0014443703102721	0,00314998492904891	-0,000836225841496402	0,000381492459432386	0,00260004510317563	-0,00138027504828715	0,00208673141256237	0,000395656645708195	-1.10467e+09	0,000128396462133447	-0,000140694273334067	-0,000642414108956735	9.98171e+09	0	-0,000436641018853967	-0,0131838494666758	-0,0137970902861908	0,00439766632456188	-0,00873910299878525	0,00976549905452746	0,00322862666207987	0,00289332790945378	0,00181171856577108	0,000854581582216352	-0,00169226817235427	0,00148379085142411	-0,00384159484442942	0,000106348897091633	-0,000278842144640963	-0,00100921772797117	0,00119603970352845	-0,000311886338196501	0,000488439366072338	0,00100489946243076	-0,000506366105812505	-0,000245923008781103	-0,000102055267006157
Gvit Krk 2l.vittatus	vittatus	1	0,0182601198058574	0,0467487115077401	-0,0151116596514497	0,0430652374186085	-0,00681712279973377	0,0237976108745997	0,00483495328176723	0,00437063048423339	0,00392058681097021	0,000554653354604748	0,000634662008123707	0,00224676007040755	0,000113477506229488	0,00341590675844649	0,000504759823662469	0,00247760368322318	0,000926748841700082	0,00127434552641478	0,000278987875370706	0,00105034333060143	0,000273254174422991	0,000607857081122566	-0,000103751206068788	0	0,0227042554283757	-0,0442502567088996	0,00349509265062127	-0,0214649465003714	-0,00756229955654154	0,0033550272562372	-0,000510495150453919	0,0038975029756876	0,00160504751195211	-0,00289180183529103	-0,000982430262071591	-0,00276503712506902	-0,000676910025551904	-0,00129000455264948	0,000321910583407051	-0,000414913824209086	6.48316e+09	-0,000564202609752644	8.07706e+09	-0,000278328179807537	-9.74532e+09	-0,000430376354851874	0,000497904193198687
Gvit Krk 2re.vittatus	vittatus	1	0,0176340306244805	0,0386369109704343	-0,0168218175320074	0,039628752348492	-0,00863660151540001	0,0224236188862865	-0,00102168336090425	0,00438724085302743	-0,00132632031927061	-0,00587652347912411	0,00142750251358738	-0,00120956108345478	-0,000959004953156227	0,0053023538254934	-0,000439587010085609	0,000779492617344466	0,00229179952001145	-0,000741953147446283	0,000258853398136732	0,00116216435099704	-0,000331100108257477	0,000921248109635526	0,00120668931862781	0	0,00583606790891213	-0,0277457719751585	-0,0133428276852946	-0,00919606095008353	-0,0198831758068921	0,0094531697900014	-0,00509219198105348	0,0024387474014195	-0,000408634960386591	-0,00493840938894817	-0,00403023598669897	-0,00445193420384451	-0,00461377412319031	-0,00144918845634804	-0,00320425449959902	0,000654794339043437	-0,00111210383183798	-0,000706450246620202	-0,000194433406176465	-0,00131495824412931	-0,000884263903965811	-0,000501176469413296	-0,000267232416746704
Gvit Selce May17 no1l.vittatus	vittatus	1	0,0174634288319753	0,0626173079346072	-0,00849137431735219	0,0464659611150694	-0,00441697859497981	0,0203270674738412	0,0064662526106305	-0,00207367627819429	0,00600611998175548	-0,000611553102636774	0,00190542252449086	0,00259890554413092	0,000977505432939058	0,00258666689020794	0,000667131101754233	0,000281730934939189	0,00100102560034708	0,000617611172691116	-0,000103781140653398	1.42967e+09	-0,000525137709643736	-0,000258667998705578	-0,000455902193648155	0	0,026542869491547	-0,0349235202980638	0,00130552421206905	-0,014646483789714	-0,00128330282053646	0,00316140282835582	0,00487315686296792	-0,00100316563513565	0,00384876757196822	-0,00334039798791642	-0,00048166560533478	-0,000403395185641344	-0,000836355497515206	0,0010410275492718	-0,00122618075729718	0,00216705070226337	0,000256748885709394	0,00185198295608678	-0,000608735535291405	0,00163472801953195	-0,000486932497169731	0,000459797530376269	-0,000345965966022197
Gvit Selce May17 no2l.vittatus	vittatus	1	0,00229677020835926	0,0544818426119175	-0,00910590455752926	0,0377564780821987	-0,00245575838553435	0,018073049380927	0,00513258088418154	0,00384960891761965	0,00236900173752805	0,000237394930607164	0,000435747482506313	0,000658782813939551	-0,00084386812153716	0,0029143852420199	-0,00108625359793447	0,00252131493058152	0,000396616378901332	0,0012218407228343	0,000791855037920174	0,000679115466403526	-0,000210467376821753	0,000375646908840783	-0,000511421124333161	0	0,0133161874552245	-0,0351287273822414	-0,00456182426446911	-0,0144370063813355	-0,00887816273516219	0,00456705636684786	-0,000144647659995139	0,00209462816014152	0,00145431339813699	0,000470701257353592	-0,000137807927199722	-0,00102320888658893	0,000471742467893123	-0,00146122838674838	-0,00152891277627581	-0,000172071213213445	-0,000941462757402455	2.14651e+07	0,000261161458992182	-6.36753e+08	0,000349211928079915	0,00059629636230309	3.9025e+09
[truncated: 48 more columns]

## Sheet: Suppl. Data 3c
	Supplementary Table S3c. Fourier descriptors when the complete data set of Pomatoschistus was included in the Fourier shape analysis.
	Specimen number	Species	A1	A2	A3	A4	A5	A6	A7	A8	A9	A10	A11	A12	A13	A14	A15	A16	A17	A18	A19	A20	B1	B2	B3	B4	B5	B6	B7	B8	B9	B10	B11	B12	B13	B14	B15	B16	B17	B18	B19	B20	C1	C2	C3	C4	C5	C6	C7
	Pom kne 1 L,Krk.P_kneri	P_kneri	1	-0,0246437354101789	0,0160413407035209	-0,00995820968884498	-0,00460051737347737	-0,00148748456699469	-0,00215312915266039	0,000627398856268317	0,000811720543316781	0,00204202019015418	0,000550564021065004	-0,000128421330040875	-0,000796070604614682	-0,00203317811479787	-0,00169691835038725	-0,000665758005356	-0,000226434971937523	6.21312e+09	4.97373e+09	-0,000353683722266427	0	-0,0127613150583999	-0,0140160416396669	-0,00909238184468074	-0,00395102271204068	0,00332782840417971	-0,000760453161299074	0,000604285850318517	-0,00267187209300705	-0,000524838507024027	-0,00107572328864922	-6.63417e+09	0,000136630680606849	0,000421452006529311	-0,00115251011277752	-0,000968609221030843	-0,000763506927211103	-0,000315460905550482	8.02782e+09	0,000274478283912848	0	0,0239644159529119	0,00955375255633014	-0,0173776645885444	-0,00443254688823649	0,000836497550622989	0,00273134972920205
	Pom kne 1 R,Krk.P_kneri	P_kneri	1	-0,0257895772836434	-0,000659111390304828	-0,0119555162949216	-0,00950187809371357	-0,0105115839711874	-0,00780749988244976	-0,00833978180817226	-0,000484117800295007	0,00108956096599828	0,00414539133615541	0,00195537658248611	0,00147728870891609	-0,00154471639564097	-0,000660741978693577	5.8825e+09	0,00113426871680433	0,0011832997355284	0,000390520670054986	-0,000211152175232598	0	-0,0289974702886072	-0,00521961196753433	-0,00319812622821154	0,00787352374048652	0,00887936198506022	0,0073636921821824	0,00120822789123027	-0,00129555492001779	0,000262769933746833	0,00139063068357799	0,00364887869350232	0,00266400630356104	0,00174633435345652	-0,000942870072381683	-0,00106227505506953	-0,000504869116031853	-8.08128e+08	0,000844576031281504	0,000630721479340461	0	0,0104085702192233	-0,00179878812855714	-0,0195423529498988	-0,00257623272876002	0,00634851876814036	0,00597601775715034
	Pom kne 10 L,Krk.P_kneri	P_kneri	1	-0,0030897725502887	0,00602535988568303	-0,0138732058382635	-0,00154186231751773	-0,00450256051206108	-0,000238394155721706	0,00404207208003824	0,000758154739252702	0,000418098924873809	0,000480508985861084	0,00158254159474587	0,00153720111198356	0,00204866334702642	0,00193997861678467	-0,000122067707996818	-0,00034141964774772	-0,00026549959558922	-0,00050342679647235	-0,000362950044022537	0	-0,0105045277675909	-0,0190917996366144	-0,0117945058373664	-0,00844111088758627	-0,00678990652153073	0,000399243443765135	-0,00163973670483891	-0,000763866061527962	-9.8073e+09	-0,00233988500281438	-0,000183264718064734	-0,000189851493625073	0,000662856025701926	0,00117459244706973	0,00103269915887589	0,00101137757249739	0,000642141160655254	0,000415467394183168	0,00059358690472025	0	0,0425070258597296	0,0122833470019502	-0,0115182763297535	-0,0114258593510294	0,0018818836085949	0,00351524884963341
	Pom kne 10 R,Krk.P_kneri	P_kneri	1	-0,00609315390046509	-0,00115229629639062	-0,0131267958188967	-0,00581620788898009	-0,00820631293113421	0,000772364156479286	0,00203026471549248	0,00168264537426263	-0,00024691658022274	-0,00210320681029979	-0,00160124056928358	-0,00316687294826702	0,000190095938343555	-0,000854315402999069	-0,000506301880786944	-0,000495869473739759	-0,000614847053582066	0,000484321153467709	0,000242106869297866	0	-0,022043484166259	-0,0179681032723805	-0,013891873085654	-0,0108677877802646	-0,00553549778261552	-0,00393755115047228	-0,00416829375736367	0,000589168397532607	0,0024346322577637	0,000207082464122609	0,001319298783429	-0,00255538831880395	-3.67995e+09	-0,00173236362780886	0,000247931116047776	-0,00163151927251584	-0,000842576635770851	-0,000585448099134545	-0,000486509921465763	0	0,0177866228275824	0,016715928399062	-0,00680732933619837	-0,00848090929090593	0,00119100534217254	0,0036351929157854
	Pom kne 2 L,Krk.P_kneri	P_kneri	1	0,01890279378574	0,0370657886335858	0,0222316401477602	0,0147425952246882	2.24927e+09	-0,00305959039919776	-0,00500068399423977	-0,00103117624017089	-0,000612960435282974	-0,000927154304510872	0,00108286089526472	-0,000436150639609447	-0,000309525351492244	0,000457013775873427	-0,000466792214349175	0,000362003757549082	0,000100201403651815	6.77269e+08	0,000371483512672399	0	-0,0124104376539772	0,0113870675138422	-0,00139167456307381	0,000817064115139478	0,0023845116345956	-0,00296683629373688	0,000478693760328714	-0,000296065704460143	-0,000689410294976795	0,000265339988167022	-0,000994785538556259	0,000538641464923309	-0,000285764770098603	0,000420929115884328	0,000175812566953986	-0,000215622146883061	0,000500978099935293	0,000150738127303182	3.80986e+09	0	0,0139150190095242	-0,000737186524826507	-0,00716940523708206	0,00899013235720567	0,00215526018800493	-0,00141912077140686
	Pom kne 2 R,Krk.P_kneri	P_kneri	1	0,0152959716429103	0,0279751381774592	0,0236771252202059	0,0167639997631836	0,00232188639570508	0,000820872969042699	-0,00301519853288314	0,00169460255122722	0,000244719350877994	0,000140843861116157	-0,000715322776894745	-0,000248825003483163	-0,000254985558768788	-0,000386713971432272	0,000477649927243298	0,000110307581924352	-9.62468e+09	0,000186044250423444	-6.66058e+09	0	-0,0197850808167886	0,00221416539804243	-0,019199712607867	-0,00365917575770559	-0,00325427978329812	0,00191300858767658	0,00114013693943634	0,000159756563352694	0,00116705487607353	0,000717025668522596	-0,000149077348392727	0,000161815230318378	0,000662143039563889	-0,000342860769235544	3.42815e+09	-4.52798e+09	-0,000145924296605884	-0,000352731785356309	-3.93609e+09	0	0,0223158248045012	0,00931888260172515	-0,0063594464760127	-0,00456003091124213	-0,00688013025786322	-0,00352342284929678
	Pom kne 3 L,Krk.P_kneri	P_kneri	1	-0,0151440266336388	-0,00552762926751222	-0,00572632359655521	-0,00508846115740441	0,00713955051172408	0,00020719267763303	0,00449027814628793	-0,00411609552159129	-0,00177911557229658	-0,000253456689839844	-0,00148632435604664	0,00140756010183556	-0,00039682320102032	0,000606249340820917	0,00215491602929802	-0,00132325613779078	0,000452505540796108	0,000168704257996566	-0,000640294458058106	0	-0,012892913678112	-0,0241329061929911	-0,0182960155261655	-0,0111356178879597	-0,00965843176987037	0,00170023878321588	-0,00529519278599504	-0,00156013479734453	0,000958603266821925	-0,00274915231942868	0,00148075171112452	0,000888286137975853	0,000540357296808504	0,000512974483933751	-0,000910605353286022	-0,000472058749849686	0,000856365824053358	7.34275e+09	1.73574e+09	0	0,0435390445504602	0,0177615272303034	-0,0097000228112764	-0,0157378477294041	0,00275042091956626	0,00361793666899384
	Pom kne 3 R,Krk.P_kneri	P_kneri	1	-0,0318136158653149	-0,010620832544178	-0,0157140549867852	-0,0108886005222188	-0,00502043582602938	0,00143503749993768	0,003366546484097	-0,000215509807808381	-0,00199461446560676	-0,000639734291438698	0,000238058682969623	0,00228779061596332	0,000844980599261278	-0,000989040577991827	-0,000435706719010623	0,00030363610640606	-3.28852e+09	0,000291079446984454	-0,000945366199656963	0	-0,0116072969953782	-0,0135428769728591	-0,0118967109058363	-0,00317115361540797	-0,0118311677623506	-0,00131102498450147	-0,00662483770762958	0,00189072372728876	0,00158920278531921	0,00146465296361351	-0,000975253412669098	0,00137929177639525	0,000994941042512004	-8.18807e+09	0,000870432447613536	-0,000670358177253855	0,000901284015936635	0,00110250110392877	0,000243146285261553	0	0,018788664551203	0,00520847597391179	-0,0105401687347841	-0,00552009203451319	0,010652490881584	0,00413852156993111
	Pom kne 4 R,Krk.P_kneri	P_kneri	1	0,00946369439766867	-0,000929430963415225	-0,0027861190799288	-0,00845386545705515	-0,00852314930810561	-0,00203344693124754	-0,00508548672278306	-0,000593975130098906	-0,000391137016304354	-0,000179443480741024	-0,000691802334930593	-0,00160561862850555	-0,000852067457197468	-0,00027237448900666	0,0010143763334389	0,000735774482593827	0,000350366484276888	-0,000159510448737449	-0,000266572879583761	0	-0,0143546204779297	-0,0117416296013328	-0,011336817122386	-0,00324867181095763	-0,0067193105035098	-0,000580914950070184	-0,0069636310458479	-0,00511649621350365	-0,00150683313103505	0,000275251330284743	0,000134598354141672	-0,000658962521939202	-0,00162663689323401	-0,00227204196479142	-0,00110399324179546	-0,000526917542877356	0,000446102504480427	3.70391e+09	-0,000369752216244522	0	-0,012392809234306	0,0261846819712355	-0,00814145188882033	-0,00805487209931725	0,00598841308646429	0,00712667349204892
[truncated: 102 more rows]
[truncated: 33 more columns]

## Sheet: Suppl. Data 3d
Supplementary Table S3d. Fourier descriptors when the reduced dataset of Pomatoschistus was included in the Fourier shape analysis.
[truncated: 104 more rows]
[truncated: 32 more columns]
